# Supplementary material
Source: PubMed Central journal article supplement (PMC2775461)
Supplement: NIHMS133848-supplement-1_si_001.pdf [file NIHMS133848-supplement-1_si_001.pdf]

**Supporting Information for:**

**Nitroxyl Radical plus Hydroxylamine Pseudo Self-Exchange Reactions: Tunneling in Hydrogen Atom Transfer**

Adam Wu,<sup>§</sup> Elizabeth A. Mader,<sup>§</sup> Ayan Datta,<sup>†</sup> David A. Hrovat<sup>†</sup>  
Weston Thatcher Borden,<sup>\*,†</sup> and James M. Mayer<sup>\*,§</sup>

Department of Chemistry, Campus Box 351700, University of Washington,  
Seattle, WA, 98195-1700, USA and Department of Chemistry,  
P.O. Box 305070, University of North Texas, Denton, TX 76203-5070 USA

\* To whom correspondence should be addressed; e-mails: borden@unt.edu; mayer@chem.washington.edu.

Figures S1 – S3, the complete author lists for references 32 and 33, the optimized geometries, energies, frequencies and thermal corrections for nitroxyl radicals (RR'NO·), hydroxylamines (RR'NOH), the corresponding hydrogen bonded complexes and hydrogen atom transfer transition structures, for R=R'=Me, R=H/R'=Me, R=R'=t-butyl, R=R'=phenyl, and TEMPO, (34 pages).

<sup>§</sup> University of Washington. <sup>†</sup> University of North Texas.

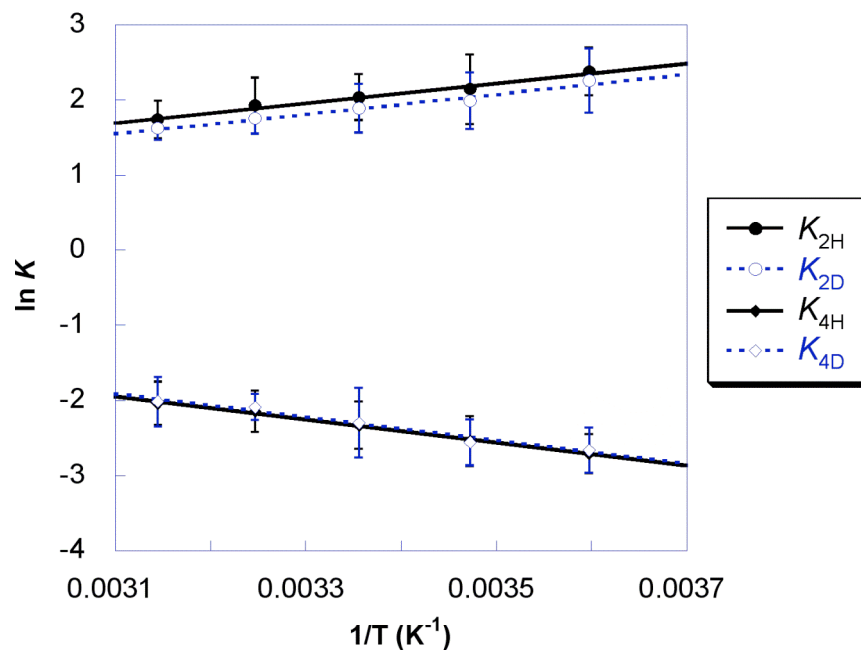

**Figure S1.** Van't Hoff plot for reactions 2 and 4 in  $\text{CD}_2\text{Cl}_2$  at 278–318 K. The protio equilibrium constants are shown with filled points and solid lines (—), and the deuterio ones with open points and dashed lines (---).

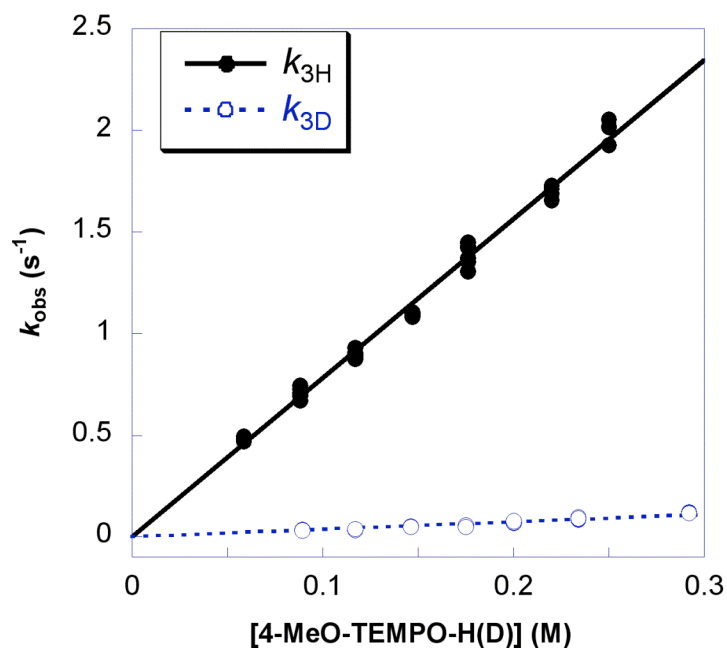

**Figure S2.** Plot of pseudo first order  $k_{\text{obs}}$  versus [4-MeO-TEMPO-H(D)] for reaction 3 in MeCN ( $k_{\text{H}}/k_{\text{D}} = 21 \pm 3$ ) at 298 K.

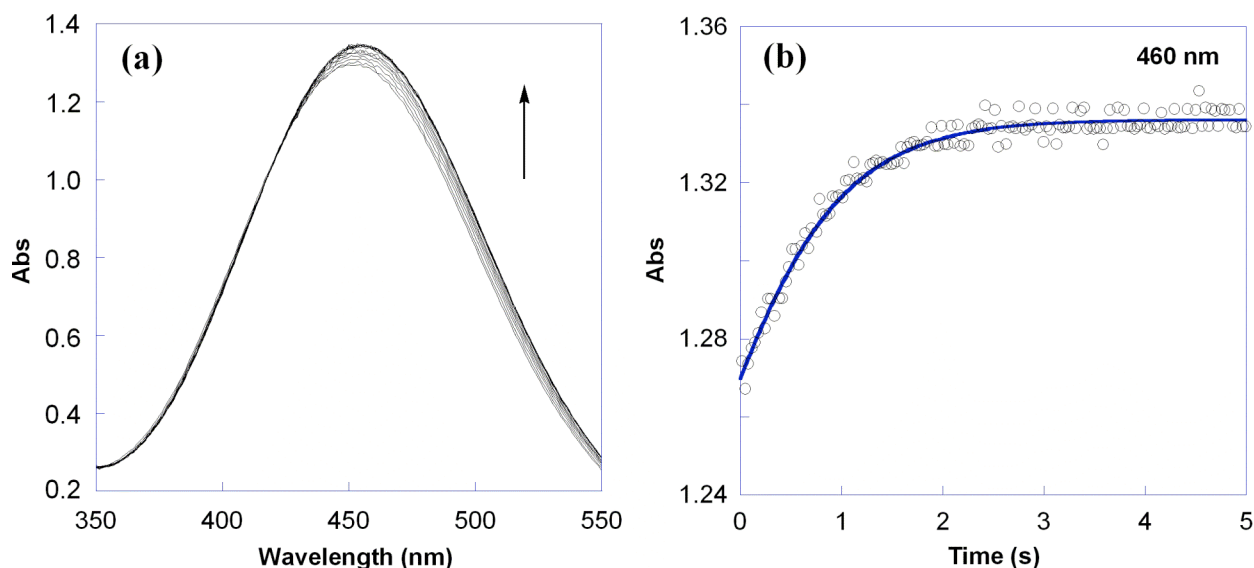

**Figure S3.** (a) Overlay plot of UV-vis spectra for the reaction of 139 mM  $t\text{Bu}_2\text{NO}^\bullet$  with 191 mM TEMPO-H (eq 4) in MeCN over 5 s at 298 K. (b) Absorbance at 460 nm (o) and the second order approach-to-equilibrium fit using SPECFIT (—).

*Complete reference 32:*

Gaussian 03, Revision D.02, Frisch, M. J.; Trucks, G. W.; Schlegel, H. B.; Scuseria, G. E.; Robb, M. A.; Cheeseman, J. R.; Montgomery, Jr., J. A.; Vreven, T.; Kudin, K. N.; Burant, J. C.; Millam, J. M.; Iyengar, S. S.; Tomasi, J.; Barone, V.; Mennucci, B.; Cossi, M.; Scalmani, G.; Rega, N.; Petersson, G. A.; Nakatsuji, H.; Hada, M.; Ehara, M.; Toyota, K.; Fukuda, R.; Hasegawa, J.; Ishida, M.; Nakajima, T.; Honda, Y.; Kitao, O.; Nakai, H.; Klene, M.; Li, X.; Knox, J. E.; Hratchian, H. P.; Cross, J. B.; Bakken, V.; Adamo, C.; Jaramillo, J.; Gomperts, R.; Stratmann, R. E.; Yazyev, O.; Austin, A. J.; Cammi, R.; Pomelli, C.; Ochterski, J. W.; Ayala, P. Y.; Morokuma, K.; Voth, G. A.; Salvador, P.; Dannenberg, J. J.; Zakrzewski, V. G.; Dapprich, S.; Daniels, A. D.; Strain, M. C.; Farkas, O.; Malick, D. K.; Rabuck, A. D.; Raghavachari, K.; Foresman, J. B.; Ortiz, J. V.; Cui, Q.; Baboul, A. G.; Clifford, S.; Cioslowski, J.; Stefanov, B. B.; Liu, G.; Liashenko, A.; Piskorz, P.; Komaromi, I.; Martin, R. L.; Fox, D. J.; Keith, T.; Al-Laham, M. A.; Peng, C. Y.; Nanayakkara, A.; Challacombe, M.; Gill, P. M. W.; Johnson, B.; Chen, W.; Wong, M. W.; Gonzalez, C.; and Pople, J. A., Gaussian, Inc., Wallingford CT, 2004.

*Complete reference 33:*

POLYRATE—version 9.5, Corchado, J. C.; Chuang, Y.-Y.; Fast, P. L.; Hu, W.-P.; Liu, Y.-P.; Lynch, G. C.; Nguyen, K. A.; Jackels, C. F.; Fernandez Ramos, A.; Ellingson, B. A.; Lynch, B. J.; Melissas, V. S.; Villà, J.; Rossi, I.; Coitiño, E. L.; Pu, J.; Albu, T. V.; Steckler, R.; Garrett, B. C.; Isaacson, A. D.; Truhlar, D. G., University of Minnesota, Minneapolis, 2007.

Dimethylnitroxyl Radical <sup>2</sup>A' UMPW1K/6-31+G(d,p) C<sub>s</sub> Geometry

|                                                        |                     |
|--------------------------------------------------------|---------------------|
| Nuclear repulsion energy                               | 130.801355 Hartree  |
| UMPW1K/6-31+G(d,p) energy (<S <sup>2</sup> > = 0.7572) | 0.086638 Hartree    |
| Zero-point energy correction                           | 0.092802 Hartree    |
| Thermal correction to Enthalpy                         | 0.058494 Hartree    |
| Thermal correction to Gibbs Free Energy                | -209.666559 Hartree |

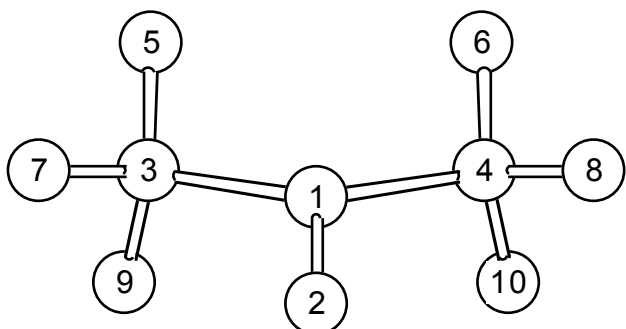

|     | X         | Y         | Z         |
|-----|-----------|-----------|-----------|
| N1  | 0.000000  | 0.116699  | -0.149335 |
| O2  | 0.000000  | 1.366277  | 0.042169  |
| C3  | -1.242768 | -0.594647 | 0.025150  |
| C4  | 1.242768  | -0.594648 | 0.025150  |
| H5  | -1.222411 | -1.522672 | -0.540441 |
| H6  | 1.222411  | -1.522672 | -0.540442 |
| H7  | -2.043338 | 0.040730  | -0.335670 |
| H8  | 2.043338  | 0.040730  | -0.335669 |
| H9  | -1.415264 | -0.823726 | 1.079210  |
| H10 | 1.415263  | -0.823727 | 1.079209  |

|                      |       |               |        |           |       |         |       |         |       |
|----------------------|-------|---------------|--------|-----------|-------|---------|-------|---------|-------|
| (1-2)                | 1.264 | (1-3)         | 1.443  | (3-5)     | 1.087 | (3-7)   | 1.084 | (3-9)   | 1.092 |
| (2-1-3)              | 118.0 | (3-1-4)       | 119.0  | (1-3-5)   | 110.0 | (1-3-7) |       | (1-3-9) | 107.9 |
| (1-3-9)              | 110.9 | (5-3-7)       | 109.9  | (5-3-9)   | 109.0 | (7-3-9) |       |         | 109.1 |
| (2-1-3-5)            | 156.7 | (2-1-3-7)     | 36.8   | (2-1-3-9) |       |         |       |         | -82.6 |
| (4-1-3-5)            | -49.0 | (4-1-3-7)     | -168.9 | (4-1-3-9) |       |         |       |         | 71.7  |
| (bond)-(plane) angle |       | (2-1)-(3-1-4) | 22.5   |           |       |         |       |         |       |

|                                 |        |        |        |        |        |        |        |        |
|---------------------------------|--------|--------|--------|--------|--------|--------|--------|--------|
| Frequencies(cm <sup>-1</sup> ): | 145.8  | 166.6  | 290.1  | 413.0  | 531.1  | 873.7  | 1062.6 | 1105.4 |
|                                 | 1170.7 | 1192.0 | 1349.7 | 1465.8 | 1486.2 | 1508.8 | 1510.9 | 1524.1 |
|                                 | 1527.7 | 1597.8 | 3097.5 | 3103.1 | 3194.1 | 3196.3 | 3257.5 | 3259.1 |

Dimethylhydroxylamine <sup>1</sup>A' MPW1K/6-31+G(d,p) C<sub>s</sub> Geometry

|                                         |                     |
|-----------------------------------------|---------------------|
| Nuclear repulsion energy                | 138.862073 Hartree  |
| UMPW1K/6-31+G(d,p) energy               | -210.287997 Hartree |
| Zero-point energy correction            | 0.099435 Hartree    |
| Thermal correction to Enthalpy          | 0.105539 Hartree    |
| Thermal correction to Gibbs Free Energy | 0.072374 Hartree    |

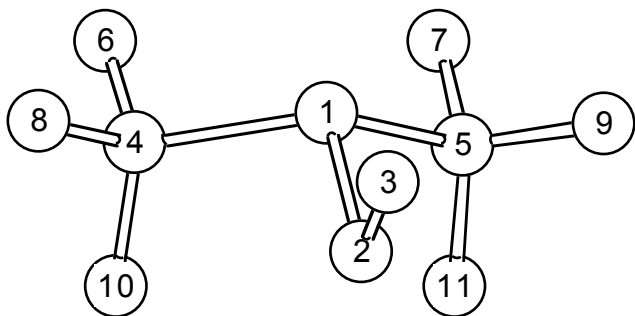

|     | X         | Y         | Z         |
|-----|-----------|-----------|-----------|
| N1  | -0.312404 | 0.248317  | 0.000000  |
| O2  | 0.906119  | 0.964734  | 0.000000  |
| H3  | 0.635718  | 1.880669  | 0.000000  |
| C4  | -0.312404 | -0.561497 | 1.194832  |
| C5  | -0.312404 | -0.561497 | -1.194832 |
| H6  | -1.231263 | -1.142834 | 1.218235  |
| H7  | -1.231263 | -1.142834 | -1.218235 |
| H8  | -0.288623 | 0.084849  | 2.066871  |
| H9  | -0.288623 | 0.084849  | -2.066871 |
| H10 | 0.545388  | -1.241417 | 1.234166  |
| H11 | 0.545388  | -1.241417 | -1.234166 |

|                      |       |               |       |            |       |          |       |        |       |
|----------------------|-------|---------------|-------|------------|-------|----------|-------|--------|-------|
| (1-4)                | 1.443 | (2-3)         | 0.955 | (4-6)      | 1.088 | (4-8)    | 1.086 | (4-10) | 1.095 |
| (4-1-5)              | 111.7 | (1-4-6)       | 108.5 | (1-4-8)    | 109.3 | (1-4-10) |       |        | 112.2 |
| (6-4-8)              | 108.6 | (6-4-10)      | 109.2 | (8-4-10)   | 108.9 |          |       |        |       |
| (5-1-4-6)            | -63.0 | (5-1-4-8)     | 178.7 | (5-1-4-10) |       |          |       |        | 57.8  |
| (bond)-(plane) angle |       | (2,1)-(4-1-5) | 59.5  |            |       |          |       |        |       |

|                                 |        |        |        |        |        |        |        |        |
|---------------------------------|--------|--------|--------|--------|--------|--------|--------|--------|
| Frequencies(cm <sup>-1</sup> ): | 249.3  | 285.4  | 317.1  | 417.7  | 457.1  | 476.5  | 891.1  | 1058.3 |
|                                 | 1059.1 | 1142.6 | 1216.9 | 1276.9 | 1319.4 | 1406.2 | 1474.1 | 1498.9 |
|                                 | 1511.3 | 1527.9 | 1531.3 | 1553.5 | 3071.4 | 3077.2 | 3183.1 | 3187.4 |
|                                 | 3230.0 | 3233.1 | 3994.4 |        |        |        |        |        |

Dimethylhydroxylamine + Dimethylnitroxyl Radical H-bonded Complex  
<sup>2</sup>A UMPW1K/6-31+G(d,p) C<sub>1</sub> Geometry

|                                                        |                     |
|--------------------------------------------------------|---------------------|
| Nuclear repulsion energy                               | 408.999620 Hartree  |
| UMPW1K/6-31+G(d,p) energy (<S <sup>2</sup> > = 0.7573) | -419.966269 Hartree |
| Zero-point correction                                  | 0.188069 Hartree    |
| Thermal correction to Enthalpy                         | 0.200801 Hartree    |
| Thermal correction to Gibbs Free Energy                | 0.147861 Hartree    |

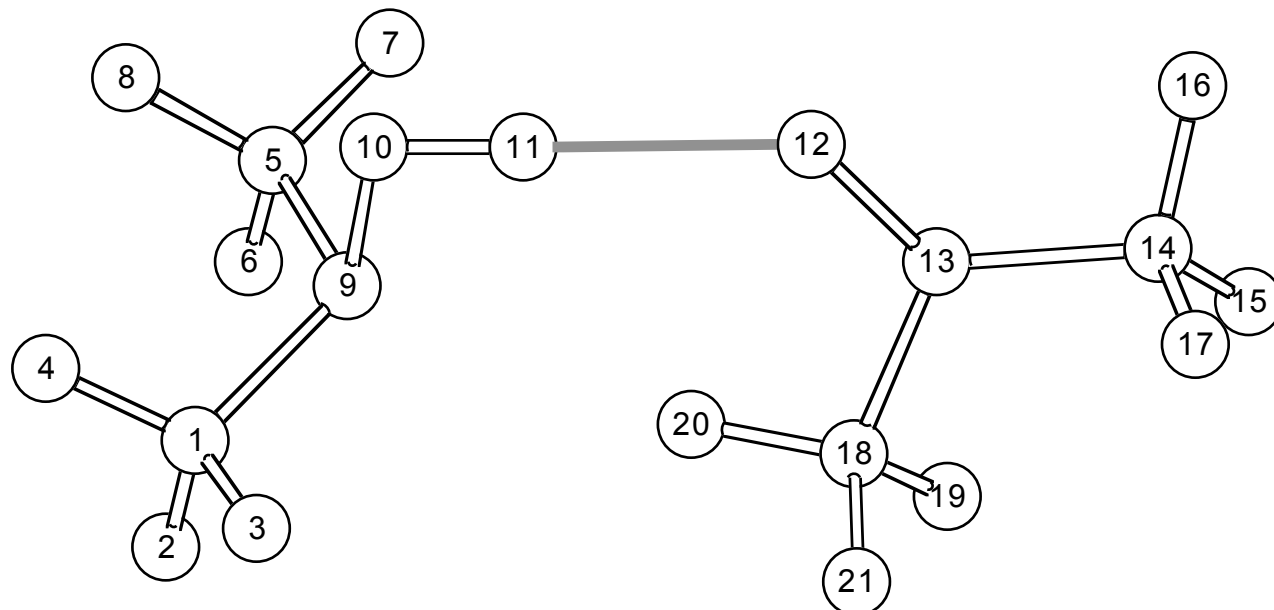

|     | X         | Y         | Z         |     | X        | Y         | Z         |
|-----|-----------|-----------|-----------|-----|----------|-----------|-----------|
| C1  | -2.634435 | 0.846718  | -0.802060 | O12 | 1.442910 | -0.979698 | -0.413866 |
| H2  | -2.985541 | 1.741410  | -0.291672 | N13 | 2.064216 | -0.009585 | 0.110967  |
| H3  | -2.074531 | 1.142009  | -1.684553 | C14 | 3.503063 | -0.087799 | 0.149196  |
| H4  | -3.497695 | 0.251583  | -1.118927 | H15 | 3.884631 | 0.538207  | 0.951161  |
| C5  | -2.471235 | -0.330296 | 1.268417  | H16 | 3.778455 | -1.121916 | 0.320690  |
| H6  | -2.812141 | 0.542295  | 1.822392  | H17 | 3.931378 | 0.245650  | -0.798156 |
| H7  | -1.792695 | -0.900001 | 1.896406  | C18 | 1.418663 | 1.280113  | 0.170447  |
| H8  | -3.332563 | -0.960008 | 1.021291  | H19 | 1.817210 | 1.847496  | 1.007685  |
| N9  | -1.767340 | 0.110117  | 0.086340  | H20 | 0.349741 | 1.119116  | 0.295427  |
| O10 | -1.372246 | -1.045930 | -0.610351 | H21 | 1.599255 | 1.837226  | -0.751792 |
| H11 | -0.405296 | -1.034191 | -0.573361 |     |          |           |           |

|            |       |            |        |            |        |            |       |         |       |
|------------|-------|------------|--------|------------|--------|------------|-------|---------|-------|
| (1-2)      | 1.088 | (1-3)      | 1.086  | (1-4)      | 1.095  | (1-9)      | 1.443 | (5-6)   | 1.088 |
| (5-7)      | 1.086 | (5-8)      | 1.095  | (5-9)      | 1.445  | (9-10)     | 1.406 | (10-11) | 0.968 |
| (11-12)    | 1.856 | (12-13)    | 1.266  | (13-14)    | 1.441  | (13-18)    | 1.443 | (14-15) | 1.087 |
| (14-16)    | 1.084 | (14-17)    | 1.092  | (18-19)    | 1.087  | (18-20)    | 1.088 | (18-21) | 1.092 |
| (2-1-3)    | 108.9 | (2-1-4)    | 109.2  | (2-1-9)    | 108.9  | (3-1-4)    | 108.6 |         |       |
| (3-1-9)    | 109.2 | (4-1-9)    | 112.0  | (6-5-7)    | 108.8  | (6-5-8)    | 109.2 |         |       |
| (6-5-9)    | 108.9 | (7-5-8)    | 108.7  | (7-5-9)    | 109.2  | (8-5-9)    | 112.0 |         |       |
| (1-9-5)    | 111.5 | (1-9-10)   | 106.5  | (5-9-10)   | 107.0  | (9-10-11)  | 104.6 |         |       |
| (10-11-12) | 177.1 | (11-12-13) | 123.2  | (12-13-14) | 117.3  | (12-13-18) | 118.8 |         |       |
| (14-13-18) | 119.6 | (13-14-15) | 109.8  | (13-14-16) | 108.0  | (13-14-17) | 110.6 |         |       |
| (15-14-16) | 110.1 | (15-14-17) | 109.1  | (16-14-17) | 109.2  | (13-18-19) | 109.5 |         |       |
| (13-18-20) | 108.2 | (13-18-21) | 110.3  | (19-18-20) | 110.4  | (19-18-21) | 108.9 |         |       |
| (20-18-21) | 109.6 |            |        |            |        |            |       |         |       |
| (2-1-9-5)  | 62.3  | (2-1-9-10) | 178.6  | (3-1-9-5)  | -178.9 |            |       |         |       |
| (3-1-9-10) | -62.6 | (4-1-9-5)  | -58.6  | (4-1-9-10) | 57.8   |            |       |         |       |
| (6-5-9-1)  | -62.7 | (6-5-9-10) | -178.7 | (7-5-9-1)  | 178.6  |            |       |         |       |
| (7-5-9-10) | 62.6  | (8-5-9-1)  | 58.2   | (8-5-9-10) | -57.8  |            |       |         |       |

|                      |        |                    |        |               |       |
|----------------------|--------|--------------------|--------|---------------|-------|
| (1-9-10-11)          | 126.1  | (5-9-10-11)        | -114.6 | (9-10-11-12)  | 38.7  |
| (10-11-12-13)        | -43.9  | (11-12-13-14)      | -179.0 | (11-12-13-18) | -22.1 |
| (12-13-14-15)        | -156.1 | (12-13-14-16)      | -36.0  | (12-13-14-17) | 83.5  |
| (18-13-14-15)        | 47.2   | (18-13-14-16)      | 167.3  | (18-13-14-17) | -73.2 |
| (12-13-18-19)        | 153.4  | (12-13-18-20)      | 33.0   | (12-13-18-21) | -86.8 |
| (14-13-18-19)        | -50.3  | (14-13-18-20)      | -170.7 | (14-13-18-21) | 69.5  |
| (9-10,12-13)         | -5.1   |                    |        |               |       |
| (bond)-(plane) angle |        | (10-9)-(1-9-5)     | 59.3   |               |       |
| (bond)-(plane) angle |        | (12-13)-(14-13-18) | 20.6   |               |       |

|                                  |        |        |        |        |        |        |        |        |
|----------------------------------|--------|--------|--------|--------|--------|--------|--------|--------|
| Frequencies( $\text{cm}^{-1}$ ): | 20.8   | 33.3   | 62.2   | 85.2   | 120.6  | 147.0  | 154.5  | 223.1  |
|                                  | 252.7  | 287.3  | 291.1  | 423.0  | 423.2  | 470.4  | 477.3  | 551.4  |
|                                  | 901.7  | 1057.8 | 1073.6 | 1074.4 | 1108.4 | 1140.7 | 1173.9 | 1202.1 |
|                                  | 1202.1 | 1227.9 | 1287.8 | 1316.8 | 1351.4 | 1471.4 | 1472.1 | 1494.6 |
|                                  | 1498.8 | 1510.0 | 1510.3 | 1513.0 | 1517.2 | 1527.1 | 1531.3 | 1538.7 |
|                                  | 1547.4 | 1553.9 | 1609.2 | 3070.7 | 3076.2 | 3086.7 | 3106.6 | 3175.7 |
|                                  | 3178.4 | 3180.5 | 3201.2 | 3221.3 | 3224.5 | 3227.3 | 3261.1 | 3749.8 |

Dimethylhydroxylamine + Dimethylnitroxyl Radical Transition Structure  
 $^2B_2$  UMPW1K/6-31+G(d,p)  $C_{2h}$  Geometry

|                                                              |                     |
|--------------------------------------------------------------|---------------------|
| Nuclear repulsion energy                                     | 410.022714 Hartree  |
| UMPW1K/6-31+G(d,p) energy ( $\langle S^2 \rangle = 0.7605$ ) | -419.928609 Hartree |
| Zero-point correction                                        | 0.182002 Hartree    |
| Thermal correction to Enthalpy                               | 0.194085 Hartree    |
| Thermal correction to Gibbs Free Energy                      | 0.143384 Hartree    |

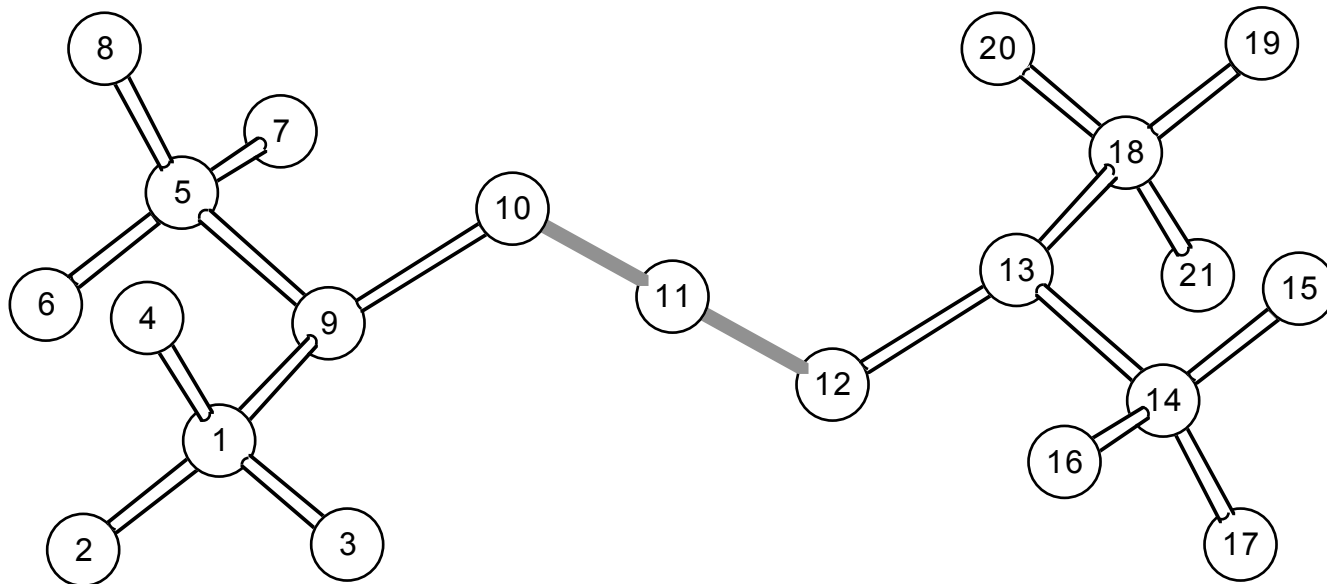

|     | X         | Y        | Z         |     | X         | Y         | Z         |
|-----|-----------|----------|-----------|-----|-----------|-----------|-----------|
| C1  | 0.000000  | 2.780659 | 1.223811  | O12 | -0.682560 | -0.952277 | 0.000000  |
| H2  | -0.753498 | 3.564007 | 1.221718  | N13 | 0.088101  | -2.029816 | 0.000000  |
| H3  | -0.184292 | 2.110154 | 2.056821  | C14 | 0.000000  | -2.780659 | 1.223811  |
| H4  | 0.989454  | 3.234132 | 1.347576  | H15 | 0.753498  | -3.564007 | 1.221718  |
| C5  | 0.000000  | 2.780659 | -1.223811 | H16 | 0.184292  | -2.110154 | 2.056821  |
| H6  | -0.753498 | 3.564007 | -1.221718 | H17 | -0.989454 | -3.234132 | 1.347576  |
| H7  | -0.184292 | 2.110154 | -2.056821 | C18 | 0.000000  | -2.780659 | -1.223811 |
| H8  | 0.989454  | 3.234132 | -1.347576 | H19 | 0.753498  | -3.564007 | -1.221718 |
| N9  | -0.088101 | 2.029816 | 0.000000  | H20 | 0.184292  | -2.110154 | -2.056821 |
| O10 | 0.682560  | 0.952277 | 0.000000  | H21 | -0.989454 | -3.234132 | -1.347576 |
| H11 | 0.000000  | 0.000000 | 0.000000  |     |           |           |           |

|         |       |       |       |       |       |       |       |        |       |
|---------|-------|-------|-------|-------|-------|-------|-------|--------|-------|
| (1-2)   | 1.087 | (1-3) | 1.085 | (1-4) | 1.095 | (1-9) | 1.438 | (9-10) | 1.325 |
| (10-11) | 1.172 |       |       |       |       |       |       |        |       |

|                                                                                |                |            |        |            |       |          |       |
|--------------------------------------------------------------------------------|----------------|------------|--------|------------|-------|----------|-------|
| (2-1-3)                                                                        | 109.2          | (2-1-4)    | 109.1  | (2-1-9)    | 109.4 | (3-1-4)  | 108.8 |
| (3-1-9)                                                                        | 108.7          | (4-1-9)    | 111.6  | (1-9-5)    | 116.6 | (1-9-10) | 112.9 |
| (9-10-11)                                                                      | 108.8          |            |        |            |       |          |       |
| (2-1-9-5)                                                                      | 55.0           | (2-1-9-10) | -171.9 | (3-1-9-5)  | 174.1 |          |       |
| (3-1-9-10)                                                                     | -52.7          | (4-1-9-5)  | -65.9  | (4-1-9-10) | 67.2  |          |       |
| (1-9-10-11)                                                                    | 112.6          |            |        |            |       |          |       |
| (bond)-(plane) angle                                                           | (10-9)-(1-9-5) | 42.3       |        |            |       |          |       |
| Frequencies( $\text{cm}^{-1}$ ): -2715.4 18.7 44.5 59.7 87.2 166.6 210.1 210.5 |                |            |        |            |       |          |       |
| 215.1 225.4 329.0 389.8 424.4 435.4 503.1 503.6 722.6 896.0                    |                |            |        |            |       |          |       |
| 909.2 1017.8 1069.7 1070.6 1127.7 1128.0 1157.5 1168.1 1204.3 1206.2           |                |            |        |            |       |          |       |
| 1347.7 1348.0 1406.1 1422.5 1470.0 1471.6 1491.3 1495.1 1509.2 1509.4          |                |            |        |            |       |          |       |
| 1524.2 1525.5 1528.0 1528.7 1548.7 1549.1 1718.1 3067.9 3067.9 3068.0          |                |            |        |            |       |          |       |
| 3075.1 3185.5 3185.7 3188.5 3188.7 3240.8 3240.8 3243.4 3243.5                 |                |            |        |            |       |          |       |

Methylnitroxyl Radical  $^2A$  UMPW1K/6-31+G(d,p)  $C_1$  Geometry

|                                                              |                     |
|--------------------------------------------------------------|---------------------|
| Nuclear repulsion energy                                     | 77.236334 Hartree   |
| UMPW1K/6-31+G(d,p) energy ( $\langle S^2 \rangle = 0.7569$ ) | -170.358632 Hartree |
| Zero-point energy correction                                 | 0.057519 Hartree    |
| Thermal correction to Enthalpy                               | 0.062573 Hartree    |
| Thermal correction to Gibbs Free Energy                      | 0.031707 Hartree    |

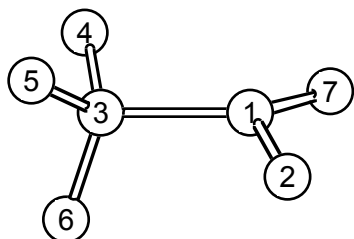

|    | X         | Y         | Z         |
|----|-----------|-----------|-----------|
| N1 | -0.176583 | 0.423749  | -0.054887 |
| O2 | -1.207831 | -0.299469 | 0.014678  |
| C3 | 1.131949  | -0.168668 | 0.009456  |
| H4 | 1.875097  | 0.576628  | -0.260643 |
| H5 | 1.173427  | -0.993893 | -0.694962 |
| H6 | 1.345671  | -0.546716 | 1.009728  |
| H7 | -0.287162 | 1.405502  | 0.155925  |

|                      |               |           |        |           |       |         |       |       |       |
|----------------------|---------------|-----------|--------|-----------|-------|---------|-------|-------|-------|
| (1-2)                | 1.261         | (1-3)     | 1.438  | (1-7)     | 1.010 | (3-4)   | 1.087 | (3-5) | 1.086 |
| (3-6)                | 1.090         |           |        |           |       |         |       |       |       |
| (2-1-3)              | 120.4         | (2-1-7)   | 117.1  | (3-1-7)   | 119.4 | (1-3-4) | 109.2 |       |       |
| (1-3-5)              | 108.6         | (1-3-6)   | 111.2  | (4-3-5)   | 109.5 | (4-3-6) | 109.4 |       |       |
| (5-3-6)              | 108.9         |           |        |           |       |         |       |       |       |
| (2-1-3-4)            | 169.0         | (2-1-3-5) | 49.6   | (2-1-3-6) | -70.2 |         |       |       |       |
| (7-1-3-4)            | -31.6         | (7-1-3-5) | -150.9 | (7-1-3-6) | 89.2  |         |       |       |       |
| (bond)-(plane) angle | (2-1)-(3-1-7) | 17.6      |        |           |       |         |       |       |       |

|                                                                                       |  |  |  |  |  |  |  |  |  |
|---------------------------------------------------------------------------------------|--|--|--|--|--|--|--|--|--|
| Frequencies( $\text{cm}^{-1}$ ): 151.0 370.3 528.8 1020.5 1142.4 1231.0 1471.5 1505.4 |  |  |  |  |  |  |  |  |  |
| 1513.2 1533.1 1605.1 3113.5 3202.2 3241.4 3618.7                                      |  |  |  |  |  |  |  |  |  |

Methylhydroxylamine  $^1A$  MPW1K/6-31+G(d,p)  $C_1$  Geometry

|                                         |                     |
|-----------------------------------------|---------------------|
| Nuclear repulsion energy                | 83.231875 Hartree   |
| MPW1K/6-31+G(d,p) energy                | -170.982727 Hartree |
| Zero-point energy correction            | 0.071264 Hartree    |
| Thermal correction to Enthalpy          | 0.076267 Hartree    |
| Thermal correction to Gibbs Free Energy | 0.046168 Hartree    |

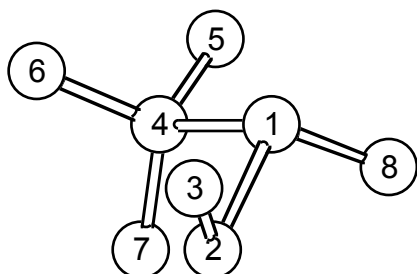

|    | X         | Y         | Z         |
|----|-----------|-----------|-----------|
| N1 | -0.052374 | 0.553516  | -0.150725 |
| O2 | -1.150083 | -0.286082 | 0.128047  |
| H3 | -1.685557 | -0.235822 | -0.660601 |
| C4 | 1.153224  | -0.224884 | 0.004760  |
| H5 | 2.000876  | 0.453741  | -0.070200 |
| H6 | 1.221810  | -0.948841 | -0.802612 |
| H7 | 1.199535  | -0.757128 | 0.957714  |
| H8 | -0.088727 | 1.251393  | 0.577839  |

|                                                                                     |        |               |       |         |           |         |       |       |       |
|-------------------------------------------------------------------------------------|--------|---------------|-------|---------|-----------|---------|-------|-------|-------|
| (1-2)                                                                               | 1.410  | (1-4)         | 1.443 | (1-8)   | 1.010     | (2-3)   | 0.955 | (4-5) | 1.088 |
| (4-6)                                                                               | 1.087  | (4-7)         | 1.092 |         |           |         |       |       |       |
| (2-1-4)                                                                             | 107.9  | (2-1-8)       | 103.9 | (4-1-8) | 109.0     | (1-2-3) | 104.0 |       |       |
| (1-4-5)                                                                             | 107.9  | (1-4-6)       | 109.4 | (1-4-7) | 113.1     | (5-4-6) | 108.4 |       |       |
| (5-4-7)                                                                             | 109.3  | (6-4-7)       | 108.7 |         |           |         |       |       |       |
| (4-1-2-3)                                                                           | -123.6 | (8-1-2-3)     |       | 120.7   | (2-1-4-5) | -172.1  |       |       |       |
| (2-1-4-6)                                                                           | 70.3   | (2-1-4-7)     |       | -51.0   | (8-1-4-5) | -59.8   |       |       |       |
| (8-1-4-6)                                                                           | -177.5 | (8-1-4-7)     |       | 61.2    |           |         |       |       |       |
| (bond)-(plane) angle                                                                |        | (2-1)-(4-1-8) |       | 61.7    |           |         |       |       |       |
| Frequencies(cm <sup>-1</sup> ): 270.3 361.4 457.5 925.3 1002.3 1154.3 1191.9 1263.8 |        |               |       |         |           |         |       |       |       |
| 1415.2 1485.8 1515.7 1541.5 1566.1 3095.2 3184.4 3220.6 3632.0 3997.9               |        |               |       |         |           |         |       |       |       |

Methylhydroxylamine + Methylnitroxyl Radical H-bonded Complex  
<sup>2</sup>A UMPW1K/6-31+G(d,p) C<sub>1</sub> Geometry

|                                                        |                     |
|--------------------------------------------------------|---------------------|
| Nuclear repulsion energy                               | 247.045913 Hartree  |
| UMPW1K/6-31+G(d,p) energy (<s <sup>2</sup> > = 0.7570) | -341.351990 Hartree |
| Zero-point correction                                  | 0.130910 Hartree    |
| Thermal correction to Enthalpy                         | 0.141306 Hartree    |
| Thermal correction to Gibbs Free Energy                | 0.094136 Hartree    |

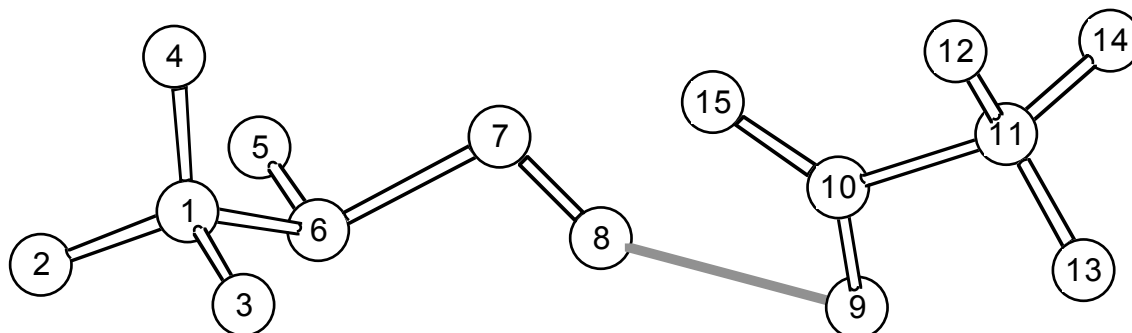

|    | X         | Y         | Z         |     | X        | Y         | Z         |
|----|-----------|-----------|-----------|-----|----------|-----------|-----------|
| C1 | -2.702925 | 0.870337  | 0.291331  | O9  | 1.435199 | -0.965749 | 0.525162  |
| H2 | -3.737693 | 0.847948  | 0.628363  | N10 | 1.669114 | 0.176757  | 0.036896  |
| H3 | -2.093100 | 1.275696  | 1.094692  | C11 | 3.022894 | 0.612120  | -0.160527 |
| H4 | -2.624101 | 1.528613  | -0.578563 | H12 | 3.023021 | 1.670590  | -0.404207 |
| H5 | -2.897285 | -0.873253 | -0.693113 | H13 | 3.581014 | 0.448977  | 0.756636  |
| N6 | -2.294484 | -0.485255 | 0.017551  | H14 | 3.498370 | 0.055013  | -0.968084 |
| O7 | -1.026930 | -0.450180 | -0.591276 | H15 | 0.898878 | 0.625370  | -0.445199 |
| H8 | -0.457493 | -0.986780 | -0.027567 |     |          |           |           |

|                      |        |               |        |               |        |            |       |         |       |
|----------------------|--------|---------------|--------|---------------|--------|------------|-------|---------|-------|
| (1-2)                | 1.089  | (1-3)         | 1.087  | (1-4)         | 1.094  | (1-6)      | 1.442 | (5-6)   | 1.009 |
| (6-7)                | 1.407  | (7-8)         | 0.964  | (8-9)         | 1.972  | (9-10)     | 1.264 | (10-11) | 1.436 |
| (10-15)              | 1.013  | (11-12)       | 1.086  | (11-13)       | 1.086  | (11-14)    | 1.090 |         |       |
| (2-1-3)              | 108.2  | (2-1-4)       | 109.1  | (2-1-6)       | 108.0  | (3-1-4)    | 108.8 |         |       |
| (3-1-6)              | 109.4  | (4-1-6)       | 113.2  | (1-6-5)       | 109.0  | (1-6-7)    | 108.3 |         |       |
| (5-6-7)              | 104.1  | (6-7-8)       | 105.4  | (7-8-9)       | 136.4  | (8-9-10)   | 94.5  |         |       |
| (9-10-11)            | 120.1  | (9-10-15)     | 116.3  | (11-10-15)    | 121.1  | (10-11-12) | 109.1 |         |       |
| (10-11-13)           | 108.8  | (10-11-14)    | 111.0  | (12-11-13)    | 109.6  | (12-11-14) | 109.4 |         |       |
| (13-11-14)           | 108.9  |               |        |               |        |            |       |         |       |
| (2-1-6-5)            | 59.4   | (2-1-6-7)     | 172.0  | (3-1-6-5)     | 176.9  |            |       |         |       |
| (3-1-6-7)            | -70.5  | (4-1-6-5)     | -61.5  | (4-1-6-7)     | 51.1   |            |       |         |       |
| (1-6-7-8)            | 122.8  | (5-6-7-8)     | -121.3 | (6-7-8-9)     | -146.1 |            |       |         |       |
| (7-8-9-10)           | 10.0   | (8-9-10-11)   | -164.3 | (8-9-10-15)   | -1.9   |            |       |         |       |
| (9-10-11-12)         | -169.3 | (9-10-11-13)  | -49.8  | (9-10-11-14)  | 70.1   |            |       |         |       |
| (15-10-11-12)        | 29.1   | (15-10-11-13) | 148.7  | (15-10-11-14) | -91.4  |            |       |         |       |
| (bond)-(plane) angle |        | (7-6)-(1-6-5) |        | 61.2          |        |            |       |         |       |



(bond)-(plane) angle (9-10)-(11-10-15) 15.9

|                                  |        |        |        |        |        |        |        |        |        |        |
|----------------------------------|--------|--------|--------|--------|--------|--------|--------|--------|--------|--------|
| Frequencies( $\text{cm}^{-1}$ ): | 28.6   | 56.2   | 69.0   | 82.9   | 135.7  | 166.3  | 193.9  | 289.0  |        |        |
|                                  | 447.7  | 475.2  | 547.3  | 689.0  | 926.8  | 1004.0 | 1027.3 | 1141.6 | 1172.7 | 1195.1 |
|                                  | 1232.5 | 1266.1 | 1462.3 | 1477.2 | 1484.6 | 1510.7 | 1514.1 | 1517.2 | 1535.6 | 1545.8 |
|                                  | 1568.2 | 1612.2 | 3083.2 | 3116.4 | 3177.5 | 3205.1 | 3216.5 | 3243.2 | 3587.8 | 3632.6 |

Methylhydroxylamine + Methylnitroxyl Radical Transition Structure  
 $^2\text{B}$  UMPW1K/6-31+G(d,p)  $\text{C}_2$  Geometry

|                                                              |                     |
|--------------------------------------------------------------|---------------------|
| Nuclear repulsion energy                                     | 252.296032 Hartree  |
| UMPW1K/6-31+G(d,p) energy ( $\langle s^2 \rangle = 0.7609$ ) | -341.314519 Hartree |
| Zero-point correction                                        | 0.125143 Hartree    |
| Thermal correction to Enthalpy                               | 0.134611 Hartree    |
| Thermal correction to Gibbs Free Energy                      | 0.090596 Hartree    |

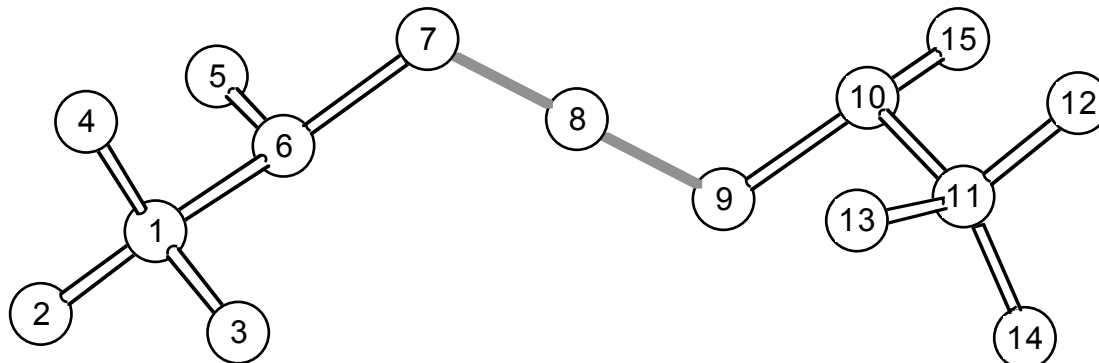

|    | X         | Y        | Z         |     | X         | Y         | Z         |
|----|-----------|----------|-----------|-----|-----------|-----------|-----------|
| C1 | -0.051842 | 2.784553 | -0.794427 | O9  | 0.699723  | -0.936707 | 0.457025  |
| H2 | 0.592533  | 3.656659 | -0.715210 | N10 | -0.051842 | -2.024840 | 0.420163  |
| H3 | 0.289546  | 2.171327 | -1.623903 | C11 | 0.051842  | -2.784553 | -0.794427 |
| H4 | -1.076416 | 3.106982 | -0.996188 | H12 | -0.592533 | -3.656659 | -0.715210 |
| H5 | -0.032981 | 2.555729 | 1.273211  | H13 | -0.289546 | -2.171327 | -1.623903 |
| N6 | 0.051842  | 2.024840 | 0.420163  | H14 | 1.076416  | -3.106982 | -0.996188 |
| O7 | -0.699723 | 0.936707 | 0.457025  | H15 | 0.032981  | -2.555729 | 1.273211  |
| H8 | 0.000000  | 0.000000 | 0.462626  |     |           |           |           |

|                      |       |               |        |           |       |         |       |       |       |
|----------------------|-------|---------------|--------|-----------|-------|---------|-------|-------|-------|
| (1-2)                | 1.087 | (1-3)         | 1.087  | (1-4)     | 1.093 | (1-6)   | 1.436 | (5-6) | 1.008 |
| (6-7)                | 1.323 | (7-8)         | 1.169  |           |       |         |       |       |       |
| (2-1-3)              | 108.8 | (2-1-4)       | 109.4  | (2-1-6)   | 108.7 | (3-1-4) | 108.7 |       |       |
| (3-1-6)              | 108.9 | (4-1-6)       | 112.3  | (1-6-5)   | 115.5 | (1-6-7) | 114.7 |       |       |
| (5-6-7)              | 111.2 | (6-7-8)       | 108.6  | (7-8-9)   | 179.5 |         |       |       |       |
| (2-1-6-5)            | 48.0  | (2-1-6-7)     | 179.4  | (3-1-6-5) | 166.4 |         |       |       |       |
| (3-1-6-7)            | -62.3 | (4-1-6-5)     | -73.2  | (4-1-6-7) | 58.2  |         |       |       |       |
| (1-6-7-8)            | 113.1 | (5-6-7-8)     | -113.5 | (6-7-8-9) | -88.4 |         |       |       |       |
| (bond)-(plane) angle |       | (7-6)-(1-6-5) | 43.0   |           |       |         |       |       |       |

|                                  |         |        |        |        |        |        |        |        |        |        |
|----------------------------------|---------|--------|--------|--------|--------|--------|--------|--------|--------|--------|
| Frequencies( $\text{cm}^{-1}$ ): | -2652.4 | 24.8   | 77.3   | 79.9   | 130.6  | 195.3  | 240.6  | 273.6  |        |        |
|                                  | 429.5   | 467.2  | 700.0  | 751.7  | 776.1  | 995.8  | 1022.1 | 1030.3 | 1166.7 | 1168.9 |
|                                  | 1238.5  | 1238.7 | 1358.4 | 1363.3 | 1481.7 | 1484.5 | 1512.4 | 1513.2 | 1531.4 | 1531.9 |
|                                  | 1561.6  | 1567.2 | 1710.9 | 3089.7 | 3092.1 | 3186.4 | 3186.7 | 3229.1 | 3229.2 | 3646.5 |

## 2,2,6,6-Tetramethyl-piperidin-1-oxyl Radical (TEMPO)

 $^2A'$  UMPW1K/6-31+G(d,p)  $C_s$  Geometry

|                                                              |                     |
|--------------------------------------------------------------|---------------------|
| Nuclear repulsion energy                                     | 721.579792 Hartree  |
| UMPW1K/6-31+G(d,p) energy ( $\langle s^2 \rangle = 0.7571$ ) | -483.640242 Hartree |
| Zero-point correction                                        | 0.269673 Hartree    |
| Thermal correction to Enthalpy                               | 0.282283 Hartree    |
| Thermal correction to Gibbs Free Energy                      | 0.233322 Hartree    |

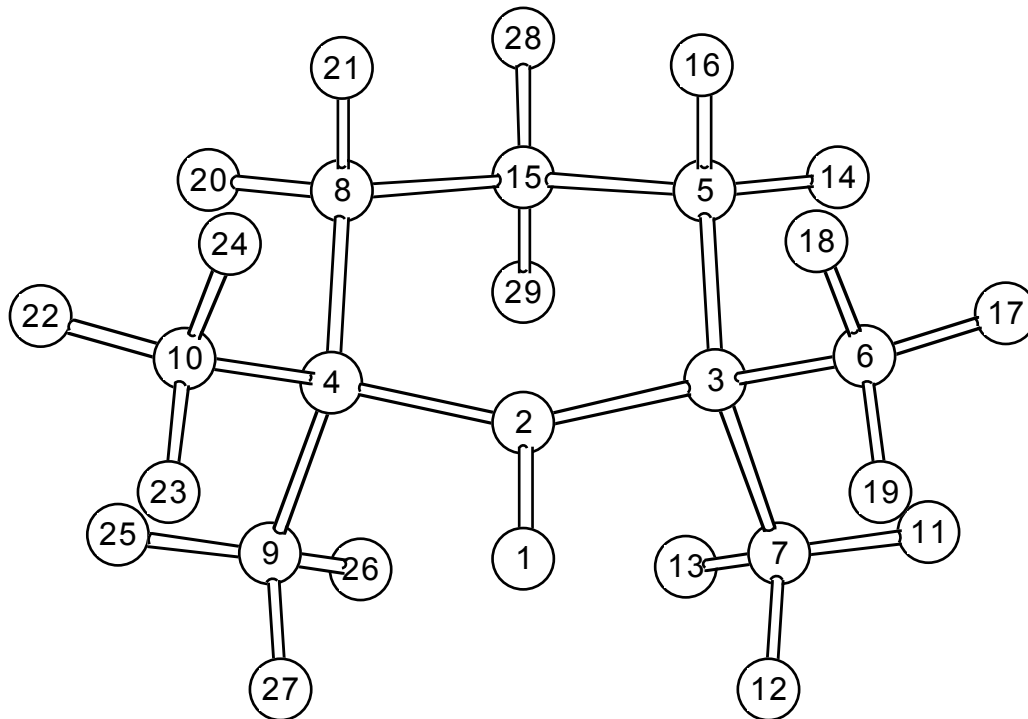

|           | X         | Y         | Z         |           | X         | Y         | Z         |         |       |
|-----------|-----------|-----------|-----------|-----------|-----------|-----------|-----------|---------|-------|
| O1        | -1.995583 | 0.069855  | 0.000000  | H16       | 1.390334  | 1.588813  | 1.228705  |         |       |
| N2        | -0.737579 | 0.201408  | 0.000000  | H17       | -0.326188 | 0.821241  | 3.286201  |         |       |
| C3        | -0.072780 | 0.025100  | 1.311094  | H18       | -0.850433 | 1.918392  | 2.003974  |         |       |
| C4        | -0.072780 | 0.025100  | -1.311094 | H19       | -1.850173 | 0.533332  | 2.433319  |         |       |
| C5        | 1.377127  | 0.496748  | 1.232278  | H20       | 1.882836  | 0.180710  | -2.144755 |         |       |
| C6        | -0.827317 | 0.877868  | 2.321269  | H21       | 1.390334  | 1.588813  | -1.228705 |         |       |
| C7        | -0.159326 | -1.441837 | 1.731134  | H22       | -0.326188 | 0.821241  | -3.286201 |         |       |
| C8        | 1.377127  | 0.496748  | -1.232278 | H23       | -1.850173 | 0.533332  | -2.433319 |         |       |
| C9        | -0.159326 | -1.441837 | -1.731134 | H24       | -0.850433 | 1.918392  | -2.003974 |         |       |
| C10       | -0.827317 | 0.877868  | -2.321269 | H25       | 0.177091  | -1.549218 | -2.761131 |         |       |
| H11       | 0.177091  | -1.549218 | 2.761131  | H26       | 0.454824  | -2.089155 | -1.110311 |         |       |
| H12       | -1.190411 | -1.780631 | 1.667432  | H27       | -1.190411 | -1.780631 | -1.667432 |         |       |
| H13       | 0.454824  | -2.089155 | 1.110311  | H28       | 3.130251  | 0.371887  | 0.000000  |         |       |
| H14       | 1.882836  | 0.180710  | 2.144755  | H29       | 2.175008  | -1.087613 | 0.000000  |         |       |
| C15       | 2.105707  | 0.000917  | 0.000000  |           |           |           |           |         |       |
| (1-2)     | 1.265     | (2-3)     | 1.481     | (3-5)     | 1.527     | (3-6)     | 1.522     | (3-7)   | 1.528 |
| (5-14)    | 1.090     | (5-15)    | 1.515     | (5-16)    | 1.092     | (6-17)    | 1.089     | (6-18)  | 1.088 |
| (6-19)    | 1.085     | (7-11)    | 1.089     | (7-12)    | 1.087     | (7-13)    | 1.087     | (15-28) | 1.090 |
| (15-29)   | 1.091     |           |           |           |           |           |           |         |       |
| (1-2-3)   | 115.7     | (3-2-4)   | 124.6     | (2-3-5)   | 110.1     | (2-3-6)   | 107.4     |         |       |
| (2-3-7)   | 109.4     | (5-3-6)   | 109.4     | (5-3-7)   | 111.4     | (6-3-7)   | 109.1     |         |       |
| (3-5-14)  | 107.9     | (3-5-15)  | 113.4     | (3-5-16)  | 108.7     | (14-5-15) | 111.3     |         |       |
| (14-5-16) | 106.7     | (15-5-16) | 108.6     | (3-6-17)  | 109.3     | (3-6-18)  | 110.7     |         |       |
| (3-6-19)  | 111.0     | (17-6-18) | 108.5     | (17-6-19) | 109.0     | (18-6-19) | 108.3     |         |       |
| (3-7-11)  | 109.7     | (3-7-12)  | 109.7     | (3-7-13)  | 112.5     | (11-7-12) | 108.5     |         |       |

|                                  |        |               |        |              |        |           |        |        |        |        |  |
|----------------------------------|--------|---------------|--------|--------------|--------|-----------|--------|--------|--------|--------|--|
| (11-7-13)                        | 107.9  | (12-7-13)     | 108.5  | (5-15-8)     | 108.9  | (5-15-28) | 109.9  |        |        |        |  |
| (5-15-29)                        | 110.9  | (28-15-29)    | 106.3  |              |        |           |        |        |        |        |  |
| (1-2-3-5)                        | -168.0 | (1-2-3-6)     | -49.0  | (1-2-3-7)    |        |           | 69.3   |        |        |        |  |
| (4-2-3-5)                        | 35.3   | (4-2-3-6)     | 154.3  | (4-2-3-7)    |        |           | -87.5  |        |        |        |  |
| (2-3-5-14)                       | -169.4 | (2-3-5-15)    | -45.7  | (2-3-5-16)   |        |           | 75.2   |        |        |        |  |
| (6-3-5-14)                       | 72.8   | (6-3-5-15)    | -163.4 | (6-3-5-16)   |        |           | -42.5  |        |        |        |  |
| (7-3-5-14)                       | -47.9  | (7-3-5-15)    | 75.9   | (7-3-5-16)   |        |           | -163.2 |        |        |        |  |
| (2-3-6-17)                       | -176.5 | (2-3-6-18)    | -57.0  | (2-3-6-19)   |        |           | 63.3   |        |        |        |  |
| (5-3-6-17)                       | -57.0  | (5-3-6-18)    | 62.5   | (5-3-6-19)   |        |           | -177.3 |        |        |        |  |
| (7-3-6-17)                       | 65.1   | (7-3-6-18)    | -175.4 | (7-3-6-19)   |        |           | -55.2  |        |        |        |  |
| (2-3-7-11)                       | -170.6 | (2-3-7-12)    | -51.5  | (2-3-7-13)   |        |           | 69.3   |        |        |        |  |
| (5-3-7-11)                       | 67.4   | (5-3-7-12)    | -173.5 | (5-3-7-13)   |        |           | -52.7  |        |        |        |  |
| (6-3-7-11)                       | -53.5  | (6-3-7-12)    | 65.7   | (6-3-7-13)   |        |           | -173.5 |        |        |        |  |
| (3-5-15-8)                       | 59.4   | (3-5-15-28)   | 179.8  | (3-5-15-29)  |        |           | -62.9  |        |        |        |  |
| (14-5-15-8)                      | -178.7 | (14-5-15-28)  | -58.2  | (14-5-15-29) |        |           | 59.0   |        |        |        |  |
| (16-5-15-8)                      | -61.6  | (16-5-15-28)  | 58.9   | (16-5-15-29) |        |           | 176.1  |        |        |        |  |
| (bond)-(plane) angle             |        | (1-2)-(3-2-4) |        | 20.8         |        |           |        |        |        |        |  |
| Frequencies (cm <sup>-1</sup> ): | 83.0   | 124.6         | 203.2  | 212.2        | 242.7  | 262.9     | 274.9  | 292.4  |        |        |  |
|                                  | 298.6  | 314.8         | 324.2  | 338.3        | 388.6  | 415.0     | 415.4  | 463.4  | 482.1  | 557.7  |  |
|                                  | 572.9  | 593.1         | 668.0  | 825.1        | 840.8  | 890.6     | 920.3  | 965.2  | 970.7  | 970.7  |  |
|                                  | 997.0  | 1019.1        | 1035.9 | 1037.1       | 1091.8 | 1108.7    | 1113.6 | 1139.5 | 1208.9 | 1245.7 |  |
|                                  | 1268.5 | 1281.0        | 1300.2 | 1319.1       | 1343.5 | 1362.0    | 1408.6 | 1425.6 | 1428.1 | 1437.9 |  |
|                                  | 1438.8 | 1449.5        | 1452.7 | 1505.4       | 1511.8 | 1518.0    | 1522.6 | 1526.3 | 1529.9 | 1532.6 |  |
|                                  | 1534.8 | 1540.6        | 1547.1 | 1547.5       | 1559.1 | 3112.9    | 3113.8 | 3125.7 | 3125.8 | 3128.6 |  |
|                                  | 3130.1 | 3132.3        | 3167.8 | 3168.5       | 3178.1 | 3207.9    | 3210.6 | 3211.8 | 3214.8 | 3226.4 |  |
|                                  | 3230.7 | 3243.4        | 3243.7 |              |        |           |        |        |        |        |  |

2,2,6,6-Tetramethyl-piperidin-1-hydroxyloxylamine (TEMPOH)  
<sup>1</sup>A' MPW1K/6-31+G(d,p) C<sub>s</sub> Geometry

|                                         |             |         |
|-----------------------------------------|-------------|---------|
| Nuclear repulsion energy                | 738.601062  | Hartree |
| MPW1K/6-31+G(d,p) energy                | -484.255451 | Hartree |
| Zero-point correction                   | 0.281964    | Hartree |
| Thermal correction to Enthalpy          | 0.294706    | Hartree |
| Thermal correction to Gibbs Free Energy | 0.246599    | Hartree |

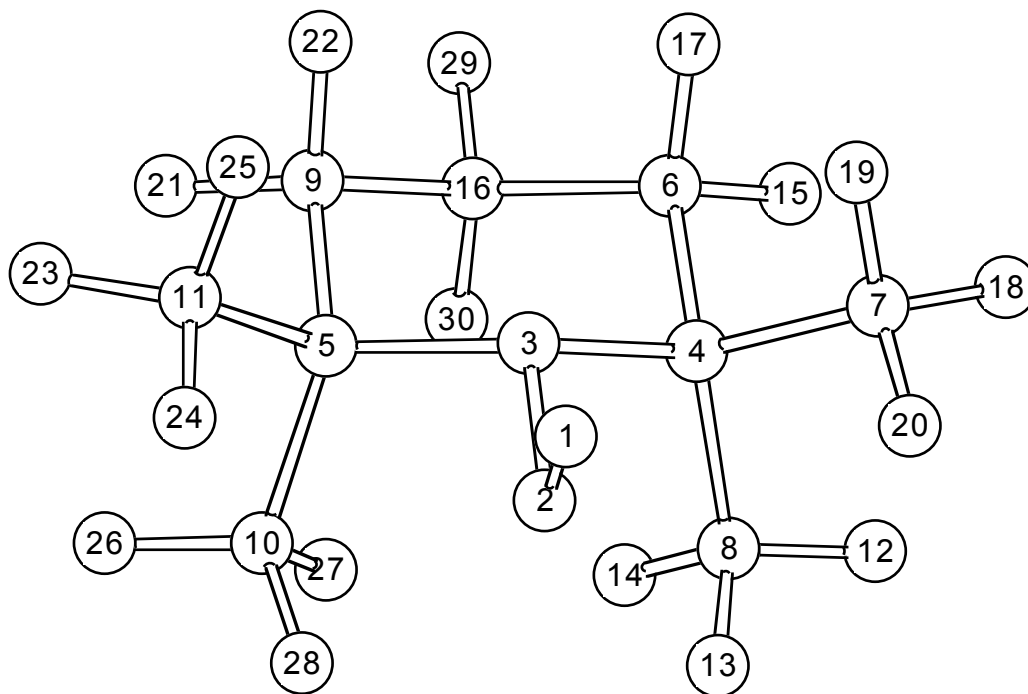

|            | X         | Y          | Z         |            | X         | Y         | Z         |        |       |
|------------|-----------|------------|-----------|------------|-----------|-----------|-----------|--------|-------|
| H1         | -2.509802 | 0.812791   | 0.000000  | C16        | 2.145223  | -0.012932 | 0.000000  |        |       |
| O2         | -2.004144 | 0.003174   | 0.000000  | H17        | 1.447394  | 1.560596  | 1.262886  |        |       |
| N3         | -0.662174 | 0.437352   | 0.000000  | H18        | -0.245618 | 0.688693  | 3.322276  |        |       |
| C4         | -0.050850 | 0.033174   | 1.276220  | H19        | -0.766434 | 1.884121  | 2.129296  |        |       |
| C5         | -0.050850 | 0.033174   | -1.276220 | H20        | -1.786577 | 0.485360  | 2.496837  |        |       |
| C6         | 1.413690  | 0.469465   | 1.237050  | H21        | 1.900913  | 0.113853  | -2.145508 |        |       |
| C7         | -0.760314 | 0.822813   | 2.371959  | H22        | 1.447394  | 1.560596  | -1.262886 |        |       |
| C8         | -0.177406 | -1.456427  | 1.605414  | H23        | -0.245618 | 0.688693  | -3.322276 |        |       |
| C9         | 1.413690  | 0.469465   | -1.237050 | H24        | -1.786577 | 0.485360  | -2.496837 |        |       |
| C10        | -0.177406 | -1.456427  | -1.605414 | H25        | -0.766434 | 1.884121  | -2.129296 |        |       |
| C11        | -0.760314 | 0.822813   | -2.371959 | H26        | 0.058033  | -1.616202 | -2.656811 |        |       |
| H12        | 0.058033  | -1.616202  | 2.656811  | H27        | 0.494639  | -2.080014 | -1.024198 |        |       |
| H13        | -1.196016 | -1.794394  | 1.432856  | H28        | -1.196016 | -1.794394 | -1.432856 |        |       |
| H14        | 0.494639  | -2.080014  | 1.024198  | H29        | 3.167233  | 0.366251  | 0.000000  |        |       |
| H15        | 1.900913  | 0.113853   | 2.145508  | H30        | 2.225506  | -1.100643 | 0.000000  |        |       |
| (1-2)      | 0.955     | (2-3)      | 1.410     | (3-4)      | 1.472     | (4-6)     | 1.529     | (4-7)  | 1.526 |
| (4-8)      | 1.531     | (6-15)     | 1.090     | (6-16)     | 1.516     | (6-17)    | 1.092     | (7-18) | 1.089 |
| (7-19)     | 1.089     | (7-20)     | 1.088     | (8-12)     | 1.089     | (8-13)    | 1.087     | (8-14) | 1.086 |
| (16-29)    | 1.090     |            |           |            |           |           |           |        |       |
| (1-2-3)    | 104.1     | (2-3-4)    | 108.1     | (4-3-5)    | 120.3     | (3-4-6)   | 107.3     |        |       |
| (3-4-7)    | 106.7     | (3-4-8)    | 114.8     | (6-4-7)    | 108.4     | (6-4-8)   | 111.3     |        |       |
| (7-4-8)    | 108.1     | (4-6-15)   | 108.3     | (4-6-16)   | 113.1     | (4-6-17)  | 108.3     |        |       |
| (15-6-16)  | 111.1     | (15-6-17)  | 107.0     | (16-6-17)  | 108.8     | (4-7-18)  | 110.1     |        |       |
| (4-7-19)   | 110.3     | (4-7-20)   | 111.1     | (18-7-19)  | 108.5     | (18-7-20) | 107.9     |        |       |
| (19-7-20)  | 108.8     | (4-8-12)   | 109.4     | (4-8-13)   | 110.2     | (4-8-14)  | 113.1     |        |       |
| (12-8-13)  | 108.1     | (12-8-14)  | 107.4     | (13-8-14)  | 108.5     | (6-16-9)  | 109.4     |        |       |
| (6-16-29)  | 110.0     | (6-16-30)  | 110.7     | (29-16-30) | 106.1     |           |           |        |       |
| (1-2-3-4)  | 114.2     | (2-3-4-6)  | 178.1     | (2-3-4-7)  |           | -65.9     |           |        |       |
| (2-3-4-8)  | 53.9      | (5-3-4-6)  | 53.4      | (5-3-4-7)  |           | 169.5     |           |        |       |
| (5-3-4-8)  | -70.8     | (3-4-6-15) | -176.0    | (3-4-6-16) |           | -52.3     |           |        |       |
| (3-4-6-17) | 68.3      | (7-4-6-15) | 69.1      | (7-4-6-16) |           | -167.3    |           |        |       |
| (7-4-6-17) | -46.6     | (8-4-6-15) | -49.6     | (8-4-6-16) |           | 74.0      |           |        |       |
| (8-4-6-17) | -165.3    | (3-4-7-18) | -170.9    | (3-4-7-19) |           | -51.2     |           |        |       |

|                                  |        |               |        |              |        |        |        |        |        |        |
|----------------------------------|--------|---------------|--------|--------------|--------|--------|--------|--------|--------|--------|
| (3-4-7-20)                       | 69.6   | (6-4-7-18)    | -55.6  | (6-4-7-19)   | 64.1   |        |        |        |        |        |
| (6-4-7-20)                       | -175.1 | (8-4-7-18)    | 65.2   | (8-4-7-19)   | -175.2 |        |        |        |        |        |
| (8-4-7-20)                       | -54.3  | (3-4-8-12)    | -165.2 | (3-4-8-13)   | -46.5  |        |        |        |        |        |
| (3-4-8-14)                       | 75.1   | (6-4-8-12)    | 72.7   | (6-4-8-13)   | -168.6 |        |        |        |        |        |
| (6-4-8-14)                       | -46.9  | (7-4-8-12)    | -46.2  | (7-4-8-13)   | 72.5   |        |        |        |        |        |
| (7-4-8-14)                       | -165.9 | (4-6-16-9)    | 56.4   | (4-6-16-29)  | 177.2  |        |        |        |        |        |
| (4-6-16-30)                      | -65.8  | (15-6-16-9)   | 178.4  | (15-6-16-29) | -60.7  |        |        |        |        |        |
| (15-6-16-30)                     | 56.2   | (17-6-16-9)   | -64.1  | (17-6-16-29) | 56.8   |        |        |        |        |        |
| (17-6-16-30)                     | 173.8  |               |        |              |        |        |        |        |        |        |
| (bond)-(plane) angle             |        | (2-3)-(4-3-5) | 51.4   |              |        |        |        |        |        |        |
| Frequencies (cm <sup>-1</sup> ): | 125.4  | 142.5         | 185.5  | 243.6        | 261.9  | 271.5  | 282.6  | 295.9  |        |        |
|                                  | 296.4  | 312.3         | 332.7  | 363.7        | 365.5  | 392.2  | 411.1  | 429.6  | 471.0  | 483.0  |
|                                  | 537.9  | 593.1         | 604.4  | 700.2        | 812.7  | 834.3  | 885.6  | 916.7  | 958.2  | 963.8  |
|                                  | 964.6  | 992.2         | 1012.6 | 1026.1       | 1026.9 | 1075.0 | 1106.7 | 1107.6 | 1117.8 | 1136.4 |
|                                  | 1211.8 | 1254.5        | 1275.2 | 1275.9       | 1300.9 | 1326.1 | 1354.0 | 1361.8 | 1387.6 | 1408.9 |
|                                  | 1424.9 | 1426.3        | 1433.0 | 1436.4       | 1444.5 | 1452.4 | 1506.0 | 1514.2 | 1515.2 | 1524.7 |
|                                  | 1527.6 | 1535.1        | 1535.9 | 1540.7       | 1550.3 | 1553.4 | 1561.3 | 3113.0 | 3113.0 | 3119.5 |
|                                  | 3120.1 | 3125.1        | 3130.6 | 3134.2       | 3162.9 | 3166.5 | 3176.0 | 3202.8 | 3204.2 | 3208.3 |
|                                  | 3213.7 | 3216.4        | 3217.0 | 3232.3       | 3242.6 | 3992.7 |        |        |        |        |

TEMPOH + TEMPO H-Bonded Complex  
<sup>2</sup>A UMPW1K/6-31+G(d,p) C<sub>1</sub> Geometry

|                                                                       |                     |
|-----------------------------------------------------------------------|---------------------|
| Nuclear repulsion energy                                              | 2098.110482 Hartree |
| UMPW1K/6-31+G(d,p) energy (<math>\langle s^2 \rangle = 0.7571</math>) | -967.903789 Hartree |
| Zero-point correction                                                 | 0.552736 Hartree    |
| Thermal correction to Enthalpy                                        | 0.579266 Hartree    |
| Thermal correction to Gibbs Free Energy                               | 0.494855 Hartree    |

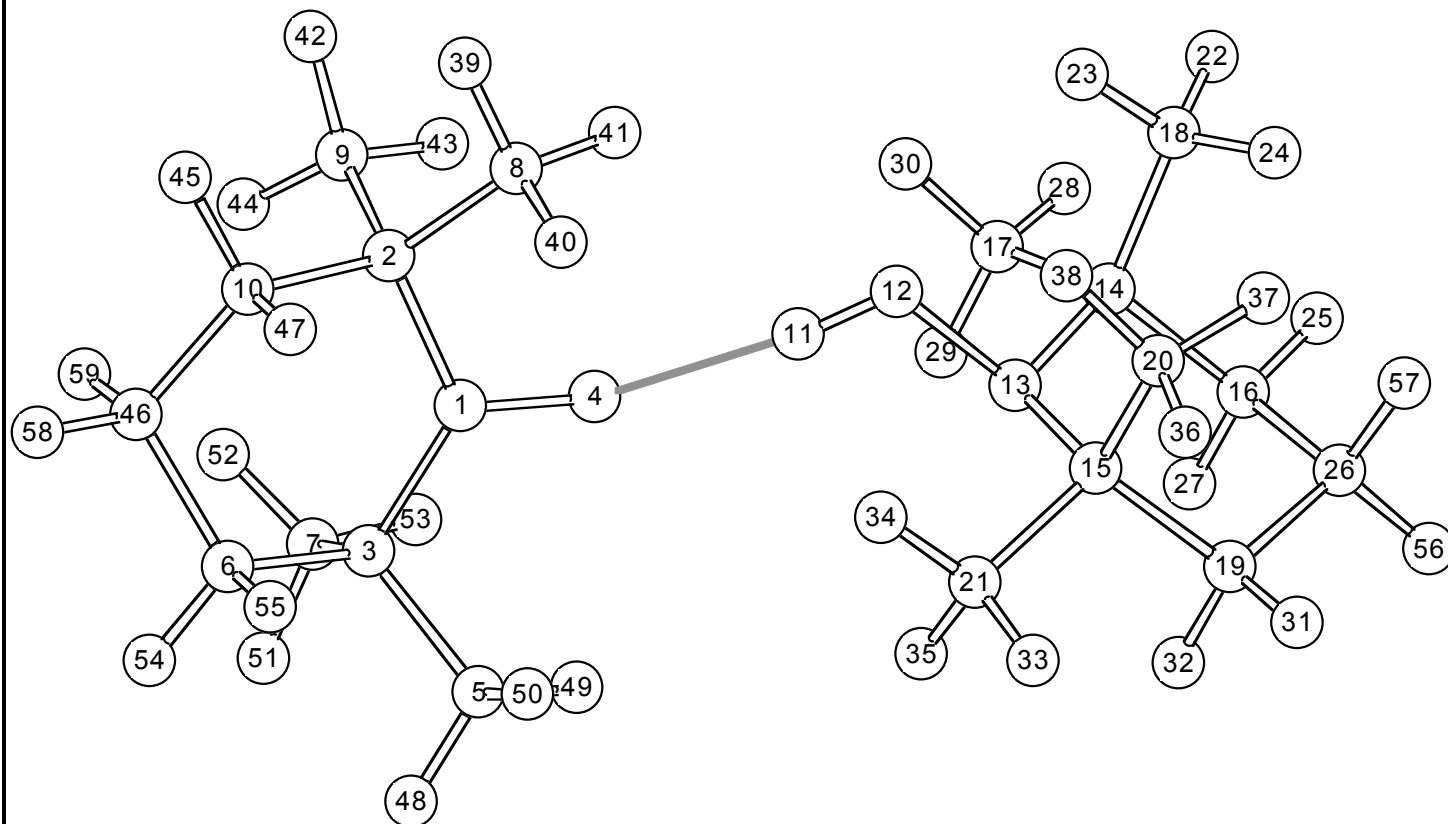

|     | X         | Y         | Z         |     | X         | Y         | Z         |
|-----|-----------|-----------|-----------|-----|-----------|-----------|-----------|
| N1  | -2.380214 | 0.033447  | 0.119788  | H31 | 4.554232  | 2.362429  | -0.832845 |
| C2  | -2.948446 | -1.123319 | -0.611768 | H32 | 3.610616  | 2.325667  | 0.646369  |
| C3  | -3.178586 | 1.116575  | 0.740855  | H33 | 2.266979  | 2.832398  | -1.762448 |
| O4  | -1.219697 | -0.124611 | 0.598487  | H34 | 1.049080  | 1.557158  | -1.794228 |
| C5  | -2.296913 | 2.356040  | 0.797813  | H35 | 1.401042  | 2.396543  | -0.280686 |
| C6  | -4.412751 | 1.409595  | -0.108432 | H36 | 3.588310  | 1.169051  | -2.909011 |
| C7  | -3.561911 | 0.707071  | 2.162277  | H37 | 4.345556  | -0.175527 | -2.077330 |
| C8  | -1.897793 | -1.610754 | -1.599054 | H38 | 2.663074  | -0.297189 | -2.589215 |
| C9  | -3.260458 | -2.241381 | 0.382270  | H39 | -2.331599 | -2.393099 | -2.219473 |
| C10 | -4.197391 | -0.691996 | -1.377098 | H40 | -1.568913 | -0.801504 | -2.247320 |
| H11 | 0.489141  | -0.431956 | -0.160174 | H41 | -1.027986 | -2.016248 | -1.092770 |
| O12 | 1.304987  | -0.677448 | -0.609830 | H42 | -3.519880 | -3.148365 | -0.161054 |
| N13 | 2.320255  | 0.018608  | 0.067468  | H43 | -2.385220 | -2.445242 | 0.993984  |
| C14 | 3.169057  | -0.960383 | 0.762271  | H44 | -4.091108 | -1.996029 | 1.038905  |
| C15 | 2.920798  | 0.980952  | -0.867090 | H45 | -4.691676 | -1.592651 | -1.740876 |
| C16 | 4.292403  | -0.188091 | 1.453761  | C46 | -5.144125 | 0.162181  | -0.559493 |
| C17 | 2.300352  | -1.609292 | 1.835494  | H47 | -3.889154 | -0.126211 | -2.258852 |
| C18 | 3.729680  | -2.071448 | -0.130445 | H48 | -2.878949 | 3.190783  | 1.184478  |
| C19 | 4.052256  | 1.696707  | -0.129486 | H49 | -1.438974 | 2.195851  | 1.442496  |
| C20 | 3.415453  | 0.374491  | -2.183772 | H50 | -1.935184 | 2.617781  | -0.194298 |
| C21 | 1.839238  | 2.005236  | -1.196779 | H51 | -4.001677 | 1.557893  | 2.679828  |
| H22 | 4.107522  | -2.882621 | 0.491090  | H52 | -4.284086 | -0.104948 | 2.181390  |

|     |          |           |           |     |           |           |           |
|-----|----------|-----------|-----------|-----|-----------|-----------|-----------|
| H23 | 2.942999 | -2.469546 | -0.766271 | H53 | -2.674636 | 0.393375  | 2.706431  |
| H24 | 4.547399 | -1.738855 | -0.762737 | H54 | -5.065854 | 2.065095  | 0.467471  |
| H25 | 4.970995 | -0.907096 | 1.914550  | H55 | -4.104435 | 1.972309  | -0.992078 |
| C26 | 5.037140 | 0.743305  | 0.517855  | H56 | 5.791435  | 1.304048  | 1.070650  |
| H27 | 3.854695 | 0.401646  | 2.261957  | H57 | 5.577226  | 0.174963  | -0.240575 |
| H28 | 2.913123 | -2.231264 | 2.487212  | H58 | -6.009319 | 0.436951  | -1.161892 |
| H29 | 1.812349 | -0.845304 | 2.437563  | H59 | -5.531230 | -0.393610 | 0.295374  |
| H30 | 1.533497 | -2.237512 | 1.389247  |     |           |           |           |

|            |        |            |        |            |        |            |       |         |       |
|------------|--------|------------|--------|------------|--------|------------|-------|---------|-------|
| (1-2)      | 1.482  | (1-3)      | 1.482  | (1-4)      | 1.265  | (2-8)      | 1.522 | (2-9)   | 1.528 |
| (2-10)     | 1.527  | (3-5)      | 1.522  | (3-6)      | 1.527  | (3-7)      | 1.528 | (4-11)  | 1.895 |
| (5-48)     | 1.089  | (5-49)     | 1.085  | (5-50)     | 1.088  | (6-46)     | 1.515 | (6-54)  | 1.090 |
| (6-55)     | 1.092  | (7-51)     | 1.089  | (7-52)     | 1.087  | (7-53)     | 1.087 | (8-39)  | 1.089 |
| (8-40)     | 1.088  | (8-41)     | 1.085  | (9-42)     | 1.089  | (9-43)     | 1.087 | (9-44)  | 1.087 |
| (10-45)    | 1.090  | (10-46)    | 1.515  | (10-47)    | 1.092  | (11-12)    | 0.963 | (12-13) | 1.405 |
| (13-14)    | 1.470  | (13-15)    | 1.470  | (14-16)    | 1.529  | (14-17)    | 1.526 | (14-18) | 1.532 |
| (15-19)    | 1.529  | (15-20)    | 1.532  | (15-21)    | 1.526  | (16-25)    | 1.091 | (16-26) | 1.516 |
| (16-27)    | 1.092  | (17-28)    | 1.090  | (17-29)    | 1.088  | (17-30)    | 1.087 | (18-22) | 1.090 |
| (18-23)    | 1.087  | (18-24)    | 1.086  | (19-26)    | 1.516  | (19-31)    | 1.091 | (19-32) | 1.092 |
| (20-36)    | 1.090  | (20-37)    | 1.086  | (20-38)    | 1.087  | (21-33)    | 1.090 | (21-34) | 1.087 |
| (21-35)    | 1.088  | (26-56)    | 1.090  | (26-57)    | 1.091  | (46-58)    | 1.089 | (46-59) | 1.091 |
| (2-1-3)    | 124.8  | (2-1-4)    | 116.2  | (3-1-4)    | 115.3  | (1-2-8)    | 107.8 |         |       |
| (1-2-9)    | 109.2  | (1-2-10)   | 109.9  | (8-2-9)    | 109.2  | (8-2-10)   | 109.3 |         |       |
| (9-2-10)   | 111.4  | (1-3-5)    | 107.4  | (1-3-6)    | 110.0  | (1-3-7)    | 109.2 |         |       |
| (5-3-6)    | 109.4  | (5-3-7)    | 109.2  | (6-3-7)    | 111.5  | (1-4-11)   | 134.1 |         |       |
| (3-5-48)   | 109.1  | (3-5-49)   | 111.1  | (3-5-50)   | 110.8  | (48-5-49)  | 109.0 |         |       |
| (48-5-50)  | 108.5  | (49-5-50)  | 108.3  | (3-6-46)   | 113.5  | (3-6-54)   | 107.8 |         |       |
| (3-6-55)   | 108.7  | (46-6-54)  | 111.3  | (46-6-55)  | 108.6  | (54-6-55)  | 106.7 |         |       |
| (3-7-51)   | 109.5  | (3-7-52)   | 112.5  | (3-7-53)   | 109.8  | (51-7-52)  | 107.9 |         |       |
| (51-7-53)  | 108.5  | (52-7-53)  | 108.5  | (2-8-39)   | 109.0  | (2-8-40)   | 110.9 |         |       |
| (2-8-41)   | 111.7  | (39-8-40)  | 108.4  | (39-8-41)  | 108.5  | (40-8-41)  | 108.3 |         |       |
| (2-9-42)   | 109.5  | (2-9-43)   | 109.8  | (2-9-44)   | 112.6  | (42-9-43)  | 108.4 |         |       |
| (42-9-44)  | 107.9  | (43-9-44)  | 108.5  | (2-10-45)  | 107.7  | (2-10-46)  | 113.6 |         |       |
| (2-10-47)  | 108.7  | (45-10-46) | 111.3  | (45-10-47) | 106.7  | (46-10-47) | 108.7 |         |       |
| (4-11-12)  | 172.7  | (11-12-13) | 105.1  | (12-13-14) | 108.4  | (12-13-15) | 108.2 |         |       |
| (14-13-15) | 120.0  | (13-14-16) | 107.6  | (13-14-17) | 106.7  | (13-14-18) | 114.8 |         |       |
| (16-14-17) | 108.4  | (16-14-18) | 111.2  | (17-14-18) | 108.1  | (13-15-19) | 107.6 |         |       |
| (13-15-20) | 114.8  | (13-15-21) | 106.7  | (19-15-20) | 111.2  | (19-15-21) | 108.3 |         |       |
| (20-15-21) | 108.0  | (14-16-25) | 108.4  | (14-16-26) | 113.1  | (14-16-27) | 108.2 |         |       |
| (25-16-26) | 111.1  | (25-16-27) | 107.0  | (26-16-27) | 108.8  | (14-17-28) | 110.1 |         |       |
| (14-17-29) | 110.2  | (14-17-30) | 111.0  | (28-17-29) | 108.8  | (28-17-30) | 108.2 |         |       |
| (29-17-30) | 108.4  | (14-18-22) | 109.5  | (14-18-23) | 110.0  | (14-18-24) | 113.1 |         |       |
| (22-18-23) | 108.2  | (22-18-24) | 107.4  | (23-18-24) | 108.5  | (15-19-26) | 113.1 |         |       |
| (15-19-31) | 108.4  | (15-19-32) | 108.2  | (26-19-31) | 111.1  | (26-19-32) | 108.8 |         |       |
| (31-19-32) | 107.0  | (15-20-36) | 109.6  | (15-20-37) | 113.1  | (15-20-38) | 110.0 |         |       |
| (36-20-37) | 107.4  | (36-20-38) | 108.2  | (37-20-38) | 108.4  | (15-21-33) | 110.1 |         |       |
| (15-21-34) | 110.9  | (15-21-35) | 110.2  | (33-21-34) | 108.2  | (33-21-35) | 108.8 |         |       |
| (34-21-35) | 108.5  | (16-26-19) | 109.3  | (16-26-56) | 110.0  | (16-26-57) | 110.6 |         |       |
| (19-26-56) | 110.0  | (19-26-57) | 110.6  | (56-26-57) | 106.1  | (6-46-10)  | 108.9 |         |       |
| (6-46-58)  | 109.9  | (6-46-59)  | 111.0  | (10-46-58) | 109.9  | (10-46-59) | 110.9 |         |       |
| (58-46-59) | 106.3  |            |        |            |        |            |       |         |       |
| (3-1-2-8)  | 154.1  | (3-1-2-9)  | -87.4  | (3-1-2-10) | 35.1   |            |       |         |       |
| (4-1-2-8)  | -48.8  | (4-1-2-9)  | 69.6   | (4-1-2-10) | -167.8 |            |       |         |       |
| (2-1-3-5)  | -154.2 | (2-1-3-6)  | -35.2  | (2-1-3-7)  | 87.5   |            |       |         |       |
| (4-1-3-5)  | 48.6   | (4-1-3-6)  | 167.6  | (4-1-3-7)  | -69.7  |            |       |         |       |
| (2-1-4-11) | 63.7   | (3-1-4-11) | -137.0 | (1-2-8-39) | -174.1 |            |       |         |       |

|                      |        |                    |        |               |        |
|----------------------|--------|--------------------|--------|---------------|--------|
| (1-2-8-40)           | -54.9  | (1-2-8-41)         | 66.0   | (9-2-8-39)    | 67.4   |
| (9-2-8-40)           | -173.4 | (9-2-8-41)         | -52.4  | (10-2-8-39)   | -54.7  |
| (10-2-8-40)          | 64.5   | (10-2-8-41)        | -174.6 | (1-2-9-42)    | -170.6 |
| (1-2-9-43)           | -51.7  | (1-2-9-44)         | 69.4   | (8-2-9-42)    | -53.0  |
| (8-2-9-43)           | 65.9   | (8-2-9-44)         | -173.0 | (10-2-9-42)   | 67.8   |
| (10-2-9-43)          | -173.3 | (10-2-9-44)        | -52.2  | (1-2-10-45)   | -169.3 |
| (1-2-10-46)          | -45.6  | (1-2-10-47)        | 75.5   | (8-2-10-45)   | 72.6   |
| (8-2-10-46)          | -163.7 | (8-2-10-47)        | -42.6  | (9-2-10-45)   | -48.1  |
| (9-2-10-46)          | 75.6   | (9-2-10-47)        | -163.3 | (1-3-5-48)    | 176.0  |
| (1-3-5-49)           | -63.8  | (1-3-5-50)         | 56.6   | (6-3-5-48)    | 56.6   |
| (6-3-5-49)           | 176.7  | (6-3-5-50)         | -62.8  | (7-3-5-48)    | -65.7  |
| (7-3-5-49)           | 54.5   | (7-3-5-50)         | 174.9  | (1-3-6-46)    | 45.6   |
| (1-3-6-54)           | 169.3  | (1-3-6-55)         | -75.4  | (5-3-6-46)    | 163.4  |
| (5-3-6-54)           | -72.9  | (5-3-6-55)         | 42.4   | (7-3-6-46)    | -75.7  |
| (7-3-6-54)           | 48.0   | (7-3-6-55)         | 163.3  | (1-3-7-51)    | 170.6  |
| (1-3-7-52)           | -69.4  | (1-3-7-53)         | 51.6   | (5-3-7-51)    | 53.5   |
| (5-3-7-52)           | 173.4  | (5-3-7-53)         | -65.6  | (6-3-7-51)    | -67.6  |
| (6-3-7-52)           | 52.4   | (6-3-7-53)         | 173.4  | (1-4-11-12)   | -49.9  |
| (3-6-46-10)          | -59.4  | (3-6-46-58)        | -179.8 | (3-6-46-59)   | 63.0   |
| (54-6-46-10)         | 178.8  | (54-6-46-58)       | 58.4   | (54-6-46-59)  | -58.8  |
| (55-6-46-10)         | 61.6   | (55-6-46-58)       | -58.8  | (55-6-46-59)  | -176.0 |
| (2-10-46-6)          | 59.4   | (2-10-46-58)       | 179.9  | (2-10-46-59)  | -62.9  |
| (45-10-46-6)         | -178.8 | (45-10-46-58)      | -58.4  | (45-10-46-59) | 58.9   |
| (47-10-46-6)         | -61.6  | (47-10-46-58)      | 58.8   | (47-10-46-59) | 176.0  |
| (4-11-12-13)         | -169.1 | (11-12-13-14)      | 112.9  | (11-12-13-15) | -115.5 |
| (12-13-14-16)        | 178.2  | (12-13-14-17)      | -65.7  | (12-13-14-18) | 53.9   |
| (15-13-14-16)        | 53.2   | (15-13-14-17)      | 169.3  | (15-13-14-18) | -71.1  |
| (12-13-15-19)        | -178.2 | (12-13-15-20)      | -53.9  | (12-13-15-21) | 65.7   |
| (14-13-15-19)        | -53.2  | (14-13-15-20)      | 71.2   | (14-13-15-21) | -169.2 |
| (13-14-16-25)        | -176.0 | (13-14-16-26)      | -52.4  | (13-14-16-27) | 68.2   |
| (17-14-16-25)        | 69.0   | (17-14-16-26)      | -167.3 | (17-14-16-27) | -46.7  |
| (18-14-16-25)        | -49.6  | (18-14-16-26)      | 74.1   | (18-14-16-27) | -165.3 |
| (13-14-17-28)        | -171.1 | (13-14-17-29)      | -51.1  | (13-14-17-30) | 69.1   |
| (16-14-17-28)        | -55.6  | (16-14-17-29)      | 64.4   | (16-14-17-30) | -175.4 |
| (18-14-17-28)        | 65.0   | (18-14-17-29)      | -175.0 | (18-14-17-30) | -54.8  |
| (13-14-18-22)        | -164.7 | (13-14-18-23)      | -45.9  | (13-14-18-24) | 75.5   |
| (16-14-18-22)        | 73.0   | (16-14-18-23)      | -168.3 | (16-14-18-24) | -46.8  |
| (17-14-18-22)        | -45.8  | (17-14-18-23)      | 72.9   | (17-14-18-24) | -165.6 |
| (13-15-19-26)        | 52.3   | (13-15-19-31)      | 175.9  | (13-15-19-32) | -68.3  |
| (20-15-19-26)        | -74.2  | (20-15-19-31)      | 49.5   | (20-15-19-32) | 165.2  |
| (21-15-19-26)        | 167.3  | (21-15-19-31)      | -69.1  | (21-15-19-32) | 46.7   |
| (13-15-20-36)        | 164.7  | (13-15-20-37)      | -75.5  | (13-15-20-38) | 45.9   |
| (19-15-20-36)        | -72.9  | (19-15-20-37)      | 46.9   | (19-15-20-38) | 168.3  |
| (21-15-20-36)        | 45.8   | (21-15-20-37)      | 165.6  | (21-15-20-38) | -73.0  |
| (13-15-21-33)        | 171.2  | (13-15-21-34)      | -69.0  | (13-15-21-35) | 51.2   |
| (19-15-21-33)        | 55.6   | (19-15-21-34)      | 175.4  | (19-15-21-35) | -64.4  |
| (20-15-21-33)        | -64.9  | (20-15-21-34)      | 54.9   | (20-15-21-35) | 175.1  |
| (14-16-26-19)        | 56.2   | (14-16-26-56)      | 177.2  | (14-16-26-57) | -65.9  |
| (25-16-26-19)        | 178.4  | (25-16-26-56)      | -60.7  | (25-16-26-57) | 56.3   |
| (27-16-26-19)        | -64.1  | (27-16-26-56)      | 56.9   | (27-16-26-57) | 173.8  |
| (15-19-26-16)        | -56.2  | (15-19-26-56)      | -177.1 | (15-19-26-57) | 65.9   |
| (31-19-26-16)        | -178.3 | (31-19-26-56)      | 60.7   | (31-19-26-57) | -56.2  |
| (32-19-26-16)        | 64.1   | (32-19-26-56)      | -56.8  | (32-19-26-57) | -173.8 |
| (bond)-(plane) angle |        | (4-1)-(2-1-3)      | 20.5   |               |        |
| (bond)-(plane) angle |        | (12-13)-(14-13-15) | 51.1   |               |        |



|                                  |        |        |        |        |        |        |        |        |
|----------------------------------|--------|--------|--------|--------|--------|--------|--------|--------|
| Frequencies (cm <sup>-1</sup> ): | 7.5    | 11.5   | 18.4   | 29.1   | 39.7   | 57.6   | 98.2   | 123.6  |
|                                  | 142.9  | 151.0  | 189.9  | 210.8  | 213.2  | 245.1  | 257.1  | 259.8  |
|                                  | 280.6  | 286.8  | 292.2  | 295.9  | 296.6  | 299.8  | 313.6  | 314.1  |
|                                  | 343.3  | 367.4  | 367.5  | 390.3  | 411.4  | 413.0  | 415.1  | 429.2  |
|                                  | 481.7  | 483.5  | 534.9  | 556.9  | 577.7  | 592.6  | 594.6  | 607.9  |
|                                  | 704.7  | 812.6  | 825.3  | 835.7  | 840.2  | 885.3  | 890.6  | 915.9  |
|                                  | 963.4  | 964.3  | 965.0  | 970.7  | 972.1  | 992.0  | 998.0  | 1012.0 |
|                                  | 1026.6 | 1035.7 | 1037.2 | 1079.3 | 1092.6 | 1106.1 | 1108.9 | 1109.5 |
|                                  | 1135.5 | 1139.2 | 1208.3 | 1212.3 | 1244.1 | 1255.2 | 1269.0 | 1274.7 |
|                                  | 1299.6 | 1299.7 | 1317.6 | 1326.9 | 1340.2 | 1354.8 | 1362.0 | 1362.7 |
|                                  | 1422.0 | 1423.7 | 1426.5 | 1429.5 | 1431.2 | 1434.7 | 1439.0 | 1440.8 |
|                                  | 1451.5 | 1454.4 | 1465.5 | 1505.0 | 1506.5 | 1512.5 | 1513.6 | 1514.0 |
|                                  | 1523.3 | 1527.1 | 1527.8 | 1532.2 | 1533.2 | 1534.5 | 1535.1 | 1538.0 |
|                                  | 1546.9 | 1548.3 | 1549.7 | 1553.1 | 1560.6 | 1561.7 | 3110.2 | 3110.7 |
|                                  | 3118.4 | 3119.3 | 3121.8 | 3127.6 | 3127.7 | 3127.9 | 3130.6 | 3131.2 |
|                                  | 3158.4 | 3162.6 | 3170.1 | 3170.9 | 3172.5 | 3180.0 | 3200.8 | 3202.7 |
|                                  | 3210.8 | 3213.2 | 3214.5 | 3217.4 | 3219.8 | 3221.1 | 3228.2 | 3230.6 |
|                                  | 3244.9 | 3245.3 | 3830.8 |        |        |        |        |        |

TEMPOH + TEMPO H-Transfer Transition Structure  
<sup>2</sup>A UMPW1K/6-31+G(d,p) C<sub>1</sub> Geometry

|                                                        |                     |
|--------------------------------------------------------|---------------------|
| Nuclear repulsion energy                               | 2158.721460 Hartree |
| UMPW1K/6-31+G(d,p) energy (<S <sup>2</sup> > = 0.7608) | -967.869274 Hartree |
| Zero-point correction                                  | 0.547159 Hartree    |
| Thermal correction to Enthalpy                         | 0.572788 Hartree    |
| Thermal correction to Gibbs Free Energy                | 0.494434 Hartree    |

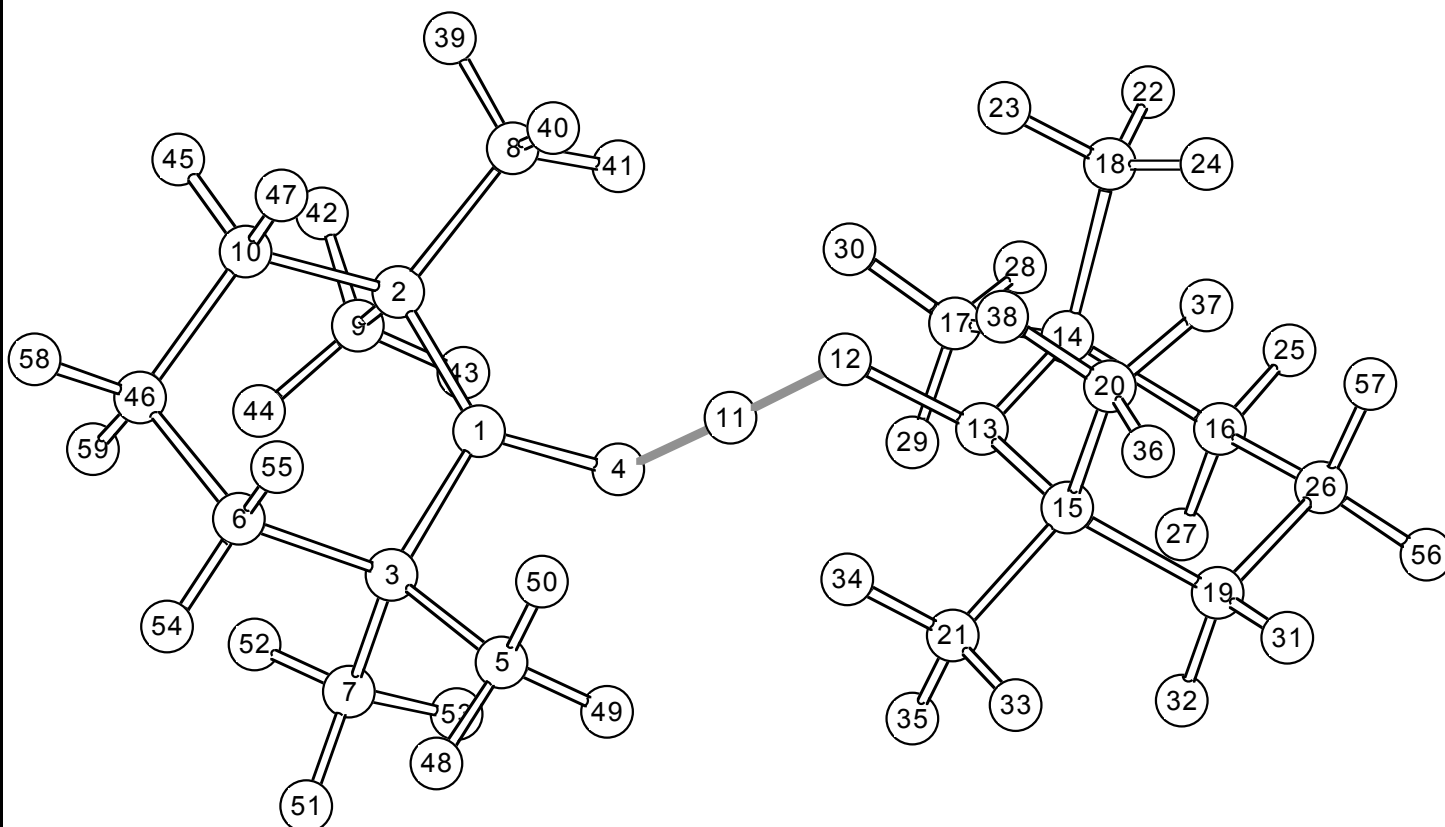

|    | X         | Y        | Z         |     | X         | Y         | Z         |
|----|-----------|----------|-----------|-----|-----------|-----------|-----------|
| N1 | -0.033899 | 2.073567 | -0.029139 | H31 | 0.167630  | -4.614533 | -2.245268 |
| C2 | -0.338847 | 2.754660 | 1.240966  | H32 | 1.547670  | -3.677994 | -1.706595 |
| C3 | 0.351238  | 2.801012 | -1.250055 | H33 | -0.305874 | -2.403886 | -3.361057 |
| O4 | 0.674348  | 0.965382 | 0.139887  | H34 | -0.804828 | -1.018301 | -2.387210 |

|     |           |           |           |     |           |           |           |
|-----|-----------|-----------|-----------|-----|-----------|-----------|-----------|
| C5  | 0.128846  | 1.866081  | -2.430830 | H35 | 0.893814  | -1.494633 | -2.433742 |
| C6  | -0.552495 | 4.020866  | -1.415676 | H36 | -2.130510 | -3.554510 | -2.209394 |
| C7  | 1.828144  | 3.204982  | -1.223130 | H37 | -2.032353 | -4.001298 | -0.513093 |
| C8  | -1.138411 | 1.784221  | 2.102060  | H38 | -2.438606 | -2.344647 | -0.960575 |
| C9  | 0.935007  | 3.141753  | 1.996671  | H39 | -1.487783 | 2.295691  | 2.997813  |
| C10 | -1.209452 | 3.977554  | 0.958065  | H40 | -1.999462 | 1.406281  | 1.555417  |
| H11 | 0.000000  | 0.000000  | 0.115303  | H41 | -0.531220 | 0.938069  | 2.406667  |
| O12 | -0.674348 | -0.965382 | 0.139887  | H42 | 0.682317  | 3.439719  | 3.013347  |
| N13 | 0.033899  | -2.073567 | -0.029139 | H43 | 1.605927  | 2.287734  | 2.044849  |
| C14 | 0.338847  | -2.754660 | 1.240966  | H44 | 1.463320  | 3.969173  | 1.531323  |
| C15 | -0.351238 | -2.801012 | -1.250055 | H45 | -1.311869 | 4.539252  | 1.886921  |
| C16 | 1.209452  | -3.977554 | 0.958065  | C46 | -0.674348 | 4.852563  | -0.156016 |
| C17 | 1.138411  | -1.784221 | 2.102060  | H47 | -2.209407 | 3.634660  | 0.684081  |
| C18 | -0.935007 | -3.141753 | 1.996671  | H48 | 0.305874  | 2.403886  | -3.361057 |
| C19 | 0.552495  | -4.020866 | -1.415676 | H49 | 0.804828  | 1.018301  | -2.387210 |
| C20 | -1.828144 | -3.204982 | -1.223130 | H50 | -0.893814 | 1.494633  | -2.433742 |
| C21 | -0.128846 | -1.866081 | -2.430830 | H51 | 2.130510  | 3.554510  | -2.209394 |
| H22 | -0.682317 | -3.439719 | 3.013347  | H52 | 2.032353  | 4.001298  | -0.513093 |
| H23 | -1.605927 | -2.287734 | 2.044849  | H53 | 2.438606  | 2.344647  | -0.960575 |
| H24 | -1.463320 | -3.969173 | 1.531323  | H54 | -0.167630 | 4.614533  | -2.245268 |
| H25 | 1.311869  | -4.539252 | 1.886921  | H55 | -1.547670 | 3.677994  | -1.706595 |
| C26 | 0.674348  | -4.852563 | -0.156016 | H56 | 1.347633  | -5.692474 | -0.326859 |
| H27 | 2.209407  | -3.634660 | 0.684081  | H57 | -0.288875 | -5.284559 | 0.118275  |
| H28 | 1.487783  | -2.295691 | 2.997813  | H58 | -1.347633 | 5.692474  | -0.326859 |
| H29 | 1.999462  | -1.406281 | 1.555417  | H59 | 0.288875  | 5.284559  | 0.118275  |
| H30 | 0.531220  | -0.938069 | 2.406667  |     |           |           |           |

|             |        |             |        |             |       |            |       |         |        |
|-------------|--------|-------------|--------|-------------|-------|------------|-------|---------|--------|
| (1-2)       | 1.473  | (1-3)       | 1.472  | (1-4)       | 1.326 | (2-8)      | 1.524 | (2-9)   | 1.531  |
| (2-10)      | 1.528  | (3-5)       | 1.522  | (3-6)       | 1.527 | (3-7)      | 1.531 | (4-11)  | 1.178  |
| (5-48)      | 1.089  | (5-49)      | 1.085  | (5-50)      | 1.088 | (6-46)     | 1.514 | (6-54)  | 1.090  |
| (6-55)      | 1.092  | (7-51)      | 1.089  | (7-52)      | 1.086 | (7-53)     | 1.087 | (8-39)  | 1.089  |
| (8-40)      | 1.088  | (8-41)      | 1.085  | (9-42)      | 1.089 | (9-43)     | 1.087 | (9-44)  | 1.086  |
| (10-45)     | 1.090  | (10-46)     | 1.514  | (10-47)     | 1.092 | (26-56)    | 1.090 | (26-57) | 1.091  |
| (2-1-3)     | 122.7  | (2-1-4)     | 112.8  | (3-1-4)     | 112.3 | (1-2-8)    |       |         | 107.5  |
| (1-2-9)     | 111.7  | (1-2-10)    | 109.2  | (8-2-9)     | 108.6 | (8-2-10)   |       |         | 108.4  |
| (9-2-10)    | 111.3  | (1-3-5)     | 107.5  | (1-3-6)     | 109.3 | (1-3-7)    |       |         | 111.6  |
| (5-3-6)     | 108.7  | (5-3-7)     | 108.5  | (6-3-7)     | 111.2 | (1-4-11)   |       |         | 112.1  |
| (3-5-48)    | 109.6  | (3-5-49)    | 111.0  | (3-5-50)    | 110.4 | (48-5-49)  |       |         | 108.6  |
| (48-5-50)   | 108.6  | (49-5-50)   | 108.6  | (3-6-46)    | 113.3 | (3-6-54)   |       |         | 108.0  |
| (3-6-55)    | 108.5  | (46-6-54)   | 111.2  | (46-6-55)   | 108.7 | (54-6-55)  |       |         | 106.9  |
| (3-7-51)    | 109.7  | (3-7-52)    | 112.7  | (3-7-53)    | 109.7 | (51-7-52)  |       |         | 107.7  |
| (51-7-53)   | 108.5  | (52-7-53)   | 108.5  | (2-8-39)    | 109.5 | (2-8-40)   |       |         | 110.6  |
| (2-8-41)    | 111.2  | (39-8-40)   | 108.8  | (39-8-41)   | 108.4 | (40-8-41)  |       |         | 108.2  |
| (2-9-42)    | 109.7  | (2-9-43)    | 109.7  | (2-9-44)    | 112.7 | (42-9-43)  |       |         | 108.5  |
| (42-9-44)   | 107.7  | (43-9-44)   | 108.5  | (2-10-45)   | 107.9 | (2-10-46)  |       |         | 113.4  |
| (2-10-47)   | 108.5  | (45-10-46)  | 111.2  | (45-10-47)  | 106.8 | (46-10-47) |       |         | 108.7  |
| (4-11-12)   | 177.6  | (16-26-19)  | 108.8  | (16-26-56)  | 110.0 | (16-26-57) |       |         | 110.8  |
| (19-26-56)  | 110.0  | (19-26-57)  | 110.8  | (56-26-57)  | 106.2 |            |       |         |        |
| (3-1-2-8)   | 160.8  | (3-1-2-9)   | -80.2  | (3-1-2-10)  |       |            |       |         | 43.4   |
| (4-1-2-8)   | -59.9  | (4-1-2-9)   | 59.1   | (4-1-2-10)  |       |            |       |         | -177.3 |
| (2-1-3-5)   | -161.2 | (2-1-3-6)   | -43.4  | (2-1-3-7)   |       |            |       |         | 80.0   |
| (4-1-3-5)   | 59.3   | (4-1-3-6)   | 177.1  | (4-1-3-7)   |       |            |       |         | -59.5  |
| (2-1-4-11)  | 98.9   | (3-1-4-11)  | -117.4 | (1-2-8-39)  |       |            |       |         | -173.0 |
| (1-2-8-40)  | -53.0  | (1-2-8-41)  | 67.3   | (9-2-8-39)  |       |            |       |         | 65.9   |
| (9-2-8-40)  | -174.1 | (9-2-8-41)  | -53.8  | (10-2-8-39) |       |            |       |         | -55.1  |
| (10-2-8-40) | 64.9   | (10-2-8-41) | -174.8 | (1-2-9-42)  |       |            |       |         | -167.7 |

|                      |        |                    |        |               |        |
|----------------------|--------|--------------------|--------|---------------|--------|
| (1-2-9-43)           | -48.7  | (1-2-9-44)         | 72.3   | (8-2-9-42)    | -49.3  |
| (8-2-9-43)           | 69.8   | (8-2-9-44)         | -169.3 | (10-2-9-42)   | 70.0   |
| (10-2-9-43)          | -171.0 | (10-2-9-44)        | -50.0  | (1-2-10-45)   | -172.5 |
| (1-2-10-46)          | -48.8  | (1-2-10-47)        | 72.1   | (8-2-10-45)   | 70.6   |
| (8-2-10-46)          | -165.7 | (8-2-10-47)        | -44.8  | (9-2-10-45)   | -48.7  |
| (9-2-10-46)          | 75.0   | (9-2-10-47)        | -164.1 | (1-3-5-48)    | 174.2  |
| (1-3-5-49)           | -65.9  | (1-3-5-50)         | 54.6   | (6-3-5-48)    | 56.1   |
| (6-3-5-49)           | 176.0  | (6-3-5-50)         | -63.5  | (7-3-5-48)    | -65.0  |
| (7-3-5-49)           | 55.0   | (7-3-5-50)         | 175.4  | (1-3-6-46)    | 48.9   |
| (1-3-6-54)           | 172.6  | (1-3-6-55)         | -72.0  | (5-3-6-46)    | 166.0  |
| (5-3-6-54)           | -70.4  | (5-3-6-55)         | 45.1   | (7-3-6-46)    | -74.7  |
| (7-3-6-54)           | 48.9   | (7-3-6-55)         | 164.4  | (1-3-7-51)    | 168.5  |
| (1-3-7-52)           | -71.5  | (1-3-7-53)         | 49.5   | (5-3-7-51)    | 50.3   |
| (5-3-7-52)           | 170.3  | (5-3-7-53)         | -68.8  | (6-3-7-51)    | -69.2  |
| (6-3-7-52)           | 50.8   | (6-3-7-53)         | 171.8  | (1-4-11-12)   | -98.4  |
| (3-6-46-10)          | -58.0  | (3-6-46-58)        | -178.7 | (3-6-46-59)   | 64.1   |
| (54-6-46-10)         | -179.9 | (54-6-46-58)       | 59.5   | (54-6-46-59)  | -57.7  |
| (55-6-46-10)         | 62.7   | (55-6-46-58)       | -57.9  | (55-6-46-59)  | -175.1 |
| (2-10-46-6)          | 58.0   | (2-10-46-58)       | 178.7  | (2-10-46-59)  | -64.1  |
| (45-10-46-6)         | 179.9  | (45-10-46-58)      | -59.4  | (45-10-46-59) | 57.8   |
| (47-10-46-6)         | -62.7  | (47-10-46-58)      | 57.9   | (47-10-46-59) | 175.1  |
| (bond)-(plane) angle |        | (4-1)-(2-1-3)      | 37.0   |               |        |
| (bond)-(plane) angle |        | (12-13)-(14-13-15) | 37.0   |               |        |

|                                  |         |        |        |        |        |        |        |        |        |        |
|----------------------------------|---------|--------|--------|--------|--------|--------|--------|--------|--------|--------|
| Frequencies( $\text{cm}^{-1}$ ): | -3138.9 | 14.7   | 26.8   | 48.1   | 58.1   | 70.0   | 107.1  | 113.6  |        |        |
|                                  | 134.6   | 135.1  | 188.9  | 201.4  | 201.6  | 237.3  | 245.7  | 251.3  | 261.7  | 263.5  |
|                                  | 277.9   | 280.3  | 296.7  | 297.4  | 298.3  | 298.7  | 313.5  | 313.7  | 324.3  | 332.6  |
|                                  | 347.8   | 348.8  | 371.5  | 375.7  | 415.7  | 420.3  | 421.9  | 424.9  | 467.1  | 471.6  |
|                                  | 483.4   | 485.4  | 534.1  | 545.7  | 552.5  | 591.5  | 596.5  | 604.7  | 681.8  | 697.4  |
|                                  | 732.6   | 817.6  | 818.4  | 838.8  | 849.9  | 888.0  | 888.2  | 918.2  | 918.7  | 961.2  |
|                                  | 962.0   | 965.4  | 965.7  | 967.1  | 967.9  | 994.9  | 995.2  | 1016.8 | 1017.3 | 1029.4 |
|                                  | 1029.8  | 1033.2 | 1034.8 | 1088.2 | 1088.6 | 1095.6 | 1108.5 | 1109.1 | 1115.2 | 1116.3 |
|                                  | 1137.1  | 1137.8 | 1210.6 | 1210.9 | 1241.5 | 1244.4 | 1264.4 | 1271.1 | 1276.6 | 1277.7 |
|                                  | 1299.5  | 1299.5 | 1303.1 | 1303.1 | 1346.5 | 1347.3 | 1360.0 | 1361.1 | 1368.4 | 1370.6 |
|                                  | 1408.8  | 1408.9 | 1423.3 | 1423.9 | 1424.2 | 1425.1 | 1435.3 | 1435.5 | 1440.4 | 1440.7 |
|                                  | 1444.5  | 1446.8 | 1451.4 | 1452.8 | 1504.7 | 1504.9 | 1512.2 | 1512.4 | 1515.4 | 1515.7 |
|                                  | 1522.4  | 1522.6 | 1523.6 | 1527.5 | 1528.8 | 1531.7 | 1532.3 | 1536.6 | 1537.4 | 1539.5 |
|                                  | 1542.7  | 1547.7 | 1547.7 | 1550.1 | 1556.0 | 1561.9 | 1711.9 | 3112.8 | 3112.9 | 3113.4 |
|                                  | 3113.5  | 3124.7 | 3125.0 | 3125.3 | 3125.7 | 3126.8 | 3127.4 | 3129.7 | 3130.3 | 3131.0 |
|                                  | 3132.9  | 3164.1 | 3164.5 | 3166.7 | 3166.7 | 3176.4 | 3176.4 | 3206.2 | 3206.6 | 3208.9 |
|                                  | 3209.3  | 3211.9 | 3212.0 | 3214.0 | 3214.3 | 3229.1 | 3229.2 | 3236.3 | 3236.4 | 3241.4 |
|                                  | 3242.9  | 3243.1 | 3244.7 |        |        |        |        |        |        |        |

Di-t-Butylhydroxylamine + Di-t-butylnitroxyl Radical Transition Structure  
 $^2B_2$  UMPW1K/6-31+G(d,p)  $C_{2h}$  Geometry

|                                                              |                     |
|--------------------------------------------------------------|---------------------|
| Nuclear repulsion energy                                     | 625.815492 Hartree  |
| UMPW1K/6-31+G(d,p) energy ( $\langle s^2 \rangle = 0.7574$ ) | -445.522224 Hartree |
| Zero-point correction                                        | 0.260563 Hartree    |
| Thermal correction to Enthalpy                               | 0.273779 Hartree    |
| Thermal correction to Gibbs Free Energy                      | 0.223461 Hartree    |

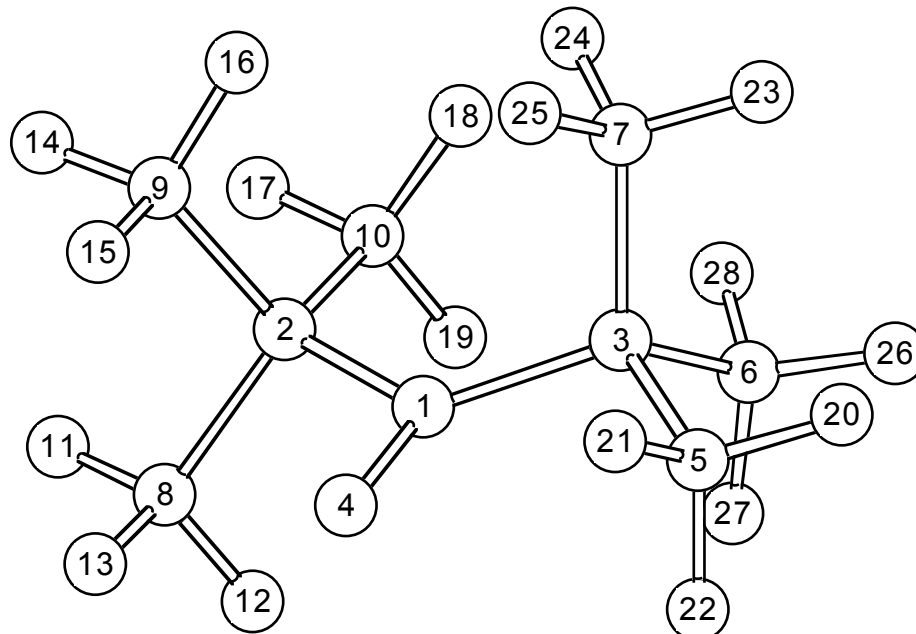

|           | X         | Y         | Z         |           | X         | Y         | Z         |         |       |
|-----------|-----------|-----------|-----------|-----------|-----------|-----------|-----------|---------|-------|
| N1        | 0.002211  | -0.522345 | -0.188039 | H15       | -1.767530 | -1.230067 | 1.617555  |         |       |
| C2        | -1.335483 | 0.111728  | -0.011964 | H16       | -1.216815 | 0.362707  | 2.149160  |         |       |
| C3        | 1.341637  | 0.109149  | -0.012134 | H17       | -2.383209 | 1.951185  | -0.136695 |         |       |
| O4        | -0.034163 | -1.786924 | -0.115320 | H18       | -0.731252 | 2.180053  | 0.386805  |         |       |
| C5        | 2.383083  | -0.983940 | -0.219226 | H19       | -1.087651 | 1.836426  | -1.313009 |         |       |
| C6        | 1.592282  | 1.193613  | -1.058919 | H20       | 3.370986  | -0.536456 | -0.127786 |         |       |
| C7        | 1.496718  | 0.667252  | 1.401188  | H21       | 2.284533  | -1.776496 | 0.514068  |         |       |
| C8        | -2.270643 | -0.569718 | -1.006992 | H22       | 2.292200  | -1.430250 | -1.205867 |         |       |
| C9        | -1.817558 | -0.164316 | 1.411281  | H23       | 2.509327  | 1.046362  | 1.530877  |         |       |
| C10       | -1.361734 | 1.607022  | -0.286744 | H24       | 0.812914  | 1.486662  | 1.606071  |         |       |
| H11       | -3.272057 | -0.155007 | -0.907249 | H25       | 1.331362  | -0.114781 | 2.139202  |         |       |
| H12       | -1.930486 | -0.404930 | -2.027789 | H26       | 2.649589  | 1.451772  | -1.048390 |         |       |
| H13       | -2.310093 | -1.638566 | -0.827588 | H27       | 1.348368  | 0.828370  | -2.054548 |         |       |
| H14       | -2.849958 | 0.163292  | 1.522209  | H28       | 1.037790  | 2.106792  | -0.877129 |         |       |
| (1-2)     | 1.491     | (1-3)     | 1.491     | (1-4)     | 1.267     | (2-8)     | 1.526     | (2-9)   | 1.528 |
| (2-10)    | 1.521     | (3-5)     | 1.524     | (3-6)     | 1.528     | (3-7)     | 1.527     | (5-20)  | 1.088 |
| (5-21)    | 1.084     | (5-22)    | 1.087     | (6-26)    | 1.088     | (6-27)    | 1.088     | (6-28)  | 1.084 |
| (7-23)    | 1.089     | (7-24)    | 1.087     | (7-25)    | 1.088     | (8-11)    | 1.088     | (8-12)  | 1.089 |
| (8-13)    | 1.085     | (9-14)    | 1.089     | (9-15)    | 1.087     | (9-16)    | 1.088     | (10-17) | 1.088 |
| (10-18)   | 1.086     | (10-19)   | 1.087     |           |           |           |           |         |       |
| (2-1-3)   | 127.7     | (2-1-4)   | 113.1     | (3-1-4)   | 116.2     | (1-2-8)   | 106.4     |         |       |
| (1-2-9)   | 108.4     | (1-2-10)  | 114.4     | (8-2-9)   | 109.5     | (8-2-10)  | 108.1     |         |       |
| (9-2-10)  | 109.9     | (1-3-5)   | 107.1     | (1-3-6)   | 111.5     | (1-3-7)   | 110.8     |         |       |
| (5-3-6)   | 107.7     | (5-3-7)   | 108.6     | (6-3-7)   | 111.0     | (3-5-20)  | 108.3     |         |       |
| (3-5-21)  | 111.7     | (3-5-22)  | 111.2     | (20-5-21) | 109.0     | (20-5-22) | 108.7     |         |       |
| (21-5-22) | 107.8     | (3-6-26)  | 108.7     | (3-6-27)  | 110.6     | (3-6-28)  | 113.5     |         |       |
| (26-6-27) | 107.8     | (26-6-28) | 107.2     | (27-6-28) | 108.8     | (3-7-23)  | 109.4     |         |       |

|                                  |        |               |        |             |        |           |        |        |        |        |
|----------------------------------|--------|---------------|--------|-------------|--------|-----------|--------|--------|--------|--------|
| (3-7-24)                         | 112.7  | (3-7-25)      | 110.5  | (23-7-24)   | 107.5  | (23-7-25) | 108.1  |        |        |        |
| (24-7-25)                        | 108.6  | (2-8-11)      | 109.5  | (2-8-12)    | 110.6  | (2-8-13)  | 110.8  |        |        |        |
| (11-8-12)                        | 108.4  | (11-8-13)     | 109.1  | (12-8-13)   | 108.4  | (2-9-14)  | 109.9  |        |        |        |
| (2-9-15)                         | 109.8  | (2-9-16)      | 111.7  | (14-9-15)   | 108.6  | (14-9-16) | 108.0  |        |        |        |
| (15-9-16)                        | 108.7  | (2-10-17)     | 107.6  | (2-10-18)   | 113.4  | (2-10-19) | 112.0  |        |        |        |
| (17-10-18)                       | 107.0  | (17-10-19)    | 107.5  | (18-10-19)  | 109.1  |           |        |        |        |        |
| (3-1-2-8)                        | 148.0  | (3-1-2-9)     | -94.3  | (3-1-2-10)  | 28.7   |           |        |        |        |        |
| (4-1-2-8)                        | -52.5  | (4-1-2-9)     | 65.1   | (4-1-2-10)  | -171.8 |           |        |        |        |        |
| (2-1-3-5)                        | 176.3  | (2-1-3-6)     | -66.1  | (2-1-3-7)   | 58.1   |           |        |        |        |        |
| (4-1-3-5)                        | 17.4   | (4-1-3-6)     | 135.0  | (4-1-3-7)   | -100.8 |           |        |        |        |        |
| (1-2-8-11)                       | 178.9  | (1-2-8-12)    | -61.6  | (1-2-8-13)  | 58.6   |           |        |        |        |        |
| (9-2-8-11)                       | 61.9   | (9-2-8-12)    | -178.6 | (9-2-8-13)  | -58.4  |           |        |        |        |        |
| (10-2-8-11)                      | -57.8  | (10-2-8-12)   | 61.6   | (10-2-8-13) | -178.1 |           |        |        |        |        |
| (1-2-9-14)                       | -171.9 | (1-2-9-15)    | -52.5  | (1-2-9-16)  | 68.3   |           |        |        |        |        |
| (8-2-9-14)                       | -56.2  | (8-2-9-15)    | 63.3   | (8-2-9-16)  | -176.0 |           |        |        |        |        |
| (10-2-9-14)                      | 62.4   | (10-2-9-15)   | -178.2 | (10-2-9-16) | -57.4  |           |        |        |        |        |
| (1-2-10-17)                      | 179.4  | (1-2-10-18)   | -62.4  | (1-2-10-19) | 61.6   |           |        |        |        |        |
| (8-2-10-17)                      | 61.1   | (8-2-10-18)   | 179.2  | (8-2-10-19) | -56.8  |           |        |        |        |        |
| (9-2-10-17)                      | -58.3  | (9-2-10-18)   | 59.8   | (9-2-10-19) | -176.2 |           |        |        |        |        |
| (1-3-5-20)                       | 178.1  | (1-3-5-21)    | -61.7  | (1-3-5-22)  | 58.8   |           |        |        |        |        |
| (6-3-5-20)                       | 58.1   | (6-3-5-21)    | 178.2  | (6-3-5-22)  | -61.3  |           |        |        |        |        |
| (7-3-5-20)                       | -62.2  | (7-3-5-21)    | 57.9   | (7-3-5-22)  | 178.5  |           |        |        |        |        |
| (1-3-6-26)                       | -166.4 | (1-3-6-27)    | -48.2  | (1-3-6-28)  | 74.4   |           |        |        |        |        |
| (5-3-6-26)                       | -49.2  | (5-3-6-27)    | 69.1   | (5-3-6-28)  | -168.4 |           |        |        |        |        |
| (7-3-6-26)                       | 69.5   | (7-3-6-27)    | -172.2 | (7-3-6-28)  | -49.7  |           |        |        |        |        |
| (1-3-7-23)                       | 175.2  | (1-3-7-24)    | -65.3  | (1-3-7-25)  | 56.4   |           |        |        |        |        |
| (5-3-7-23)                       | 57.9   | (5-3-7-24)    | 177.4  | (5-3-7-25)  | -61.0  |           |        |        |        |        |
| (6-3-7-23)                       | -60.3  | (6-3-7-24)    | 59.2   | (6-3-7-25)  | -179.1 |           |        |        |        |        |
| (bond)-(plane) angle             |        | (4-1)-(2-1-3) |        | 18.8        |        |           |        |        |        |        |
| Frequencies (cm <sup>-1</sup> ): | 56.8   | 85.2          | 184.2  | 201.4       | 228.9  | 262.1     | 266.0  | 273.7  |        |        |
|                                  | 293.1  | 306.2         | 322.8  | 334.6       | 358.2  | 375.1     | 396.2  | 420.2  | 428.9  | 447.6  |
|                                  | 553.6  | 558.5         | 563.9  | 667.1       | 830.7  | 874.8     | 959.4  | 960.3  | 965.3  | 968.6  |
|                                  | 983.9  | 988.0         | 1043.2 | 1068.2      | 1073.4 | 1081.0    | 1113.4 | 1269.2 | 1277.7 | 1285.1 |
|                                  | 1292.0 | 1314.3        | 1323.0 | 1429.7      | 1433.8 | 1438.0    | 1442.1 | 1463.7 | 1468.8 | 1506.4 |
|                                  | 1508.4 | 1516.5        | 1520.6 | 1522.9      | 1528.3 | 1529.7    | 1535.5 | 1536.5 | 1548.1 | 1551.4 |
|                                  | 1562.3 | 1570.6        | 3125.2 | 3126.3      | 3129.2 | 3132.5    | 3137.2 | 3140.1 | 3206.3 | 3207.8 |
|                                  | 3209.4 | 3209.9        | 3215.1 | 3222.6      | 3223.1 | 3231.6    | 3236.3 | 3249.7 | 3250.6 | 3251.7 |

Di-t-butylhydroxylamine  
<sup>1</sup>A MPW1K/6-31+G(d,p) C<sub>1</sub> Geometry

|                                         |                     |
|-----------------------------------------|---------------------|
| Nuclear repulsion energy                | 641.599066 Hartree  |
| UMPW1K/6-31+G(d,p) energy               | -446.135689 Hartree |
| Zero-point correction                   | 0.273057 Hartree    |
| Thermal correction to Enthalpy          | 0.286327 Hartree    |
| Thermal correction to Gibbs Free Energy | 0.236965 Hartree    |

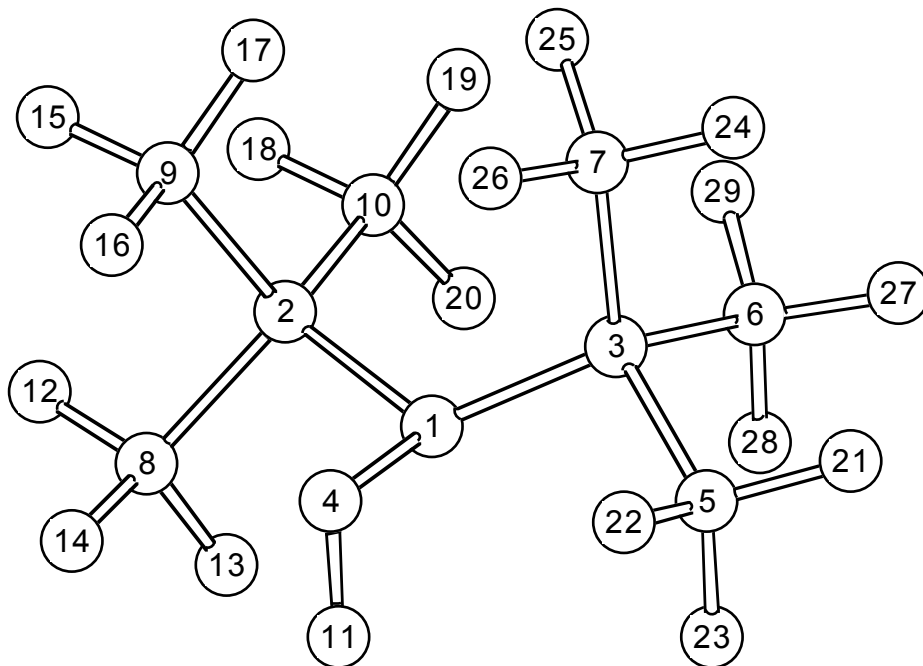

|     | X         | Y         | Z         |     | X         | Y         | Z         |
|-----|-----------|-----------|-----------|-----|-----------|-----------|-----------|
| N1  | 0.002846  | -0.419237 | -0.436265 | H16 | -1.594128 | -1.207922 | 1.643075  |
| C2  | -1.310370 | 0.140932  | -0.031270 | H17 | -1.105070 | 0.415236  | 2.131715  |
| C3  | 1.313726  | 0.135374  | -0.016326 | H18 | -2.428405 | 1.948354  | -0.154153 |
| O4  | -0.035980 | -1.771939 | -0.019767 | H19 | -0.803875 | 2.212997  | 0.434952  |
| C5  | 2.375215  | -0.862315 | -0.485710 | H20 | -1.083291 | 1.901182  | -1.286714 |
| C6  | 1.597799  | 1.437360  | -0.764335 | H21 | 3.363174  | -0.427141 | -0.349369 |
| C7  | 1.475669  | 0.339071  | 1.488367  | H22 | 2.333810  | -1.790437 | 0.075001  |
| C8  | -2.334807 | -0.529664 | -0.948358 | H23 | 2.249151  | -1.083157 | -1.545289 |
| C9  | -1.699675 | -0.150264 | 1.420673  | H24 | 2.514642  | 0.571776  | 1.719441  |
| C10 | -1.391738 | 1.640329  | -0.277161 | H25 | 0.869661  | 1.163613  | 1.856754  |
| H11 | 0.039616  | -2.266000 | -0.833054 | H26 | 1.204614  | -0.564729 | 2.029644  |
| H12 | -3.330013 | -0.132257 | -0.755626 | H27 | 2.651441  | 1.684970  | -0.647650 |
| H13 | -2.084396 | -0.345557 | -1.991605 | H28 | 1.394104  | 1.316542  | -1.826435 |
| H14 | -2.366989 | -1.602811 | -0.780202 | H29 | 1.031104  | 2.284247  | -0.397107 |
| H15 | -2.742145 | 0.126334  | 1.573326  |     |           |           |           |

|           |       |           |       |             |       |           |       |        |       |
|-----------|-------|-----------|-------|-------------|-------|-----------|-------|--------|-------|
| (1-2)     | 1.484 | (1-3)     | 1.484 | (1-4)       | 1.416 | (2-8)     | 1.530 | (2-9)  | 1.531 |
| (2-10)    | 1.522 | (3-5)     | 1.531 | (3-6)       | 1.528 | (3-7)     | 1.527 | (4-11) | 0.955 |
| (5-21)    | 1.088 | (5-22)    | 1.085 | (5-23)      | 1.090 | (6-27)    | 1.089 | (6-28) | 1.088 |
| (6-29)    | 1.083 | (7-24)    | 1.090 | (7-25)      | 1.088 | (7-26)    | 1.088 | (8-12) | 1.089 |
| (8-13)    | 1.089 | (8-14)    | 1.087 | (9-15)      | 1.089 | (9-16)    | 1.086 | (9-17) | 1.086 |
| (10-18)   | 1.088 | (10-19)   | 1.087 | (10-20)     | 1.087 |           |       |        |       |
| (2-1-3)   | 124.3 | (2-1-4)   | 104.8 | (3-1-4)     | 107.3 | (1-2-8)   |       | 105.3  |       |
| (1-2-9)   | 114.3 | (1-2-10)  | 112.0 | (8-2-9)     | 108.4 | (8-2-10)  |       | 107.4  |       |
| (9-2-10)  | 109.1 | (1-3-5)   | 106.4 | (1-3-6)     | 110.1 | (1-3-7)   |       | 115.0  |       |
| (5-3-6)   | 106.0 | (5-3-7)   | 108.4 | (6-3-7)     | 110.4 | (1-4-11)  |       | 104.0  |       |
| (3-5-21)  | 109.3 | (3-5-22)  | 111.9 | (3-5-23)    | 110.5 | (21-5-22) |       | 108.2  |       |
| (21-5-23) | 107.9 | (22-5-23) | 108.9 | S22(3-6-27) | 108.7 | (3-6-28)  |       | 110.4  |       |

|                                  |        |               |        |             |        |            |        |        |        |        |
|----------------------------------|--------|---------------|--------|-------------|--------|------------|--------|--------|--------|--------|
| (3-6-29)                         | 113.8  | (27-6-28)     | 108.1  | (27-6-29)   | 107.0  | (28-6-29)  | 108.6  |        |        |        |
| (3-7-24)                         | 109.8  | (3-7-25)      | 112.1  | (3-7-26)    | 110.7  | (24-7-25)  | 107.3  |        |        |        |
| (24-7-26)                        | 108.0  | (25-7-26)     | 108.8  | (2-8-12)    | 110.2  | (2-8-13)   | 110.3  |        |        |        |
| (2-8-14)                         | 111.1  | (12-8-13)     | 108.6  | (12-8-14)   | 107.8  | (13-8-14)  | 108.8  |        |        |        |
| (2-9-15)                         | 109.1  | (2-9-16)      | 110.8  | (2-9-17)    | 112.5  | (15-9-16)  | 108.2  |        |        |        |
| (15-9-17)                        | 107.5  | (16-9-17)     | 108.7  | (2-10-18)   | 108.2  | (2-10-19)  | 112.6  |        |        |        |
| (2-10-20)                        | 111.8  | (18-10-19)    | 107.0  | (18-10-20)  | 107.9  | (19-10-20) | 109.2  |        |        |        |
| (3-1-2-8)                        | 167.0  | (3-1-2-9)     | -74.2  | (3-1-2-10)  | 50.5   |            |        |        |        |        |
| (4-1-2-8)                        | -69.4  | (4-1-2-9)     | 49.4   | (4-1-2-10)  | 174.2  |            |        |        |        |        |
| (2-1-3-5)                        | 171.8  | (2-1-3-6)     | -73.7  | (2-1-3-7)   | 51.8   |            |        |        |        |        |
| (4-1-3-5)                        | 49.3   | (4-1-3-6)     | 163.8  | (4-1-3-7)   | -70.7  |            |        |        |        |        |
| (2-1-4-11)                       | 117.7  | (3-1-4-11)    | -108.4 | (1-2-8-12)  | -176.9 |            |        |        |        |        |
| (1-2-8-13)                       | -57.0  | (1-2-8-14)    | 63.7   | (9-2-8-12)  | 60.4   |            |        |        |        |        |
| (9-2-8-13)                       | -179.7 | (9-2-8-14)    | -59.1  | (10-2-8-12) | -57.3  |            |        |        |        |        |
| (10-2-8-13)                      | 62.5   | (10-2-8-14)   | -176.8 | (1-2-9-15)  | -169.3 |            |        |        |        |        |
| (1-2-9-16)                       | -50.3  | (1-2-9-17)    | 71.5   | (8-2-9-15)  | -52.3  |            |        |        |        |        |
| (8-2-9-16)                       | 66.7   | (8-2-9-17)    | -171.4 | (10-2-9-15) | 64.4   |            |        |        |        |        |
| (10-2-9-16)                      | -176.6 | (10-2-9-17)   | -54.8  | (1-2-10-18) | 168.6  |            |        |        |        |        |
| (1-2-10-19)                      | -73.3  | (1-2-10-20)   | 50.0   | (8-2-10-18) | 53.5   |            |        |        |        |        |
| (8-2-10-19)                      | 171.5  | (8-2-10-20)   | -65.1  | (9-2-10-18) | -63.7  |            |        |        |        |        |
| (9-2-10-19)                      | 54.3   | (9-2-10-20)   | 177.6  | (1-3-5-21)  | 170.7  |            |        |        |        |        |
| (1-3-5-22)                       | -69.5  | (1-3-5-23)    | 52.1   | (6-3-5-21)  | 53.5   |            |        |        |        |        |
| (6-3-5-22)                       | 173.3  | (6-3-5-23)    | -65.1  | (7-3-5-21)  | -65.1  |            |        |        |        |        |
| (7-3-5-22)                       | 54.7   | (7-3-5-23)    | 176.3  | (1-3-6-27)  | -165.2 |            |        |        |        |        |
| (1-3-6-28)                       | -46.8  | (1-3-6-29)    | 75.7   | (5-3-6-27)  | -50.5  |            |        |        |        |        |
| (5-3-6-28)                       | 68.0   | (5-3-6-29)    | -169.6 | (7-3-6-27)  | 66.7   |            |        |        |        |        |
| (7-3-6-28)                       | -174.8 | (7-3-6-29)    | -52.4  | (1-3-7-24)  | 169.7  |            |        |        |        |        |
| (1-3-7-25)                       | -71.1  | (1-3-7-26)    | 50.5   | (5-3-7-24)  | 50.8   |            |        |        |        |        |
| (5-3-7-25)                       | 170.0  | (5-3-7-26)    | -68.3  | (6-3-7-24)  | -64.9  |            |        |        |        |        |
| (6-3-7-25)                       | 54.2   | (6-3-7-26)    | 175.9  |             |        |            |        |        |        |        |
| (bond)-(plane) angle             |        | (4-1)-(2-1-3) | 53.6   |             |        |            |        |        |        |        |
| Frequencies (cm <sup>-1</sup> ): | 62.4   | 107.4         | 208.8  | 215.5       | 236.5  | 262.6      | 289.0  | 292.4  |        |        |
|                                  | 299.9  | 313.5         | 329.1  | 344.7       | 371.3  | 382.5      | 387.0  | 412.7  | 431.4  | 440.3  |
|                                  | 452.9  | 541.9         | 558.1  | 606.0       | 696.7  | 819.2      | 874.9  | 950.3  | 955.2  | 961.5  |
|                                  | 966.5  | 978.6         | 980.7  | 1038.1      | 1045.8 | 1066.8     | 1075.6 | 1098.9 | 1107.9 | 1278.1 |
|                                  | 1281.1 | 1290.5        | 1299.2 | 1313.1      | 1331.2 | 1383.3     | 1427.3 | 1432.0 | 1433.1 | 1437.2 |
|                                  | 1457.5 | 1466.8        | 1508.1 | 1513.7      | 1517.1 | 1527.1     | 1530.7 | 1532.4 | 1539.4 | 1543.7 |
|                                  | 1550.7 | 1556.6        | 1564.5 | 1576.9      | 3120.0 | 3122.1     | 3123.8 | 3129.0 | 3134.5 | 3136.5 |
|                                  | 3197.7 | 3201.9        | 3204.1 | 3208.6      | 3211.0 | 3215.1     | 3220.7 | 3223.5 | 3227.2 | 3236.5 |
|                                  | 3244.0 | 3257.0        | 3991.1 |             |        |            |        |        |        |        |

Di-t-Butylhydroxylamine + Di-t-butylnitroxyl Radical H-Bonded Complex  
<sup>2</sup>A UMPW1K/6-31+G(d,p) C<sub>1</sub> Geometry

|                                                        |                     |
|--------------------------------------------------------|---------------------|
| Nuclear repulsion energy                               | 1851.664989 Hartree |
| UMPW1K/6-31+G(d,p) energy (<s <sup>2</sup> > = 0.7575) | -891.665954 Hartree |
| Zero-point correction                                  | 0.534679 Hartree    |
| Thermal correction to Enthalpy                         | 0.562345 Hartree    |
| Thermal correction to Gibbs Free Energy                | 0.474967 Hartree    |

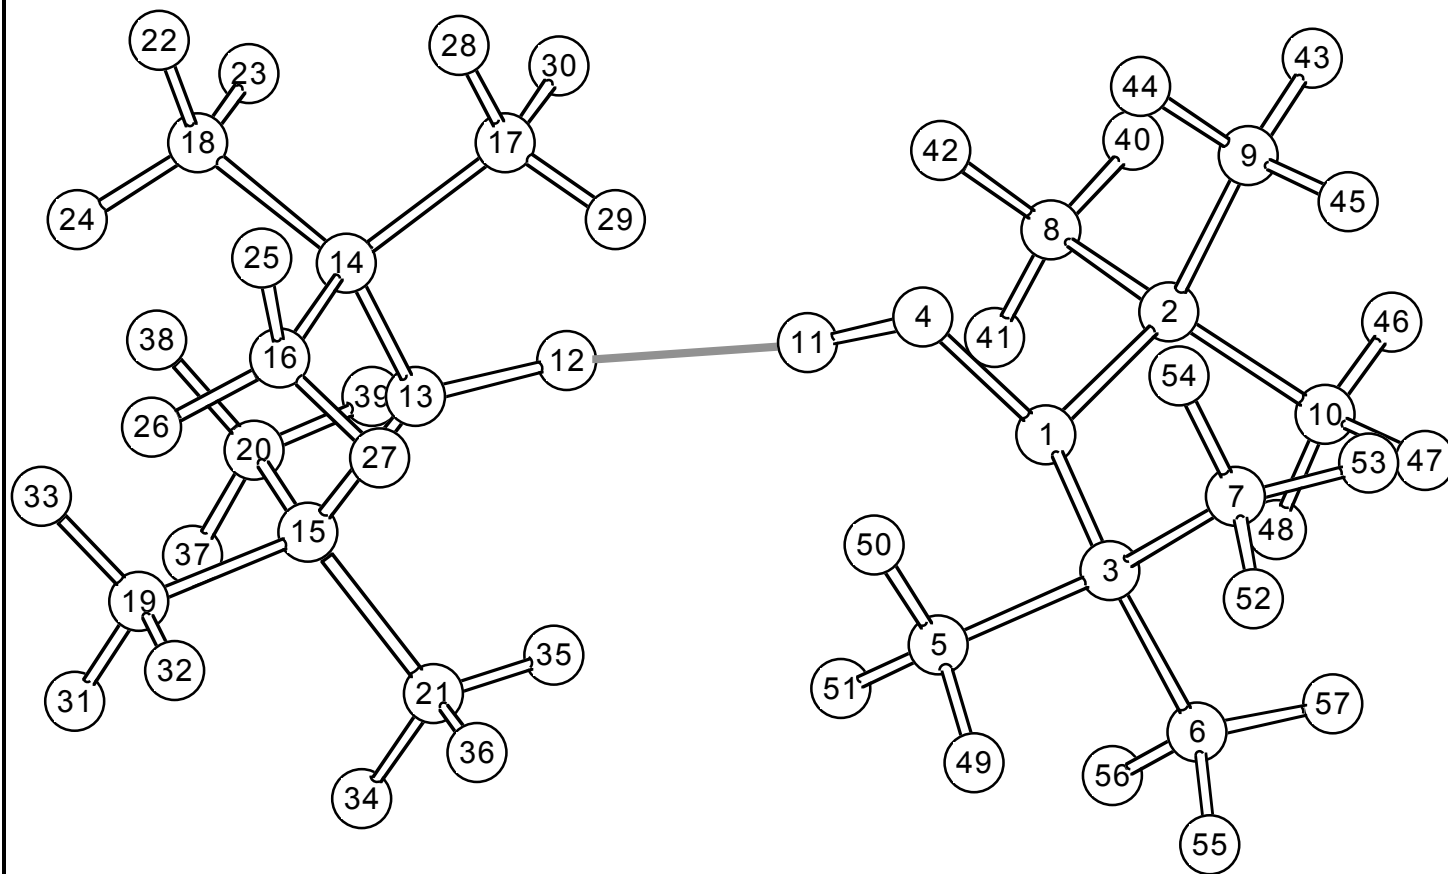

|     | X         | Y         | Z         |     | X         | Y         | Z         |
|-----|-----------|-----------|-----------|-----|-----------|-----------|-----------|
| N1  | 2.297407  | 0.099746  | 0.128371  | H30 | -1.381528 | -2.537091 | -0.211045 |
| C2  | 3.191240  | -0.751801 | 0.949936  | H31 | -4.782837 | 2.346641  | 0.601516  |
| C3  | 2.770568  | 0.984365  | -0.962212 | H32 | -4.084058 | 1.935536  | -0.953022 |
| O4  | 1.349082  | -0.785225 | -0.425771 | H33 | -5.091918 | 0.768822  | -0.082892 |
| C5  | 1.517887  | 1.504430  | -1.670963 | H34 | -2.625023 | 3.081551  | 1.369298  |
| C6  | 3.468349  | 2.215371  | -0.383362 | H35 | -1.246731 | 1.975488  | 1.444609  |
| C7  | 3.663717  | 0.309122  | -2.002055 | H36 | -1.819096 | 2.568803  | -0.114212 |
| C8  | 2.335927  | -1.207388 | 2.133721  | H37 | -3.900143 | 1.451550  | 2.745677  |
| C9  | 3.715422  | -1.996818 | 0.227943  | H38 | -4.233410 | -0.176263 | 2.164417  |
| C10 | 4.370407  | 0.026463  | 1.515698  | H39 | -2.607432 | 0.248496  | 2.712523  |
| H11 | 0.509729  | -0.539909 | -0.021756 | H40 | 2.931229  | -1.809141 | 2.819276  |
| O12 | -1.240919 | -0.280807 | 0.662730  | H41 | 1.949220  | -0.344243 | 2.672221  |
| N13 | -2.358246 | -0.038761 | 0.115543  | H42 | 1.495054  | -1.808336 | 1.799311  |
| C14 | -2.908985 | -1.098815 | -0.780681 | H43 | 4.190946  | -2.658289 | 0.951447  |
| C15 | -3.100073 | 1.071450  | 0.782451  | H44 | 2.898548  | -2.536483 | -0.241817 |
| C16 | -3.407027 | -0.505177 | -2.097300 | H45 | 4.455282  | -1.757027 | -0.530180 |
| C17 | -1.774476 | -2.062508 | -1.103614 | H46 | 4.863055  | -0.596119 | 2.260636  |
| C18 | -4.016946 | -1.876175 | -0.072833 | H47 | 5.114355  | 0.267114  | 0.760818  |
| C19 | -4.334240 | 1.538638  | 0.027113  | H48 | 4.049698  | 0.942914  | 2.005518  |
| C20 | -3.486163 | 0.613496  | 2.187730  | H49 | 1.799424  | 2.290659  | -2.369435 |
| C21 | -2.130569 | 2.246106  | 0.877482  | H50 | 1.015150  | 0.717667  | -2.223632 |



|     |           |           |           |     |          |           |           |
|-----|-----------|-----------|-----------|-----|----------|-----------|-----------|
| H22 | -4.350599 | -2.688095 | -0.716855 | H51 | 0.819720 | 1.921361  | -0.946982 |
| H23 | -3.646639 | -2.310695 | 0.853185  | H52 | 3.808895 | 0.973789  | -2.853500 |
| H24 | -4.884408 | -1.263012 | 0.154281  | H53 | 4.648117 | 0.072313  | -1.604345 |
| H25 | -3.577125 | -1.316628 | -2.802168 | H54 | 3.202440 | -0.607360 | -2.363639 |
| H26 | -4.339783 | 0.037945  | -2.001324 | H55 | 3.571113 | 2.962940  | -1.168432 |
| H27 | -2.657880 | 0.156750  | -2.526894 | H56 | 2.870824 | 2.644801  | 0.418440  |
| H28 | -2.164560 | -2.833131 | -1.765411 | H57 | 4.463412 | 2.015880  | -0.004340 |
| H29 | -0.952688 | -1.562378 | -1.608679 |     |          |           |           |

|             |       |             |        |             |        |            |       |         |       |
|-------------|-------|-------------|--------|-------------|--------|------------|-------|---------|-------|
| (1-2)       | 1.483 | (1-3)       | 1.482  | (1-4)       | 1.411  | (2-8)      | 1.530 | (2-9)   | 1.532 |
| (2-10)      | 1.522 | (3-5)       | 1.530  | (3-6)       | 1.529  | (3-7)      | 1.528 | (4-11)  | 0.963 |
| (5-49)      | 1.089 | (5-50)      | 1.085  | (5-51)      | 1.089  | (6-55)     | 1.089 | (6-56)  | 1.088 |
| (6-57)      | 1.083 | (7-52)      | 1.090  | (7-53)      | 1.088  | (7-54)     | 1.088 | (8-40)  | 1.089 |
| (8-41)      | 1.088 | (8-42)      | 1.086  | (9-43)      | 1.090  | (9-44)     | 1.086 | (9-45)  | 1.086 |
| (10-46)     | 1.089 | (10-47)     | 1.087  | (10-48)     | 1.088  | (11-12)    | 1.897 | (12-13) | 1.267 |
| (13-14)     | 1.493 | (13-15)     | 1.493  | (14-16)     | 1.528  | (14-17)    | 1.523 | (14-18) | 1.527 |
| (15-19)     | 1.521 | (15-20)     | 1.528  | (15-21)     | 1.526  | (16-25)    | 1.088 | (16-26) | 1.084 |
| (16-27)     | 1.088 | (17-28)     | 1.088  | (17-29)     | 1.087  | (17-30)    | 1.085 | (18-22) | 1.089 |
| (18-23)     | 1.088 | (18-24)     | 1.086  | (19-31)     | 1.088  | (19-32)    | 1.087 | (19-33) | 1.086 |
| (20-37)     | 1.089 | (20-38)     | 1.087  | (20-39)     | 1.087  | (21-34)    | 1.088 | (21-35) | 1.084 |
| (21-36)     | 1.088 |             |        |             |        |            |       |         |       |
| (2-1-3)     | 123.9 | (2-1-4)     | 105.2  | (3-1-4)     | 107.5  | (1-2-8)    | 105.2 |         |       |
| (1-2-9)     | 114.3 | (1-2-10)    | 112.3  | (8-2-9)     | 108.3  | (8-2-10)   | 107.3 |         |       |
| (9-2-10)    | 109.0 | (1-3-5)     | 106.4  | (1-3-6)     | 110.4  | (1-3-7)    | 115.1 |         |       |
| (5-3-6)     | 106.0 | (5-3-7)     | 108.3  | (6-3-7)     | 110.3  | (1-4-11)   | 105.1 |         |       |
| (3-5-49)    | 109.3 | (3-5-50)    | 111.6  | (3-5-51)    | 110.3  | (49-5-50)  | 108.5 |         |       |
| (49-5-51)   | 108.4 | (50-5-51)   | 108.6  | (3-6-55)    | 108.8  | (3-6-56)   | 110.2 |         |       |
| (3-6-57)    | 113.8 | (55-6-56)   | 108.2  | (55-6-57)   | 107.0  | (56-6-57)  | 108.6 |         |       |
| (3-7-52)    | 109.9 | (3-7-53)    | 112.1  | (3-7-54)    | 110.5  | (52-7-53)  | 107.3 |         |       |
| (52-7-54)   | 108.1 | (53-7-54)   | 108.8  | (2-8-40)    | 110.2  | (2-8-41)   | 110.2 |         |       |
| (2-8-42)    | 111.1 | (40-8-41)   | 108.7  | (40-8-42)   | 108.1  | (41-8-42)  | 108.4 |         |       |
| (2-9-43)    | 109.3 | (2-9-44)    | 110.5  | (2-9-45)    | 112.5  | (43-9-44)  | 108.3 |         |       |
| (43-9-45)   | 107.5 | (44-9-45)   | 108.7  | (2-10-46)   | 108.2  | (2-10-47)  | 112.7 |         |       |
| (2-10-48)   | 111.7 | (46-10-47)  | 107.0  | (46-10-48)  | 107.9  | (47-10-48) | 109.2 |         |       |
| (4-11-12)   | 171.9 | (11-12-13)  | 133.1  | (12-13-14)  | 116.7  | (12-13-15) | 112.8 |         |       |
| (14-13-15)  | 127.8 | (13-14-16)  | 111.2  | (13-14-17)  | 107.6  | (13-14-18) | 110.5 |         |       |
| (16-14-17)  | 107.8 | (16-14-18)  | 111.1  | (17-14-18)  | 108.5  | (13-15-19) | 114.2 |         |       |
| (13-15-20)  | 108.3 | (13-15-21)  | 106.5  | (19-15-20)  | 110.1  | (19-15-21) | 108.1 |         |       |
| (20-15-21)  | 109.5 | (14-16-25)  | 108.6  | (14-16-26)  | 113.5  | (14-16-27) | 110.6 |         |       |
| (25-16-26)  | 107.3 | (25-16-27)  | 107.8  | (26-16-27)  | 108.8  | (14-17-28) | 108.1 |         |       |
| (14-17-29)  | 111.8 | (14-17-30)  | 111.9  | (28-17-29)  | 108.3  | (28-17-30) | 108.7 |         |       |
| (29-17-30)  | 108.1 | (14-18-22)  | 109.1  | (14-18-23)  | 110.5  | (14-18-24) | 112.9 |         |       |
| (22-18-23)  | 108.1 | (22-18-24)  | 107.5  | (23-18-24)  | 108.6  | (15-19-31) | 107.5 |         |       |
| (15-19-32)  | 111.9 | (15-19-33)  | 113.5  | (31-19-32)  | 107.4  | (31-19-33) | 107.0 |         |       |
| (32-19-33)  | 109.2 | (15-20-37)  | 109.7  | (15-20-38)  | 111.8  | (15-20-39) | 109.9 |         |       |
| (37-20-38)  | 108.0 | (37-20-39)  | 108.6  | (38-20-39)  | 108.8  | (15-21-34) | 109.3 |         |       |
| (15-21-35)  | 111.0 | (15-21-36)  | 110.7  | (34-21-35)  | 109.0  | (34-21-36) | 108.3 |         |       |
| (35-21-36)  | 108.5 |             |        |             |        |            |       |         |       |
| (3-1-2-8)   | 166.7 | (3-1-2-9)   | -74.6  | (3-1-2-10)  | 50.3   |            |       |         |       |
| (4-1-2-8)   | -69.4 | (4-1-2-9)   | 49.3   | (4-1-2-10)  | 174.2  |            |       |         |       |
| (2-1-3-5)   | 171.6 | (2-1-3-6)   | -73.8  | (2-1-3-7)   | 51.7   |            |       |         |       |
| (4-1-3-5)   | 48.7  | (4-1-3-6)   | 163.3  | (4-1-3-7)   | -71.2  |            |       |         |       |
| (2-1-4-11)  | 113.4 | (3-1-4-11)  | -112.8 | (1-2-8-40)  | -177.5 |            |       |         |       |
| (1-2-8-41)  | -57.5 | (1-2-8-42)  | 62.6   | (9-2-8-40)  | 59.8   |            |       |         |       |
| (9-2-8-41)  | 179.8 | (9-2-8-42)  | -60.0  | (10-2-8-40) | -57.8  |            |       |         |       |
| (10-2-8-41) | 62.3  | (10-2-8-42) | -177.6 | (1-2-9-43)  | -168.8 |            |       |         |       |

|                      |        |                    |        |               |        |
|----------------------|--------|--------------------|--------|---------------|--------|
| (1-2-9-44)           | -49.7  | (1-2-9-45)         | 72.0   | (8-2-9-43)    | -51.8  |
| (8-2-9-44)           | 67.3   | (8-2-9-45)         | -171.1 | (10-2-9-43)   | 64.7   |
| (10-2-9-44)          | -176.3 | (10-2-9-45)        | -54.6  | (1-2-10-46)   | 168.6  |
| (1-2-10-47)          | -73.3  | (1-2-10-48)        | 50.0   | (8-2-10-46)   | 53.5   |
| (8-2-10-47)          | 171.5  | (8-2-10-48)        | -65.2  | (9-2-10-46)   | -63.6  |
| (9-2-10-47)          | 54.5   | (9-2-10-48)        | 177.8  | (1-3-5-49)    | 170.3  |
| (1-3-5-50)           | -69.7  | (1-3-5-51)         | 51.2   | (6-3-5-49)    | 52.9   |
| (6-3-5-50)           | 172.9  | (6-3-5-51)         | -66.3  | (7-3-5-49)    | -65.5  |
| (7-3-5-50)           | 54.6   | (7-3-5-51)         | 175.4  | (1-3-6-55)    | -165.3 |
| (1-3-6-56)           | -46.8  | (1-3-6-57)         | 75.5   | (5-3-6-55)    | -50.5  |
| (5-3-6-56)           | 68.0   | (5-3-6-57)         | -169.7 | (7-3-6-55)    | 66.5   |
| (7-3-6-56)           | -175.0 | (7-3-6-57)         | -52.7  | (1-3-7-52)    | 169.5  |
| (1-3-7-53)           | -71.3  | (1-3-7-54)         | 50.3   | (5-3-7-52)    | 50.6   |
| (5-3-7-53)           | 169.9  | (5-3-7-54)         | -68.6  | (6-3-7-52)    | -64.9  |
| (6-3-7-53)           | 54.3   | (6-3-7-54)         | 175.9  | (1-4-11-12)   | -170.2 |
| (4-11-12-13)         | -66.5  | (11-12-13-14)      | 64.6   | (11-12-13-15) | -132.7 |
| (12-13-14-16)        | -133.3 | (12-13-14-17)      | -15.5  | (12-13-14-18) | 102.8  |
| (15-13-14-16)        | 67.0   | (15-13-14-17)      | -175.1 | (15-13-14-18) | -56.9  |
| (12-13-15-19)        | 170.7  | (12-13-15-20)      | -66.2  | (12-13-15-21) | 51.5   |
| (14-13-15-19)        | -29.0  | (14-13-15-20)      | 94.1   | (14-13-15-21) | -148.2 |
| (13-14-16-25)        | 166.8  | (13-14-16-26)      | -74.0  | (13-14-16-27) | 48.7   |
| (17-14-16-25)        | 49.1   | (17-14-16-26)      | 168.3  | (17-14-16-27) | -69.0  |
| (18-14-16-25)        | -69.6  | (18-14-16-26)      | 49.6   | (18-14-16-27) | 172.3  |
| (13-14-17-28)        | -179.4 | (13-14-17-29)      | -60.3  | (13-14-17-30) | 61.0   |
| (16-14-17-28)        | -59.4  | (16-14-17-29)      | 59.7   | (16-14-17-30) | -179.0 |
| (18-14-17-28)        | 61.0   | (18-14-17-29)      | -179.9 | (18-14-17-30) | -58.6  |
| (13-14-18-22)        | -175.8 | (13-14-18-23)      | -57.1  | (13-14-18-24) | 64.8   |
| (16-14-18-22)        | 60.2   | (16-14-18-23)      | 178.9  | (16-14-18-24) | -59.2  |
| (17-14-18-22)        | -58.2  | (17-14-18-23)      | 60.5   | (17-14-18-24) | -177.6 |
| (13-15-19-31)        | -179.6 | (13-15-19-32)      | -61.9  | (13-15-19-33) | 62.3   |
| (20-15-19-31)        | 58.3   | (20-15-19-32)      | 176.1  | (20-15-19-33) | -59.8  |
| (21-15-19-31)        | -61.3  | (21-15-19-32)      | 56.5   | (21-15-19-33) | -179.4 |
| (13-15-20-37)        | 171.9  | (13-15-20-38)      | -68.4  | (13-15-20-39) | 52.6   |
| (19-15-20-37)        | -62.6  | (19-15-20-38)      | 57.1   | (19-15-20-39) | 178.1  |
| (21-15-20-37)        | 56.1   | (21-15-20-38)      | 175.8  | (21-15-20-39) | -63.2  |
| (13-15-21-34)        | -179.4 | (13-15-21-35)      | -59.1  | (13-15-21-36) | 61.4   |
| (19-15-21-34)        | 57.5   | (19-15-21-35)      | 177.7  | (19-15-21-36) | -61.7  |
| (20-15-21-34)        | -62.5  | (20-15-21-35)      | 57.7   | (20-15-21-36) | 178.3  |
| (bond)-(plane) angle |        | (4-1)-(2-1-3)      | 53.2   |               |        |
| (bond)-(plane) angle |        | (12-13)-(14-13-15) | 18.1   |               |        |

|                                  |        |        |        |        |        |        |        |        |        |        |
|----------------------------------|--------|--------|--------|--------|--------|--------|--------|--------|--------|--------|
| Frequencies (cm <sup>-1</sup> ): | 4.8    | 13.1   | 19.8   | 26.3   | 43.1   | 47.8   | 61.8   | 84.3   |        |        |
|                                  | 88.4   | 139.4  | 191.1  | 205.0  | 205.7  | 214.6  | 231.8  | 245.9  | 259.9  | 261.9  |
|                                  | 268.5  | 277.1  | 281.0  | 292.3  | 294.8  | 303.9  | 313.5  | 318.9  | 329.2  | 330.3  |
|                                  | 338.6  | 343.7  | 355.9  | 372.2  | 374.8  | 384.0  | 394.6  | 397.3  | 420.6  | 427.3  |
|                                  | 427.9  | 439.6  | 445.1  | 450.9  | 541.6  | 554.2  | 558.9  | 562.3  | 563.6  | 609.3  |
|                                  | 666.8  | 691.0  | 700.8  | 818.6  | 831.0  | 874.0  | 875.2  | 949.1  | 953.7  | 959.3  |
|                                  | 960.4  | 961.8  | 965.0  | 966.4  | 969.5  | 976.7  | 979.5  | 984.7  | 988.5  | 1038.7 |
|                                  | 1040.9 | 1055.2 | 1065.8 | 1068.4 | 1074.1 | 1074.6 | 1081.7 | 1102.6 | 1111.5 | 1117.3 |
|                                  | 1266.5 | 1274.8 | 1276.5 | 1281.4 | 1284.4 | 1290.5 | 1292.0 | 1299.2 | 1313.0 | 1313.8 |
|                                  | 1324.0 | 1330.4 | 1424.3 | 1428.2 | 1430.1 | 1431.3 | 1434.6 | 1434.9 | 1439.5 | 1443.3 |
|                                  | 1447.8 | 1454.7 | 1464.8 | 1467.5 | 1471.0 | 1506.2 | 1506.8 | 1511.1 | 1511.5 | 1516.9 |
|                                  | 1521.0 | 1521.4 | 1525.4 | 1526.7 | 1528.7 | 1529.6 | 1530.4 | 1534.5 | 1536.7 | 1537.6 |
|                                  | 1538.6 | 1541.8 | 1548.9 | 1549.7 | 1552.8 | 1556.0 | 1563.0 | 1564.3 | 1570.4 | 1575.7 |
|                                  | 3116.9 | 3120.9 | 3124.0 | 3126.0 | 3128.1 | 3128.8 | 3131.1 | 3131.6 | 3134.1 | 3134.8 |
|                                  | 3139.2 | 3142.1 | 3193.4 | 3200.5 | 3202.0 | 3205.2 | 3208.9 | 3209.3 | 3210.4 | 3211.3 |

3212.0 3212.9 3217.5 3218.5 3224.0 3224.6 3227.1 3228.2 3233.3 3236.6  
 3239.8 3241.1 3249.6 3250.9 3254.0 3254.2 3829.8

Di-*t*-Butylhydroxylamine + Di-*t*-butylnitroxyl Radical Transition Structure  
<sup>2</sup>A UMPW1K/6-31+G(d,p) C<sub>1</sub> Geometry

Nuclear repulsion energy 1903.958628 Hartree  
 UMPW1K/6-31+G(d,p) energy (<S<sup>2</sup>> = 0.7572) -891.629802 Hartree  
 Zero-point correction 0.529503 Hartree  
 Thermal correction to Enthalpy 0.556068 Hartree  
 Thermal correction to Gibbs Free Energy 0.474890 Hartree

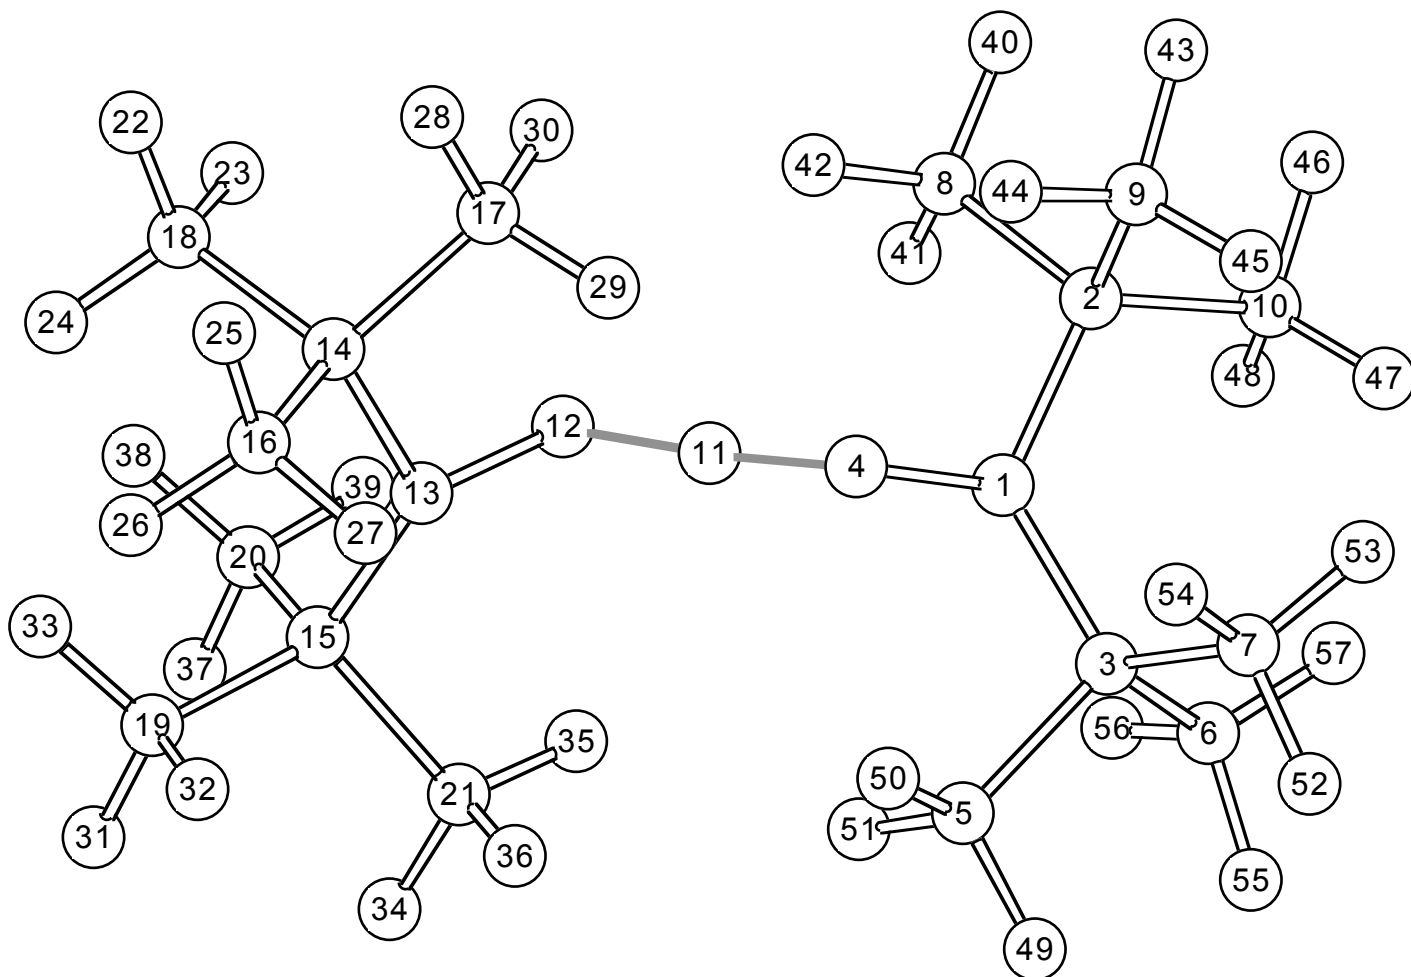

|     | X         | Y         | Z         |     | X         | Y         | Z         |
|-----|-----------|-----------|-----------|-----|-----------|-----------|-----------|
| N1  | 2.075972  | 0.059000  | 0.066169  | H30 | -1.223156 | -2.571340 | 0.059483  |
| C2  | 2.727692  | -1.168087 | 0.588628  | H31 | -4.357160 | 2.570970  | 0.191465  |
| C3  | 2.770972  | 1.220075  | -0.544594 | H32 | -3.747488 | 1.849288  | -1.290026 |
| O4  | 0.965504  | -0.262316 | -0.588947 | H33 | -4.787764 | 0.921922  | -0.197170 |
| C5  | 1.700182  | 2.167710  | -1.075600 | H34 | -2.196751 | 3.283341  | 0.859848  |
| C6  | 3.571139  | 2.000535  | 0.498637  | H35 | -0.864143 | 2.144445  | 1.065337  |
| C7  | 3.668075  | 0.810130  | -1.713861 | H36 | -1.434261 | 2.550570  | -0.556625 |
| C8  | 1.766411  | -1.758287 | 1.620072  | H37 | -3.459510 | 1.932655  | 2.446720  |
| C9  | 2.948573  | -2.193783 | -0.525811 | H38 | -3.933322 | 0.274204  | 2.109429  |
| C10 | 4.046895  | -0.897667 | 1.295892  | H39 | -2.264027 | 0.637814  | 2.557033  |
| H11 | -0.009063 | -0.210620 | 0.072834  | H40 | 2.195714  | -2.663343 | 2.046801  |
| O12 | -1.004551 | -0.257684 | 0.701897  | H41 | 1.585424  | -1.047435 | 2.423803  |
| N13 | -2.070457 | 0.039209  | -0.033535 | H42 | 0.811700  | -2.010529 | 1.170604  |
| C14 | -2.742511 | -1.160759 | -0.595816 | H43 | 3.273904  | -3.138550 | -0.092722 |
| C15 | -2.749007 | 1.226841  | 0.536901  | H44 | 2.022148  | -2.362625 | -1.066908 |
| C16 | -3.387652 | -0.837637 | -1.943739 | H45 | 3.709851  | -1.871594 | -1.231389 |

|     |           |           |           |     |          |           |           |
|-----|-----------|-----------|-----------|-----|----------|-----------|-----------|
| C17 | -1.665545 | -2.208788 | -0.862191 | H46 | 4.395012 | -1.837827 | 1.719412  |
| C18 | -3.769421 | -1.768339 | 0.361007  | H47 | 4.824913 | -0.543515 | 0.625462  |
| C19 | -3.981825 | 1.648528  | -0.247591 | H48 | 3.930844 | -0.191036 | 2.113610  |
| C20 | -3.127550 | 0.995105  | 2.002828  | H49 | 2.188800 | 3.055028  | -1.473565 |
| C21 | -1.743214 | 2.373132  | 0.471258  | H50 | 1.109790 | 1.709622  | -1.860959 |
| H22 | -4.138882 | -2.706697 | -0.051056 | H51 | 1.029342 | 2.475760  | -0.278658 |
| H23 | -3.312695 | -1.979404 | 1.325573  | H52 | 4.063793 | 1.701038  | -2.200250 |
| H24 | -4.628487 | -1.120382 | 0.515740  | H53 | 4.515991 | 0.209097  | -1.395065 |
| H25 | -3.673553 | -1.769334 | -2.428852 | H54 | 3.098242 | 0.246654  | -2.449667 |
| H26 | -4.282362 | -0.232016 | -1.864432 | H55 | 3.847509 | 2.965315  | 0.076841  |
| H27 | -2.676408 | -0.325660 | -2.588554 | H56 | 2.964932 | 2.181723  | 1.383876  |
| H28 | -2.122547 | -3.050148 | -1.379354 | H57 | 4.489149 | 1.511204  | 0.800794  |
| H29 | -0.871009 | -1.808317 | -1.487580 |     |          |           |           |

|            |       |            |       |            |       |            |       |         |       |
|------------|-------|------------|-------|------------|-------|------------|-------|---------|-------|
| (1-2)      | 1.484 | (1-3)      | 1.485 | (1-4)      | 1.329 | (2-8)      | 1.528 | (2-9)   | 1.531 |
| (2-10)     | 1.521 | (3-5)      | 1.525 | (3-6)      | 1.529 | (3-7)      | 1.530 | (4-11)  | 1.179 |
| (5-49)     | 1.088 | (5-50)     | 1.084 | (5-51)     | 1.086 | (6-55)     | 1.089 | (6-56)  | 1.088 |
| (6-57)     | 1.083 | (7-52)     | 1.089 | (7-53)     | 1.087 | (7-54)     | 1.088 | (8-40)  | 1.089 |
| (8-41)     | 1.088 | (8-42)     | 1.085 | (9-43)     | 1.089 | (9-44)     | 1.086 | (9-45)  | 1.087 |
| (10-46)    | 1.088 | (10-47)    | 1.086 | (10-48)    | 1.087 | (11-12)    | 1.179 | (12-13) | 1.329 |
| (13-14)    | 1.486 | (13-15)    | 1.482 | (14-16)    | 1.529 | (14-17)    | 1.526 | (14-18) | 1.529 |
| (15-19)    | 1.521 | (15-20)    | 1.532 | (15-21)    | 1.526 | (16-25)    | 1.089 | (16-26) | 1.083 |
| (16-27)    | 1.088 | (17-28)    | 1.088 | (17-29)    | 1.088 | (17-30)    | 1.085 | (18-22) | 1.089 |
| (18-23)    | 1.088 | (18-24)    | 1.087 | (19-31)    | 1.088 | (19-32)    | 1.087 | (19-33) | 1.086 |
| (20-37)    | 1.089 | (20-38)    | 1.086 | (20-39)    | 1.086 | (21-34)    | 1.089 | (21-35) | 1.085 |
| (21-36)    | 1.088 |            |       |            |       |            |       |         |       |
| (2-1-3)    | 125.9 | (2-1-4)    | 109.9 | (3-1-4)    | 112.2 | (1-2-8)    | 106.3 |         |       |
| (1-2-9)    | 111.2 | (1-2-10)   | 113.4 | (8-2-9)    | 108.9 | (8-2-10)   | 107.5 |         |       |
| (9-2-10)   | 109.4 | (1-3-5)    | 107.5 | (1-3-6)    | 111.3 | (1-3-7)    | 112.3 |         |       |
| (5-3-6)    | 106.7 | (5-3-7)    | 108.2 | (6-3-7)    | 110.6 | (1-4-11)   | 113.8 |         |       |
| (3-5-49)   | 108.6 | (3-5-50)   | 111.8 | (3-5-51)   | 110.8 | (49-5-50)  | 108.9 |         |       |
| (49-5-51)  | 108.3 | (50-5-51)  | 108.4 | (3-6-55)   | 108.7 | (3-6-56)   | 110.4 |         |       |
| (3-6-57)   | 113.8 | (55-6-56)  | 108.0 | (55-6-57)  | 107.1 | (56-6-57)  | 108.7 |         |       |
| (3-7-52)   | 109.6 | (3-7-53)   | 112.4 | (3-7-54)   | 110.4 | (52-7-53)  | 107.4 |         |       |
| (52-7-54)  | 108.2 | (53-7-54)  | 108.7 | (2-8-40)   | 109.7 | (2-8-41)   | 110.5 |         |       |
| (2-8-42)   | 111.3 | (40-8-41)  | 108.6 | (40-8-42)  | 108.4 | (41-8-42)  | 108.2 |         |       |
| (2-9-43)   | 109.6 | (2-9-44)   | 110.1 | (2-9-45)   | 112.0 | (43-9-44)  | 108.5 |         |       |
| (43-9-45)  | 107.8 | (44-9-45)  | 108.7 | (2-10-46)  | 107.7 | (2-10-47)  | 113.1 |         |       |
| (2-10-48)  | 111.9 | (46-10-47) | 107.0 | (46-10-48) | 107.6 | (47-10-48) | 109.2 |         |       |
| (4-11-12)  | 174.8 | (11-12-13) | 111.9 | (12-13-14) | 113.1 | (12-13-15) | 109.5 |         |       |
| (14-13-15) | 125.9 | (13-14-16) | 110.7 | (13-14-17) | 107.5 | (13-14-18) | 112.8 |         |       |
| (16-14-17) | 106.8 | (16-14-18) | 110.6 | (17-14-18) | 108.1 | (13-15-19) | 113.3 |         |       |
| (13-15-20) | 111.1 | (13-15-21) | 106.5 | (19-15-20) | 109.6 | (19-15-21) | 107.7 |         |       |
| (20-15-21) | 108.5 | (14-16-25) | 108.8 | (14-16-26) | 113.7 | (14-16-27) | 110.2 |         |       |
| (25-16-26) | 107.1 | (25-16-27) | 108.1 | (26-16-27) | 108.7 | (14-17-28) | 108.5 |         |       |
| (14-17-29) | 111.3 | (14-17-30) | 111.7 | (28-17-29) | 108.6 | (28-17-30) | 108.5 |         |       |
| (29-17-30) | 108.3 | (14-18-22) | 109.5 | (14-18-23) | 110.5 | (14-18-24) | 112.5 |         |       |
| (22-18-23) | 108.1 | (22-18-24) | 107.4 | (23-18-24) | 108.7 | (15-19-31) | 107.8 |         |       |
| (15-19-32) | 111.8 | (15-19-33) | 113.1 | (31-19-32) | 107.7 | (31-19-33) | 107.0 |         |       |
| (32-19-33) | 109.1 | (15-20-37) | 109.6 | (15-20-38) | 112.2 | (15-20-39) | 110.0 |         |       |
| (37-20-38) | 107.8 | (37-20-39) | 108.5 | (38-20-39) | 108.7 | (15-21-34) | 109.8 |         |       |
| (15-21-35) | 110.6 | (15-21-36) | 110.5 | (34-21-35) | 108.6 | (34-21-36) | 108.6 |         |       |
| (35-21-36) | 108.8 |            |       |            |       |            |       |         |       |
| (3-1-2-8)  | 155.8 | (3-1-2-9)  | -85.9 | (3-1-2-10) | 37.9  |            |       |         |       |
| (4-1-2-8)  | -65.0 | (4-1-2-9)  | 53.4  | (4-1-2-10) | 177.2 |            |       |         |       |
| (2-1-3-5)  | 173.7 | (2-1-3-6)  | -69.8 | (2-1-3-7)  | 54.8  |            |       |         |       |

|                      |        |                    |        |               |        |
|----------------------|--------|--------------------|--------|---------------|--------|
| (4-1-3-5)            | 35.2   | (4-1-3-6)          | 151.8  | (4-1-3-7)     | -83.6  |
| (2-1-4-11)           | 94.3   | (3-1-4-11)         | -120.6 | (1-2-8-40)    | -179.6 |
| (1-2-8-41)           | -59.8  | (1-2-8-42)         | 60.4   | (9-2-8-40)    | 60.6   |
| (9-2-8-41)           | -179.7 | (9-2-8-42)         | -59.5  | (10-2-8-40)   | -57.9  |
| (10-2-8-41)          | 61.9   | (10-2-8-42)        | -177.9 | (1-2-9-43)    | -170.8 |
| (1-2-9-44)           | -51.5  | (1-2-9-45)         | 69.6   | (8-2-9-43)    | -54.0  |
| (8-2-9-44)           | 65.3   | (8-2-9-45)         | -173.6 | (10-2-9-43)   | 63.2   |
| (10-2-9-44)          | -177.5 | (10-2-9-45)        | -56.5  | (1-2-10-46)   | 174.8  |
| (1-2-10-47)          | -67.1  | (1-2-10-48)        | 56.7   | (8-2-10-46)   | 57.6   |
| (8-2-10-47)          | 175.7  | (8-2-10-48)        | -60.5  | (9-2-10-46)   | -60.4  |
| (9-2-10-47)          | 57.6   | (9-2-10-48)        | -178.6 | (1-3-5-49)    | 176.6  |
| (1-3-5-50)           | -63.2  | (1-3-5-51)         | 57.8   | (6-3-5-49)    | 57.1   |
| (6-3-5-50)           | 177.3  | (6-3-5-51)         | -61.7  | (7-3-5-49)    | -61.9  |
| (7-3-5-50)           | 58.3   | (7-3-5-51)         | 179.3  | (1-3-6-55)    | -165.6 |
| (1-3-6-56)           | -47.3  | (1-3-6-57)         | 75.2   | (5-3-6-55)    | -48.6  |
| (5-3-6-56)           | 69.7   | (5-3-6-57)         | -167.8 | (7-3-6-55)    | 68.8   |
| (7-3-6-56)           | -172.9 | (7-3-6-57)         | -50.4  | (1-3-7-52)    | 173.5  |
| (1-3-7-53)           | -67.1  | (1-3-7-54)         | 54.4   | (5-3-7-52)    | 55.0   |
| (5-3-7-53)           | 174.4  | (5-3-7-54)         | -64.0  | (6-3-7-52)    | -61.5  |
| (6-3-7-53)           | 57.9   | (6-3-7-54)         | 179.4  | (1-4-11-12)   | -128.0 |
| (4-11-12-13)         | -83.4  | (11-12-13-14)      | 94.4   | (11-12-13-15) | -119.9 |
| (12-13-14-16)        | -148.7 | (12-13-14-17)      | -32.3  | (12-13-14-18) | 86.7   |
| (15-13-14-16)        | 72.3   | (15-13-14-17)      | -171.4 | (15-13-14-18) | -52.3  |
| (12-13-15-19)        | 179.6  | (12-13-15-20)      | -56.5  | (12-13-15-21) | 61.5   |
| (14-13-15-19)        | -40.2  | (14-13-15-20)      | 83.7   | (14-13-15-21) | -158.3 |
| (13-14-16-25)        | 167.5  | (13-14-16-26)      | -73.2  | (13-14-16-27) | 49.2   |
| (17-14-16-25)        | 50.7   | (17-14-16-26)      | 170.0  | (17-14-16-27) | -67.6  |
| (18-14-16-25)        | -66.6  | (18-14-16-26)      | 52.7   | (18-14-16-27) | 175.0  |
| (13-14-17-28)        | -173.6 | (13-14-17-29)      | -54.2  | (13-14-17-30) | 66.9   |
| (16-14-17-28)        | -54.7  | (16-14-17-29)      | 64.7   | (16-14-17-30) | -174.2 |
| (18-14-17-28)        | 64.3   | (18-14-17-29)      | -176.3 | (18-14-17-30) | -55.1  |
| (13-14-18-22)        | -173.2 | (13-14-18-23)      | -54.3  | (13-14-18-24) | 67.5   |
| (16-14-18-22)        | 62.2   | (16-14-18-23)      | -178.9 | (16-14-18-24) | -57.2  |
| (17-14-18-22)        | -54.4  | (17-14-18-23)      | 64.5   | (17-14-18-24) | -173.8 |
| (13-15-19-31)        | -175.1 | (13-15-19-32)      | -56.9  | (13-15-19-33) | 66.8   |
| (20-15-19-31)        | 60.2   | (20-15-19-32)      | 178.4  | (20-15-19-33) | -57.9  |
| (21-15-19-31)        | -57.7  | (21-15-19-32)      | 60.6   | (21-15-19-33) | -175.8 |
| (13-15-20-37)        | 170.0  | (13-15-20-38)      | -70.4  | (13-15-20-39) | 50.8   |
| (19-15-20-37)        | -64.1  | (19-15-20-38)      | 55.6   | (19-15-20-39) | 176.7  |
| (21-15-20-37)        | 53.2   | (21-15-20-38)      | 172.9  | (21-15-20-39) | -65.9  |
| (13-15-21-34)        | 178.8  | (13-15-21-35)      | -61.5  | (13-15-21-36) | 59.0   |
| (19-15-21-34)        | 57.0   | (19-15-21-35)      | 176.8  | (19-15-21-36) | -62.7  |
| (20-15-21-34)        | -61.5  | (20-15-21-35)      | 58.2   | (20-15-21-36) | 178.7  |
| (bond)-(plane) angle |        | (4-1)-(2-1-3)      | 37.9   |               |        |
| (bond)-(plane) angle |        | (12-13)-(14-13-15) | 37.1   |               |        |

|                                  |         |        |        |        |        |        |        |        |        |        |
|----------------------------------|---------|--------|--------|--------|--------|--------|--------|--------|--------|--------|
| Frequencies (cm <sup>-1</sup> ): | -3238.1 | 11.4   | 27.9   | 38.5   | 63.4   | 65.1   | 86.1   | 92.1   |        |        |
|                                  | 109.8   | 113.6  | 175.8  | 198.5  | 208.8  | 218.6  | 222.9  | 242.4  | 263.2  | 268.7  |
|                                  | 272.2   | 277.1  | 291.8  | 293.2  | 299.4  | 304.4  | 310.9  | 313.9  | 326.3  | 334.4  |
|                                  | 335.5   | 340.1  | 369.6  | 372.9  | 379.7  | 388.0  | 395.0  | 400.7  | 421.2  | 423.2  |
|                                  | 433.6   | 438.4  | 440.9  | 445.9  | 516.9  | 552.9  | 554.5  | 557.4  | 578.5  | 597.9  |
|                                  | 679.1   | 682.8  | 728.7  | 824.7  | 826.2  | 874.1  | 878.7  | 952.7  | 953.9  | 954.8  |
|                                  | 955.4   | 964.3  | 964.8  | 966.7  | 967.3  | 979.6  | 983.0  | 985.2  | 986.3  | 1042.9 |
|                                  | 1044.9  | 1067.4 | 1068.2 | 1073.2 | 1073.8 | 1077.4 | 1080.4 | 1107.7 | 1109.9 | 1160.4 |
|                                  | 1261.7  | 1266.2 | 1275.7 | 1277.9 | 1281.5 | 1284.6 | 1288.9 | 1295.7 | 1297.8 | 1298.6 |
|                                  | 1310.1  | 1312.8 | 1364.3 | 1369.2 | 1425.6 | 1425.7 | 1429.7 | 1430.1 | 1435.1 | 1436.1 |

1441.6 1442.5 1460.6 1460.9 1468.4 1468.7 1506.4 1507.5 1508.8 1510.9  
 1519.2 1519.5 1522.6 1525.2 1525.6 1527.1 1527.8 1532.9 1535.9 1537.5  
 1538.6 1541.8 1547.2 1549.5 1552.7 1553.0 1562.0 1564.9 1571.3 1573.7  
 1693.1 3121.3 3121.5 3126.3 3126.7 3129.4 3129.7 3130.9 3132.4 3134.7  
 3135.5 3137.7 3141.0 3201.6 3201.8 3206.5 3207.0 3208.0 3208.6 3210.1  
 3210.7 3214.7 3215.5 3218.1 3221.4 3221.5 3224.4 3231.0 3231.6 3237.9  
 3238.1 3240.3 3243.4 3245.7 3254.4 3255.2 3257.2

Diphenylnitroxyl Radical  
<sup>2</sup>B UMPW1K/6-31+G(d,p) C<sub>2</sub> Geometry

Nuclear repulsion energy 806.316437 Hartree  
 UMPW1K/6-31+G(d,p) energy (<s<sup>2</sup>> = 0.7831) -593.059542 Hartree  
 Zero-point correction 0.196104 Hartree  
 Thermal correction to Enthalpy 0.207610 Hartree  
 Thermal correction to Gibbs Free Energy 0.158664 Hartree

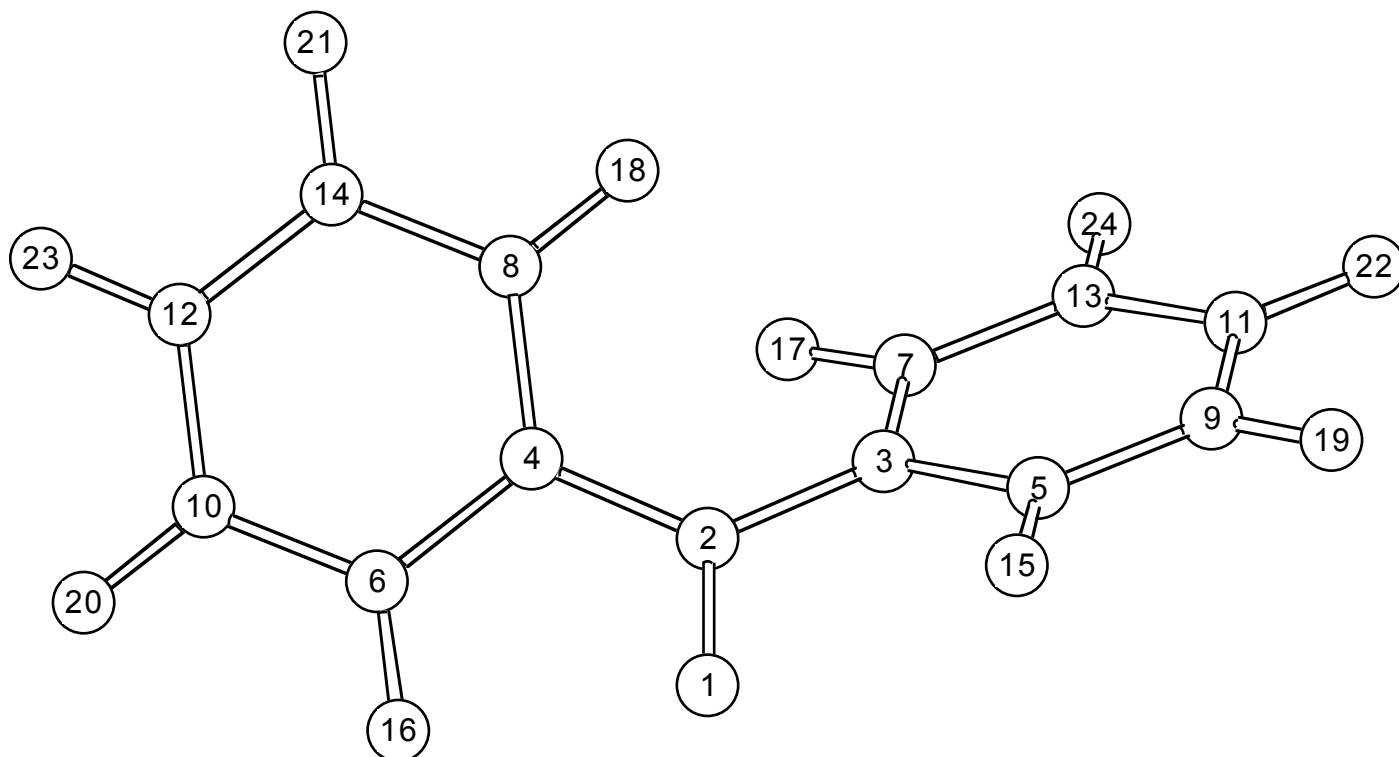

|     | X         | Y         | Z         |     | X         | Y         | Z         |
|-----|-----------|-----------|-----------|-----|-----------|-----------|-----------|
| O1  | 0.000000  | 0.000000  | 2.255414  | C13 | 0.632898  | 2.655096  | -1.509824 |
| N2  | 0.000000  | 0.000000  | 0.990804  | C14 | -0.632898 | -2.655096 | -1.509824 |
| C3  | 0.000000  | 1.244097  | 0.322570  | H15 | -1.042829 | 2.182266  | 1.927273  |
| C4  | 0.000000  | -1.244097 | 0.322570  | H16 | 1.042829  | -2.182266 | 1.927273  |
| C5  | -0.589367 | 2.330268  | 0.960696  | H17 | 1.116380  | 0.572664  | -1.385386 |
| C6  | 0.589367  | -2.330268 | 0.960696  | H18 | -1.116380 | -0.572664 | -1.385386 |
| C7  | 0.624490  | 1.406789  | -0.910255 | H19 | -1.038443 | 4.411138  | 0.843809  |
| C8  | -0.624490 | -1.406789 | -0.910255 | H20 | 1.038443  | -4.411138 | 0.843809  |
| C9  | -0.573846 | 3.570940  | 0.349721  | H21 | -1.124770 | -2.780813 | -2.462810 |
| C10 | 0.573846  | -3.570940 | 0.349721  | H22 | 0.041227  | 4.709963  | -1.360859 |
| C11 | 0.031475  | 3.739507  | -0.888158 | H23 | -0.041227 | -4.709963 | -1.360859 |
| C12 | -0.031475 | -3.739507 | -0.888158 | H24 | 1.124770  | 2.780813  | -2.462810 |

(1-2) 1.265 (2-3) 1.412 (3-5) 1.391 (3-7) 1.392 (5-9) 1.383  
 (5-15) 1.078 (7-13) 1.385 (7-17) 1.079 (9-11) 1.388 (9-19) 1.080  
 (11-13) 1.387 (11-22) 1.080 (13-24) 1.080  
 (1-2-3) 118.2 (3-2-4) 123.5 (2-3-5) 118.1 (2-3-7) 121.5  
 (5-3-7) 120.4 (3-5-9) 119.5 (3-5-15) 118.8 (9-5-15) 121.6

|                      |        |               |        |              |        |            |       |
|----------------------|--------|---------------|--------|--------------|--------|------------|-------|
| (3-7-13)             | 119.5  | (3-7-17)      | 120.3  | (13-7-17)    | 120.2  | (5-9-11)   | 120.5 |
| (5-9-19)             | 119.4  | (11-9-19)     | 120.1  | (9-11-13)    | 119.6  | (9-11-22)  | 120.2 |
| (13-11-22)           | 120.2  | (7-13-11)     | 120.5  | (7-13-24)    | 119.3  | (11-13-24) | 120.1 |
| (1-2-3-5)            | -28.7  | (1-2-3-7)     | 148.2  | (4-2-3-5)    | 151.3  |            |       |
| (4-2-3-7)            | -31.8  | (2-3-5-9)     | 178.2  | (2-3-5-15)   | -1.4   |            |       |
| (7-3-5-9)            | 1.2    | (7-3-5-15)    | -178.3 | (2-3-7-13)   | -178.1 |            |       |
| (2-3-7-17)           | 0.6    | (5-3-7-13)    | -1.2   | (5-3-7-17)   | 177.5  |            |       |
| (3-5-9-11)           | -0.4   | (3-5-9-19)    | 179.6  | (15-5-9-11)  | 179.2  |            |       |
| (15-5-9-19)          | -0.9   | (3-7-13-11)   | 0.3    | (3-7-13-24)  | 179.5  |            |       |
| (17-7-13-11)         | -178.4 | (17-7-13-24)  | 0.8    | (5-9-11-13)  | -0.5   |            |       |
| (5-9-11-22)          | 180.0  | (19-9-11-13)  | 179.6  | (19-9-11-22) | 0.1    |            |       |
| (9-11-13-7)          | 0.5    | (9-11-13-24)  | -178.7 | (22-11-13-7) | 180.0  |            |       |
| (22-11-13-24)        | 0.8    |               |        |              |        |            |       |
| (bond)-(plane) angle |        | (1-2)-(3-2-4) |        | 0.0          |        |            |       |

|                                  |        |        |        |        |        |        |        |        |        |        |
|----------------------------------|--------|--------|--------|--------|--------|--------|--------|--------|--------|--------|
| Frequencies( $\text{cm}^{-1}$ ): | 37.1   | 68.5   | 101.9  | 136.7  | 240.9  | 249.9  | 316.6  | 385.7  |        |        |
|                                  | 425.4  | 434.6  | 438.6  | 477.0  | 559.8  | 597.6  | 639.7  | 640.2  | 660.4  | 720.9  |
|                                  | 725.0  | 761.8  | 794.6  | 802.2  | 877.8  | 886.1  | 956.3  | 968.8  | 975.4  | 1024.2 |
|                                  | 1029.2 | 1039.5 | 1040.2 | 1041.1 | 1042.1 | 1081.9 | 1083.9 | 1137.0 | 1140.7 | 1201.8 |
|                                  | 1208.0 | 1209.4 | 1222.3 | 1239.0 | 1346.5 | 1375.5 | 1382.4 | 1398.4 | 1403.3 | 1507.9 |
|                                  | 1532.8 | 1560.6 | 1572.3 | 1575.5 | 1700.0 | 1706.8 | 1710.3 | 1714.1 | 3276.5 | 3276.7 |
|                                  | 3285.8 | 3286.1 | 3297.9 | 3298.8 | 3305.5 | 3307.3 | 3319.5 | 3319.7 |        |        |

Diphenylhydroxylamine  
 $^1\text{A}$  MPW1K/6-31+G(d,p)  $\text{C}_1$  Geometry

|                                         |                     |
|-----------------------------------------|---------------------|
| Nuclear repulsion energy                | 822.737431 Hartree  |
| UMPW1K/6-31+G(d,p) energy               | -593.674253 Hartree |
| Zero-point correction                   | 0.208269 Hartree    |
| Thermal correction to Enthalpy          | 0.220244 Hartree    |
| Thermal correction to Gibbs Free Energy | 0.169583 Hartree    |

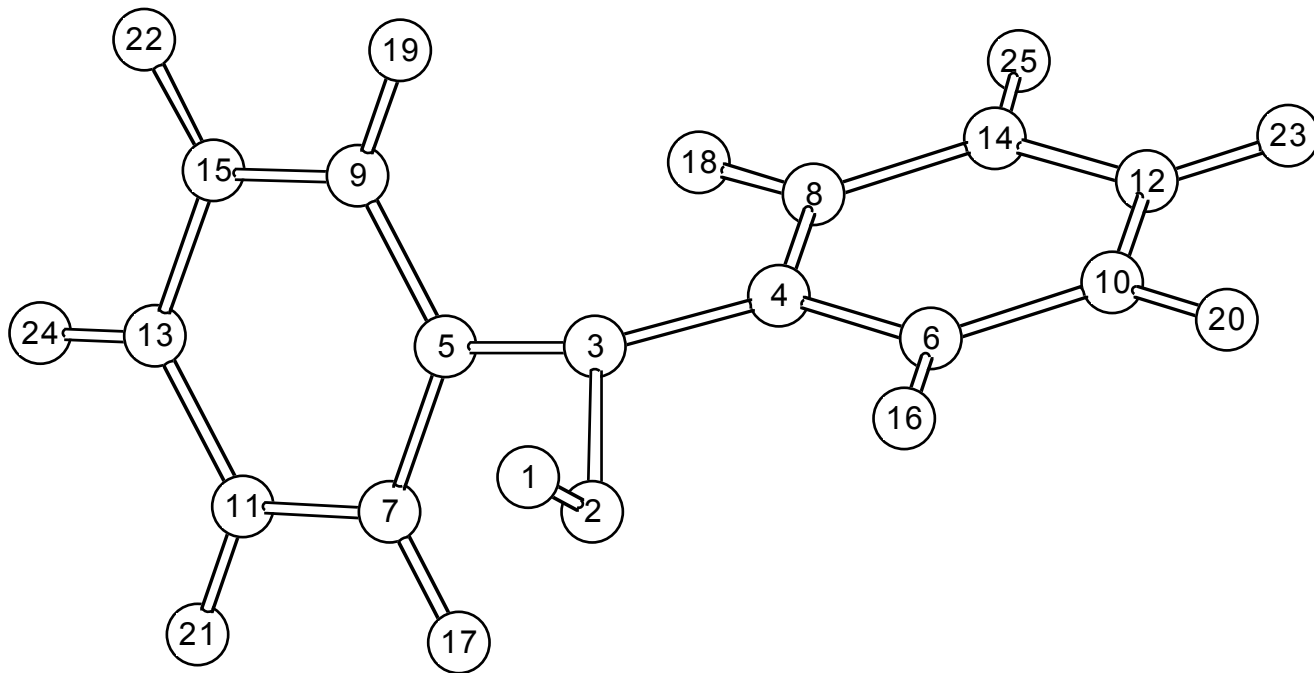

|    | X         | Y        | Z         |     | X         | Y         | Z         |
|----|-----------|----------|-----------|-----|-----------|-----------|-----------|
| H1 | -0.081603 | 2.760105 | -0.953060 | C14 | 2.420687  | -1.760323 | 0.361635  |
| O2 | 0.097643  | 2.275139 | -0.148192 | C15 | -2.968271 | -1.164674 | -0.834932 |
| N3 | 0.046676  | 0.936435 | -0.534540 | H16 | 2.448423  | 2.010996  | -0.372841 |
| C4 | 1.231250  | 0.259469 | -0.188705 | H17 | -1.520701 | 1.488591  | 1.557985  |
| C5 | -1.213872 | 0.360523 | -0.229444 | H18 | 0.302512  | -1.654955 | 0.114723  |

|     |           |           |           |     |           |           |           |
|-----|-----------|-----------|-----------|-----|-----------|-----------|-----------|
| C6  | 2.441597  | 0.951643  | -0.179524 | H19 | -1.181304 | -0.846992 | -1.988889 |
| C7  | -1.931044 | 0.741006  | 0.897879  | H20 | 4.548565  | 0.839233  | 0.103066  |
| C8  | 1.229302  | -1.104862 | 0.095329  | H21 | -3.724794 | 0.468354  | 2.024134  |
| C9  | -1.739864 | -0.581802 | -1.103512 | H22 | -3.370827 | -1.899703 | -1.516106 |
| C10 | 3.621805  | 0.284163  | 0.096751  | H23 | 4.549504  | -1.592546 | 0.576213  |
| C11 | -3.167498 | 0.168369  | 1.148915  | H24 | -4.649798 | -1.234789 | 0.492472  |
| C12 | 3.625551  | -1.076740 | 0.363681  | H25 | 2.397469  | -2.817977 | 0.580139  |
| C13 | -3.687197 | -0.789518 | 0.290173  |     |           |           |           |

|                      |        |               |        |               |       |            |       |         |       |
|----------------------|--------|---------------|--------|---------------|-------|------------|-------|---------|-------|
| (1-2)                | 0.957  | (2-3)         | 1.394  | (3-4)         | 1.408 | (3-5)      | 1.419 | (4-6)   | 1.394 |
| (4-8)                | 1.394  | (5-7)         | 1.389  | (5-9)         | 1.389 | (6-10)     | 1.384 | (6-16)  | 1.077 |
| (7-11)               | 1.386  | (7-17)        | 1.078  | (8-14)        | 1.386 | (8-18)     | 1.078 | (9-15)  | 1.386 |
| (9-19)               | 1.080  | (10-12)       | 1.387  | (10-20)       | 1.080 | (11-13)    | 1.387 | (11-21) | 1.080 |
| (12-14)              | 1.385  | (12-23)       | 1.079  | (13-15)       | 1.387 | (13-24)    | 1.080 | (14-25) | 1.080 |
| (15-22)              | 1.080  |               |        |               |       |            |       |         |       |
| (1-2-3)              | 104.3  | (2-3-4)       | 111.3  | (2-3-5)       | 111.3 | (4-3-5)    | 120.0 |         |       |
| (3-4-6)              | 119.6  | (3-4-8)       | 121.3  | (6-4-8)       | 119.1 | (3-5-7)    | 121.5 |         |       |
| (3-5-9)              | 118.5  | (7-5-9)       | 120.1  | (4-6-10)      | 120.1 | (4-6-16)   | 119.5 |         |       |
| (10-6-16)            | 120.3  | (5-7-11)      | 119.6  | (5-7-17)      | 119.3 | (11-7-17)  | 121.0 |         |       |
| (4-8-14)             | 120.1  | (4-8-18)      | 120.3  | (14-8-18)     | 119.6 | (5-9-15)   | 119.9 |         |       |
| (5-9-19)             | 119.1  | (15-9-19)     | 120.9  | (6-10-12)     | 120.9 | (6-10-20)  | 119.0 |         |       |
| (12-10-20)           | 120.1  | (7-11-13)     | 120.5  | (7-11-21)     | 119.5 | (13-11-21) | 120.0 |         |       |
| (10-12-14)           | 118.8  | (10-12-23)    | 120.6  | (14-12-23)    | 120.6 | (11-13-15) | 119.6 |         |       |
| (11-13-24)           | 120.2  | (15-13-24)    | 120.2  | (8-14-12)     | 121.0 | (8-14-25)  | 118.9 |         |       |
| (12-14-25)           | 120.1  | (9-15-13)     | 120.2  | (9-15-22)     | 119.6 | (13-15-22) | 120.2 |         |       |
| (1-2-3-4)            | 125.1  | (1-2-3-5)     | -98.3  | (2-3-4-6)     | -31.7 |            |       |         |       |
| (2-3-4-8)            | 150.8  | (5-3-4-6)     | -164.1 | (5-3-4-8)     | 18.4  |            |       |         |       |
| (2-3-5-7)            | -34.1  | (2-3-5-9)     | 144.5  | (4-3-5-7)     | 98.3  |            |       |         |       |
| (4-3-5-9)            | -83.1  | (3-4-6-10)    | -176.9 | (3-4-6-16)    | 4.1   |            |       |         |       |
| (8-4-6-10)           | 0.6    | (8-4-6-16)    | -178.4 | (3-4-8-14)    | 176.5 |            |       |         |       |
| (3-4-8-18)           | -3.9   | (6-4-8-14)    | -1.0   | (6-4-8-18)    | 178.7 |            |       |         |       |
| (3-5-7-11)           | 179.0  | (3-5-7-17)    | -0.2   | (9-5-7-11)    | 0.5   |            |       |         |       |
| (9-5-7-17)           | -178.7 | (3-5-9-15)    | 179.9  | (3-5-9-19)    | -0.2  |            |       |         |       |
| (7-5-9-15)           | -1.4   | (7-5-9-19)    | 178.4  | (4-6-10-12)   | 0.2   |            |       |         |       |
| (4-6-10-20)          | -179.7 | (16-6-10-12)  | 179.2  | (16-6-10-20)  | -0.8  |            |       |         |       |
| (5-7-11-13)          | 0.6    | (5-7-11-21)   | -179.8 | (17-7-11-13)  | 179.8 |            |       |         |       |
| (17-7-11-21)         | -0.6   | (4-8-14-12)   | 0.6    | (4-8-14-25)   | 180.0 |            |       |         |       |
| (18-8-14-12)         | -179.0 | (18-8-14-25)  | 0.3    | (5-9-15-13)   | 1.3   |            |       |         |       |
| (5-9-15-22)          | -179.8 | (19-9-15-13)  | -178.5 | (19-9-15-22)  | 0.4   |            |       |         |       |
| (6-10-12-14)         | -0.6   | (6-10-12-23)  | 179.9  | (20-10-12-14) | 179.4 |            |       |         |       |
| (20-10-12-23)        | -0.2   | (7-11-13-15)  | -0.7   | (7-11-13-24)  | 179.8 |            |       |         |       |
| (21-11-13-15)        | 179.7  | (21-11-13-24) | 0.2    | (10-12-14-8)  | 0.2   |            |       |         |       |
| (10-12-14-25)        | -179.2 | (23-12-14-8)  | 179.7  | (23-12-14-25) | 0.4   |            |       |         |       |
| (11-13-15-9)         | -0.3   | (11-13-15-22) | -179.2 | (24-13-15-9)  | 179.2 |            |       |         |       |
| (24-13-15-22)        | 0.3    |               |        |               |       |            |       |         |       |
| (bond)-(plane) angle |        | (2-3)-(4-3-5) |        | 43.5          |       |            |       |         |       |

|                                  |        |        |        |        |        |        |        |        |        |
|----------------------------------|--------|--------|--------|--------|--------|--------|--------|--------|--------|
| Frequencies( $\text{cm}^{-1}$ ): | 18.5   | 45.7   | 84.6   | 149.8  | 233.2  | 245.1  | 315.7  | 371.6  |        |
|                                  | 381.8  | 428.3  | 431.7  | 466.8  | 479.6  | 559.4  | 591.9  | 638.4  | 642.2  |
|                                  | 725.4  | 734.2  | 756.2  | 792.2  | 811.9  | 869.6  | 887.9  | 939.8  | 946.0  |
|                                  | 1017.3 | 1028.2 | 1033.4 | 1035.4 | 1043.1 | 1043.5 | 1080.7 | 1089.5 | 1106.3 |
|                                  | 1151.9 | 1207.6 | 1207.7 | 1221.2 | 1235.4 | 1285.7 | 1352.3 | 1378.4 | 1386.3 |
|                                  | 1401.7 | 1433.3 | 1531.9 | 1537.8 | 1578.4 | 1582.4 | 1703.1 | 1707.4 | 1718.0 |
|                                  | 3271.2 | 3272.3 | 3279.1 | 3280.8 | 3291.1 | 3297.5 | 3299.7 | 3309.3 | 3311.7 |
|                                  |        |        |        |        |        |        |        |        | 3323.1 |



Diphenylhydroxylamine + Diphenylnitroxyl Radical Transition Structure  
 $^2A$  UMPW1K/6-31+G(d,p)  $C_1$  Geometry

|                                                              |                      |
|--------------------------------------------------------------|----------------------|
| Nuclear repulsion energy                                     | 2482.179704 Hartree  |
| UMPW1K/6-31+G(d,p) energy ( $\langle S^2 \rangle = 0.7888$ ) | -1186.745154 Hartree |
| Zero-point correction                                        | 0.405488 Hartree     |
| Thermal correction to Enthalpy                               | 0.429997 Hartree     |
| Thermal correction to Gibbs Free Energy                      | 0.344302 Hartree     |

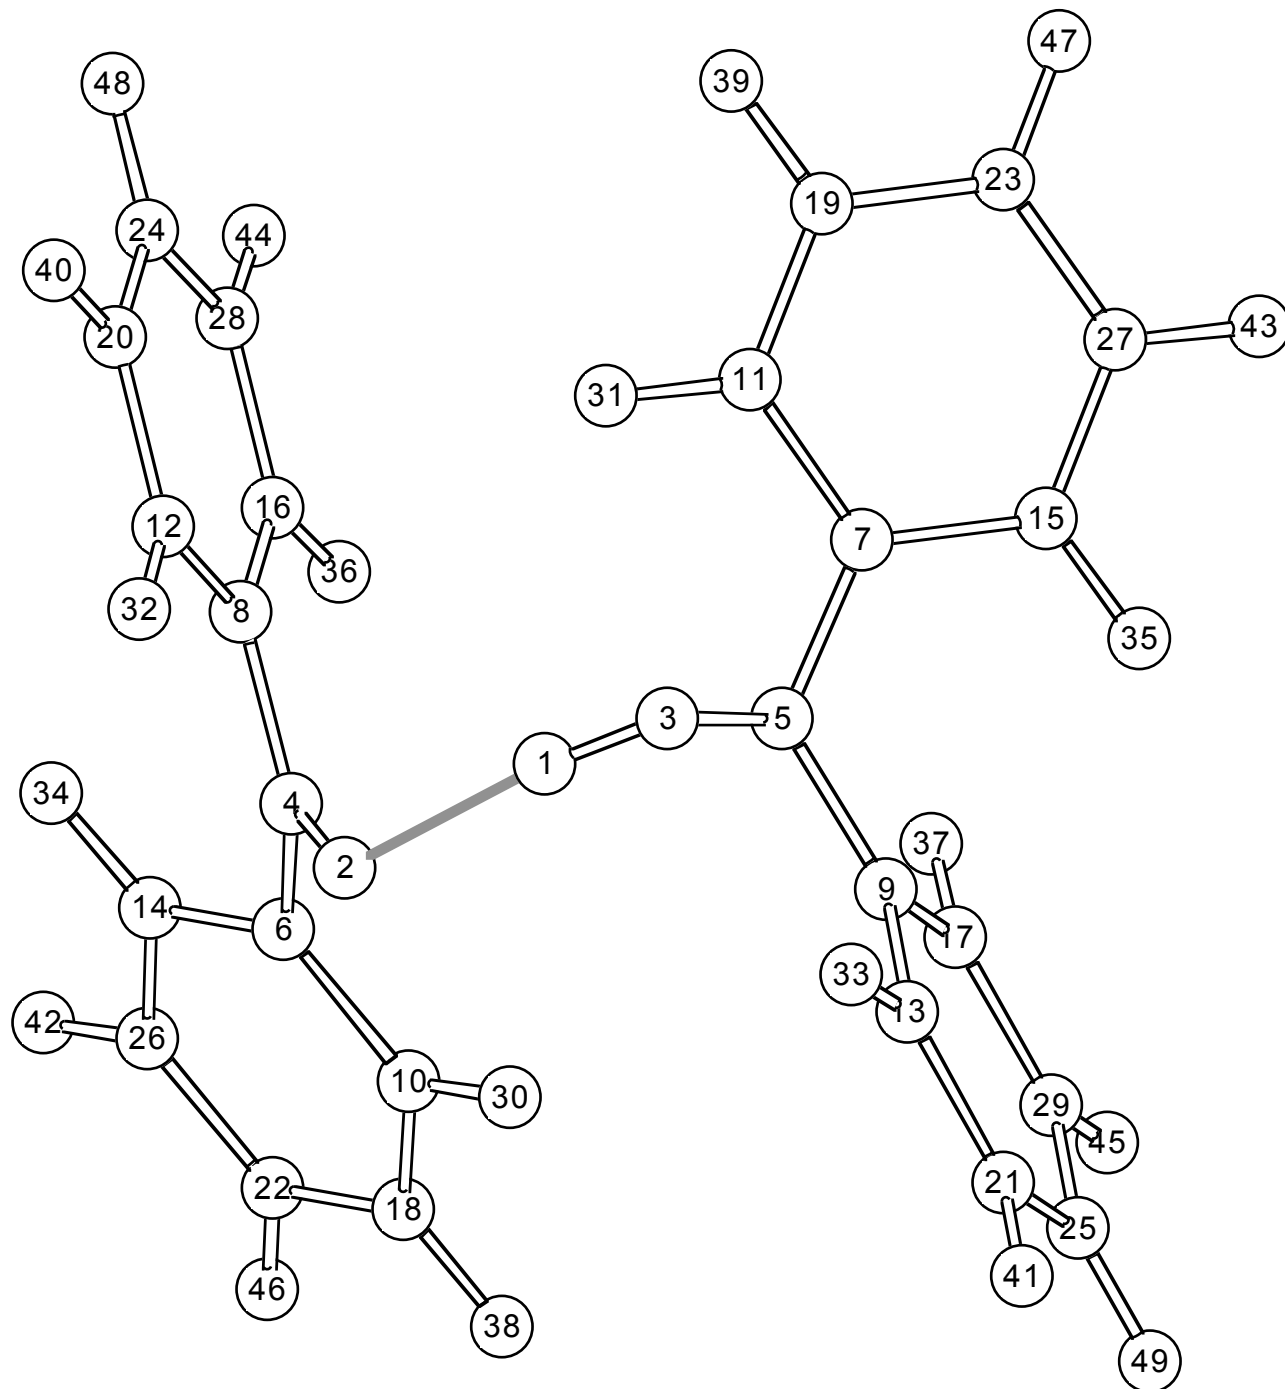

|    | X         | Y         | Z        |     | X         | Y         | Z         |
|----|-----------|-----------|----------|-----|-----------|-----------|-----------|
| H1 | 0.389498  | 0.228301  | 1.911034 | C26 | -3.879594 | -2.697277 | -1.373385 |
| O2 | -1.193562 | -0.632825 | 1.807809 | C27 | 3.464567  | 2.624335  | -1.726748 |
| O3 | 1.288535  | 0.587314  | 1.849200 | C28 | -2.941179 | 2.666899  | -0.955219 |
| N4 | -1.940859 | -0.426087 | 0.804403 | C29 | 3.082935  | -2.772054 | -0.922461 |
| N5 | 1.689962  | 0.301780  | 0.555804 | H30 | -0.487639 | -2.555013 | 0.457013  |
| C6 | -2.309978 | -1.533209 | 0.012623 | H31 | 0.512304  | 2.627114  | 0.732623  |

|     |           |           |           |     |           |           |           |
|-----|-----------|-----------|-----------|-----|-----------|-----------|-----------|
| C7  | 2.072655  | 1.454491  | -0.145651 | H32 | -2.368267 | 1.372179  | 2.630499  |
| C8  | -2.370465 | 0.894078  | 0.550532  | H33 | 2.848063  | -1.062277 | 2.519342  |
| C9  | 2.376273  | -0.918175 | 0.443392  | H34 | -4.234021 | -0.754563 | -0.543777 |
| C10 | -1.430813 | -2.608626 | -0.062012 | H35 | 3.761174  | 0.588922  | -1.154334 |
| C11 | 1.333425  | 2.624553  | 0.034929  | H36 | -2.388094 | 0.695941  | -1.587649 |
| C12 | -2.538749 | 1.748877  | 1.634750  | H37 | 1.982782  | -1.086181 | -1.656303 |
| C13 | 2.925442  | -1.543331 | 1.558419  | H38 | -1.096307 | -4.550549 | -0.871753 |
| C14 | -3.541431 | -1.576530 | -0.634625 | H39 | 1.076489  | 4.666174  | -0.507831 |
| C15 | 3.153813  | 1.469998  | -1.024913 | H40 | -3.057118 | 3.722339  | 2.254813  |
| C16 | -2.561507 | 1.351982  | -0.749261 | H41 | 3.974035  | -3.247355 | 2.297203  |
| C17 | 2.442801  | -1.551867 | -0.797642 | H42 | -4.838184 | -2.735912 | -1.868593 |
| C18 | -1.782875 | -3.720082 | -0.805517 | H43 | 4.308666  | 2.614994  | -2.401077 |
| C19 | 1.661459  | 3.771301  | -0.663913 | H44 | -3.076254 | 3.026933  | -1.963922 |
| C20 | -2.919185 | 3.060184  | 1.413302  | H45 | 3.130174  | -3.248044 | -1.891202 |
| C21 | 3.550520  | -2.773533 | 1.423564  | H46 | -3.272671 | -4.640065 | -2.043873 |
| C22 | -3.003389 | -3.769248 | -1.465469 | H47 | 2.974253  | 4.679490  | -2.102797 |
| C23 | 2.723823  | 3.782272  | -1.557265 | H48 | -3.421389 | 4.547698  | -0.047077 |
| C24 | -3.125854 | 3.523118  | 0.120959  | H49 | 4.132923  | -4.348943 | 0.088291  |
| C25 | 3.641651  | -3.392647 | 0.186921  |     |           |           |           |

|            |       |            |       |            |       |            |       |         |       |
|------------|-------|------------|-------|------------|-------|------------|-------|---------|-------|
| (1-2)      | 1.805 | (1-3)      | 0.970 | (2-4)      | 1.268 | (3-5)      | 1.384 | (4-6)   | 1.410 |
| (4-8)      | 1.411 | (5-7)      | 1.403 | (5-9)      | 1.404 | (6-10)     | 1.391 | (6-14)  | 1.392 |
| (7-11)     | 1.396 | (7-15)     | 1.394 | (8-12)     | 1.391 | (8-16)     | 1.391 | (9-13)  | 1.391 |
| (9-17)     | 1.395 | (10-18)    | 1.383 | (10-30)    | 1.078 | (11-19)    | 1.382 | (11-31) | 1.078 |
| (12-20)    | 1.383 | (12-32)    | 1.078 | (13-21)    | 1.386 | (13-33)    | 1.077 | (14-26) | 1.384 |
| (14-34)    | 1.079 | (15-27)    | 1.386 | (15-35)    | 1.078 | (16-28)    | 1.384 | (16-36) | 1.079 |
| (17-29)    | 1.384 | (17-37)    | 1.080 | (18-22)    | 1.388 | (18-38)    | 1.080 | (19-23) | 1.388 |
| (19-39)    | 1.080 | (20-24)    | 1.388 | (20-40)    | 1.080 | (21-25)    | 1.386 | (21-41) | 1.080 |
| (22-26)    | 1.388 | (22-46)    | 1.080 | (23-27)    | 1.385 | (23-47)    | 1.080 | (24-28) | 1.388 |
| (24-48)    | 1.080 | (25-29)    | 1.389 | (25-49)    | 1.080 | (26-42)    | 1.080 | (27-43) | 1.080 |
| (28-44)    | 1.080 | (29-45)    | 1.080 |            |       |            |       |         |       |
| (2-1-3)    | 170.3 | (1-2-4)    | 119.0 | (1-3-5)    | 104.6 | (2-4-6)    | 118.1 |         |       |
| (2-4-8)    | 118.3 | (6-4-8)    | 123.6 | (3-5-7)    | 112.1 | (3-5-9)    | 113.3 |         |       |
| (7-5-9)    | 122.7 | (4-6-10)   | 118.1 | (4-6-14)   | 121.1 | (10-6-14)  | 120.7 |         |       |
| (5-7-11)   | 118.7 | (5-7-15)   | 122.4 | (11-7-15)  | 118.9 | (4-8-12)   | 118.1 |         |       |
| (4-8-16)   | 121.2 | (12-8-16)  | 120.6 | (5-9-13)   | 121.3 | (5-9-17)   | 119.3 |         |       |
| (13-9-17)  | 119.3 | (6-10-18)  | 119.3 | (6-10-30)  | 119.3 | (18-10-30) | 121.4 |         |       |
| (7-11-19)  | 120.3 | (7-11-31)  | 119.3 | (19-11-31) | 120.4 | (8-12-20)  | 119.4 |         |       |
| (8-12-32)  | 119.1 | (20-12-32) | 121.5 | (9-13-21)  | 119.9 | (9-13-33)  | 119.1 |         |       |
| (21-13-33) | 121.0 | (6-14-26)  | 119.3 | (6-14-34)  | 120.3 | (26-14-34) | 120.3 |         |       |
| (7-15-27)  | 120.2 | (7-15-35)  | 120.2 | (27-15-35) | 119.6 | (8-16-28)  | 119.3 |         |       |
| (8-16-36)  | 120.3 | (28-16-36) | 120.4 | (9-17-29)  | 120.2 | (9-17-37)  | 119.4 |         |       |
| (29-17-37) | 120.4 | (10-18-22) | 120.5 | (10-18-38) | 119.3 | (22-18-38) | 120.2 |         |       |
| (11-19-23) | 120.9 | (11-19-39) | 119.0 | (23-19-39) | 120.1 | (12-20-24) | 120.4 |         |       |
| (12-20-40) | 119.5 | (24-20-40) | 120.1 | (13-21-25) | 120.8 | (13-21-41) | 119.2 |         |       |
| (25-21-41) | 120.0 | (18-22-26) | 119.7 | (18-22-46) | 120.2 | (26-22-46) | 120.1 |         |       |
| (19-23-27) | 118.8 | (19-23-47) | 120.6 | (27-23-47) | 120.6 | (20-24-28) | 119.8 |         |       |
| (20-24-48) | 120.1 | (28-24-48) | 120.1 | (21-25-29) | 119.1 | (21-25-49) | 120.5 |         |       |
| (29-25-49) | 120.4 | (14-26-22) | 120.4 | (14-26-42) | 119.4 | (22-26-42) | 120.2 |         |       |
| (15-27-23) | 121.0 | (15-27-43) | 118.9 | (23-27-43) | 120.1 | (16-28-24) | 120.5 |         |       |
| (16-28-44) | 119.4 | (24-28-44) | 120.1 | (17-29-25) | 120.5 | (17-29-45) | 119.3 |         |       |
| (25-29-45) | 120.1 |            |       |            |       |            |       |         |       |
| (3-1-2-4)  | -73.4 | (2-1-3-5)  | 26.4  | (1-2-4-6)  | 121.9 |            |       |         |       |
| (1-2-4-8)  | -58.8 | (1-3-5-7)  | 123.4 | (1-3-5-9)  | -92.4 |            |       |         |       |
| (2-4-6-10) | -29.4 | (2-4-6-14) | 148.1 | (8-4-6-10) | 151.4 |            |       |         |       |
| (8-4-6-14) | -31.1 | (2-4-8-12) | -30.5 | (2-4-8-16) | 146.5 |            |       |         |       |

|                      |        |               |        |               |        |
|----------------------|--------|---------------|--------|---------------|--------|
| (6-4-8-12)           | 148.7  | (6-4-8-16)    | -34.3  | (3-5-7-11)    | -39.4  |
| (3-5-7-15)           | 141.3  | (9-5-7-11)    | -179.7 | (9-5-7-15)    | 1.0    |
| (3-5-9-13)           | -17.8  | (3-5-9-17)    | 158.5  | (7-5-9-13)    | 122.1  |
| (7-5-9-17)           | -61.6  | (4-6-10-18)   | 178.5  | (4-6-10-30)   | -1.9   |
| (14-6-10-18)         | 1.0    | (14-6-10-30)  | -179.3 | (4-6-14-26)   | -178.3 |
| (4-6-14-34)          | 0.4    | (10-6-14-26)  | -0.9   | (10-6-14-34)  | 177.8  |
| (5-7-11-19)          | -178.4 | (5-7-11-31)   | 2.2    | (15-7-11-19)  | 0.9    |
| (15-7-11-31)         | -178.4 | (5-7-15-27)   | 177.9  | (5-7-15-35)   | -2.9   |
| (11-7-15-27)         | -1.4   | (11-7-15-35)  | 177.8  | (4-8-12-20)   | 178.0  |
| (4-8-12-32)          | -1.9   | (16-8-12-20)  | 1.0    | (16-8-12-32)  | -179.0 |
| (4-8-16-28)          | -177.9 | (4-8-16-36)   | 0.4    | (12-8-16-28)  | -0.9   |
| (12-8-16-36)         | 177.4  | (5-9-13-21)   | 177.4  | (5-9-13-33)   | -2.0   |
| (17-9-13-21)         | 1.1    | (17-9-13-33)  | -178.4 | (5-9-17-29)   | -178.2 |
| (5-9-17-37)          | 1.2    | (13-9-17-29)  | -1.8   | (13-9-17-37)  | 177.6  |
| (6-10-18-22)         | -0.4   | (6-10-18-38)  | 179.4  | (30-10-18-22) | 179.9  |
| (30-10-18-38)        | -0.3   | (7-11-19-23)  | 0.2    | (7-11-19-39)  | -179.9 |
| (31-11-19-23)        | 179.5  | (31-11-19-39) | -0.6   | (8-12-20-24)  | -0.3   |
| (8-12-20-40)         | 179.5  | (32-12-20-24) | 179.7  | (32-12-20-40) | -0.5   |
| (9-13-21-25)         | 0.2    | (9-13-21-41)  | 179.9  | (33-13-21-25) | 179.6  |
| (33-13-21-41)        | -0.7   | (6-14-26-22)  | 0.2    | (6-14-26-42)  | 179.5  |
| (34-14-26-22)        | -178.5 | (34-14-26-42) | 0.8    | (7-15-27-23)  | 0.8    |
| (7-15-27-43)         | 179.8  | (35-15-27-23) | -178.4 | (35-15-27-43) | 0.6    |
| (8-16-28-24)         | 0.2    | (8-16-28-44)  | 179.2  | (36-16-28-24) | -178.1 |
| (36-16-28-44)        | 0.9    | (9-17-29-25)  | 1.3    | (9-17-29-45)  | -179.7 |
| (37-17-29-25)        | -178.1 | (37-17-29-45) | 0.9    | (10-18-22-26) | -0.3   |
| (10-18-22-46)        | 180.0  | (38-18-22-26) | 179.9  | (38-18-22-46) | 0.3    |
| (11-19-23-27)        | -0.8   | (11-19-23-47) | 179.8  | (39-19-23-27) | 179.3  |
| (39-19-23-47)        | -0.1   | (12-20-24-28) | -0.4   | (12-20-24-48) | -179.9 |
| (40-20-24-28)        | 179.7  | (40-20-24-48) | 0.2    | (13-21-25-29) | -0.8   |
| (13-21-25-49)        | 179.8  | (41-21-25-29) | 179.6  | (41-21-25-49) | 0.1    |
| (18-22-26-14)        | 0.4    | (18-22-26-42) | -178.9 | (46-22-26-14) | -179.9 |
| (46-22-26-42)        | 0.8    | (19-23-27-15) | 0.3    | (19-23-27-43) | -178.7 |
| (47-23-27-15)        | 179.7  | (47-23-27-43) | 0.7    | (20-24-28-16) | 0.5    |
| (20-24-28-44)        | -178.5 | (48-24-28-16) | 180.0  | (48-24-28-44) | 1.0    |
| (21-25-29-17)        | 0.0    | (21-25-29-45) | -179.0 | (49-25-29-17) | 179.5  |
| (49-25-29-45)        | 0.5    |               |        |               |        |
| (bond)-(plane) angle |        | (2-4)-(6-4-8) | 0.7    |               |        |
| (bond)-(plane) angle |        | (3-5)-(7-5-9) | 36.3   |               |        |

|                                  |        |        |        |        |        |        |        |        |        |        |
|----------------------------------|--------|--------|--------|--------|--------|--------|--------|--------|--------|--------|
| Frequencies( $\text{cm}^{-1}$ ): | 6.2    | 11.7   | 12.9   | 22.5   | 25.3   | 33.9   | 45.6   | 64.3   |        |        |
|                                  | 69.5   | 90.0   | 101.8  | 102.8  | 165.1  | 205.9  | 240.0  | 245.3  | 249.1  | 251.3  |
|                                  | 316.3  | 317.6  | 372.4  | 392.3  | 424.3  | 427.1  | 432.2  | 433.7  | 438.9  | 441.5  |
|                                  | 474.7  | 484.1  | 544.7  | 563.8  | 589.1  | 598.7  | 638.7  | 639.0  | 640.3  | 641.1  |
|                                  | 643.8  | 659.4  | 716.2  | 719.5  | 722.3  | 730.3  | 734.2  | 756.3  | 762.2  | 790.8  |
|                                  | 795.6  | 803.0  | 803.2  | 869.4  | 877.7  | 883.8  | 887.6  | 939.2  | 953.2  | 958.9  |
|                                  | 963.5  | 970.8  | 977.3  | 1016.6 | 1025.5 | 1026.0 | 1029.5 | 1030.9 | 1035.7 | 1037.4 |
|                                  | 1038.8 | 1039.3 | 1040.2 | 1043.4 | 1043.9 | 1080.9 | 1082.9 | 1083.2 | 1088.7 | 1121.4 |
|                                  | 1136.8 | 1138.5 | 1142.1 | 1157.3 | 1199.9 | 1205.4 | 1206.2 | 1208.8 | 1209.7 | 1222.7 |
|                                  | 1224.1 | 1234.4 | 1238.7 | 1308.3 | 1345.6 | 1355.4 | 1376.2 | 1383.1 | 1387.6 | 1393.6 |
|                                  | 1396.6 | 1399.1 | 1403.3 | 1409.1 | 1503.0 | 1528.3 | 1533.0 | 1540.0 | 1542.7 | 1560.2 |
|                                  | 1569.6 | 1570.9 | 1579.1 | 1582.7 | 1697.5 | 1698.9 | 1703.8 | 1705.1 | 1709.1 | 1709.6 |
|                                  | 1715.9 | 1727.8 | 3268.2 | 3268.7 | 3276.4 | 3277.1 | 3278.5 | 3279.4 | 3288.8 | 3289.3 |
|                                  | 3290.1 | 3294.8 | 3298.0 | 3299.2 | 3300.2 | 3306.5 | 3308.0 | 3309.0 | 3316.5 | 3316.8 |
|                                  | 3321.0 | 3322.2 | 3684.5 |        |        |        |        |        |        |        |

Diphenylhydroxylamine + Diphenylnitroxyl Radical Transition Structure  
<sup>2</sup>B UMPW1K/6-31+G(d,p) C<sub>2</sub> Geometry

|                                                                       |                      |
|-----------------------------------------------------------------------|----------------------|
| Nuclear repulsion energy                                              | 2441.883207 Hartree  |
| UMPW1K/6-31+G(d,p) energy (<math>\langle s^2 \rangle = 0.7814</math>) | -1186.721926 Hartree |
| Zero-point correction                                                 | 0.400245 Hartree     |
| Thermal correction to Enthalpy                                        | 0.423917 Hartree     |
| Thermal correction to Gibbs Free Energy                               | 0.342677 Hartree     |

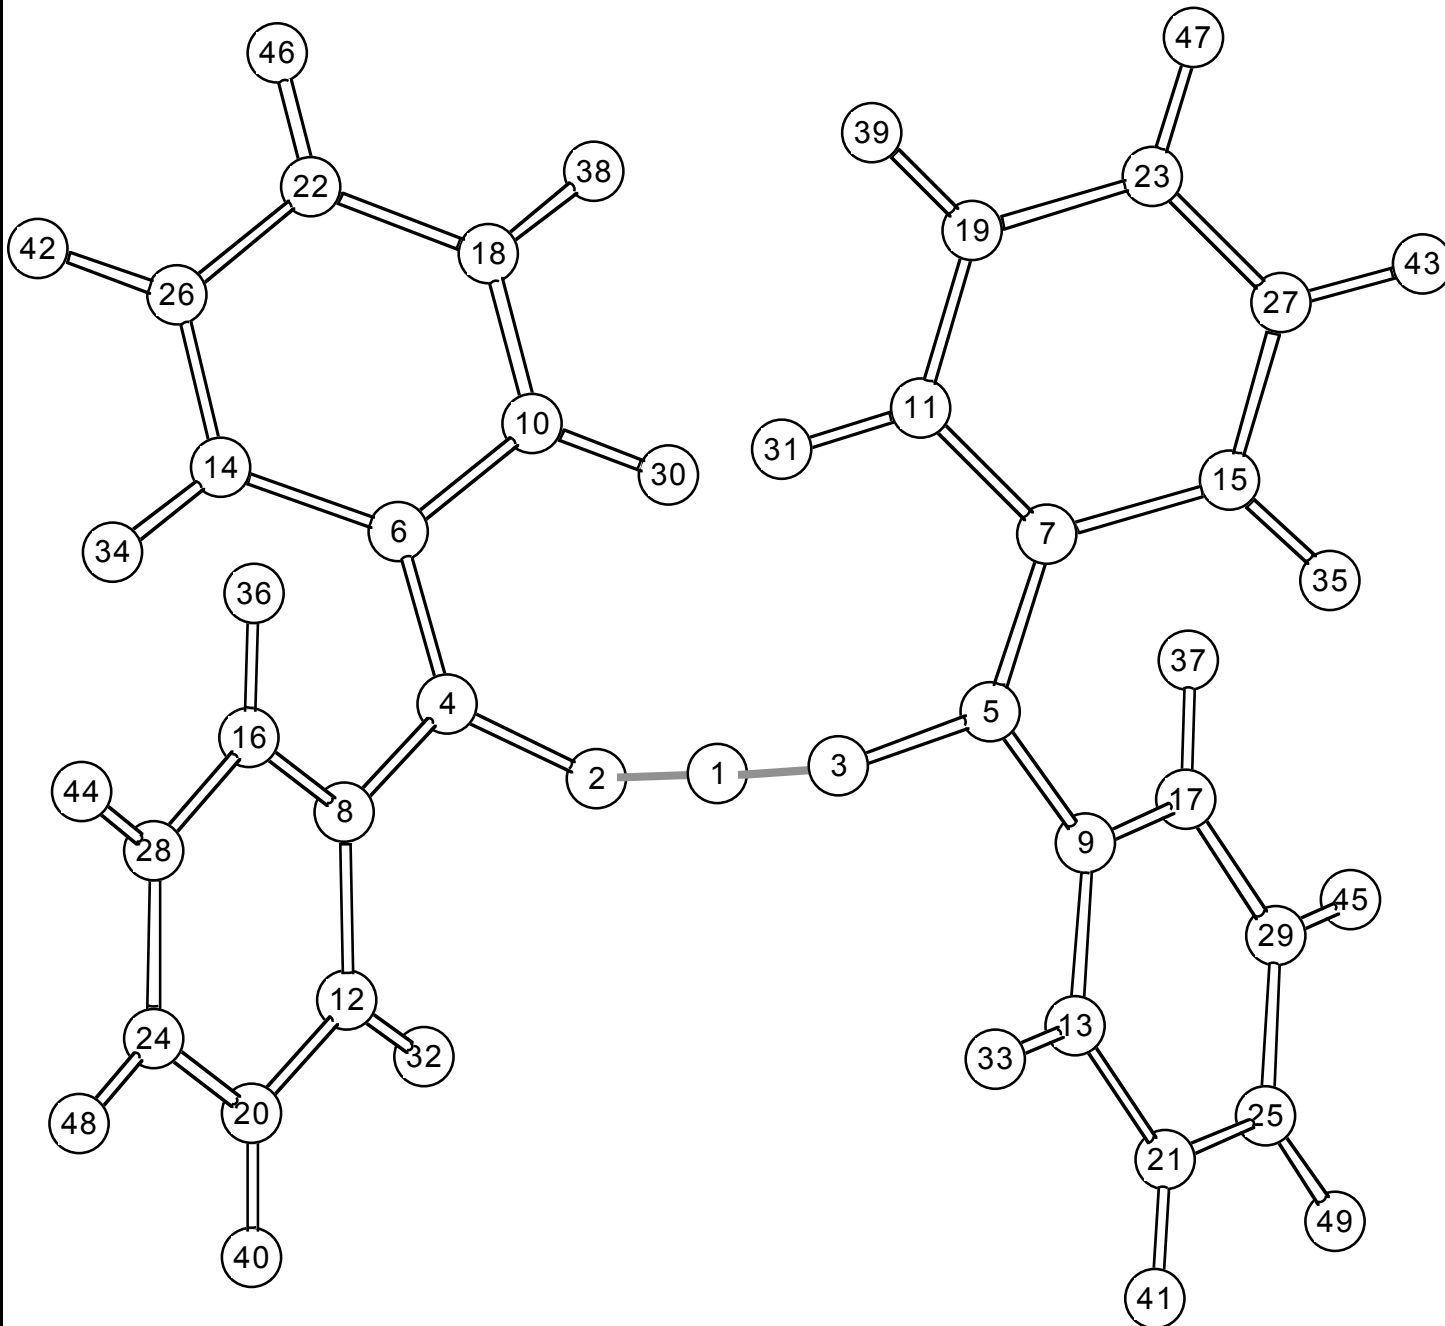

|    | X         | Y         | Z         |     | X         | Y         | Z         |
|----|-----------|-----------|-----------|-----|-----------|-----------|-----------|
| H1 | 0.000000  | 0.000000  | 0.777960  | C26 | -0.335792 | 4.117030  | -2.712853 |
| O2 | -0.665990 | 0.976864  | 0.765120  | C27 | 0.335792  | -4.117030 | -2.712853 |
| O3 | 0.665990  | -0.976864 | 0.765120  | C28 | 2.956922  | 3.766112  | 1.651653  |
| N4 | 0.005333  | 2.009440  | 0.293732  | C29 | -2.956922 | -3.766112 | 1.651653  |
| N5 | -0.005333 | -2.009440 | 0.293732  | H30 | -1.214359 | 0.569954  | -1.509883 |
| C6 | -0.293644 | 2.431969  | -0.993259 | H31 | 1.214359  | -0.569954 | -1.509883 |
| C7 | 0.293644  | -2.431969 | -0.993259 | H32 | -0.321383 | 2.151520  | 2.867809  |
| C8 | 0.893244  | 2.628824  | 1.179473  | H33 | 0.321383  | -2.151520 | 2.867809  |

|     |           |           |           |     |           |           |           |
|-----|-----------|-----------|-----------|-----|-----------|-----------|-----------|
| C9  | -0.893244 | -2.628824 | 1.179473  | H34 | 0.446275  | 4.441567  | -0.755179 |
| C10 | -0.951962 | 1.553706  | -1.858652 | H35 | -0.446275 | -4.441567 | -0.755179 |
| C11 | 0.951962  | -1.553706 | -1.858652 | H36 | 2.351558  | 3.155214  | -0.307572 |
| C12 | 0.595020  | 2.615543  | 2.541256  | H37 | -2.351558 | -3.155214 | -0.307572 |
| C13 | -0.595020 | -2.615543 | 2.541256  | H38 | -1.775578 | 1.264599  | -3.798887 |
| C14 | -0.005333 | 3.731022  | -1.427888 | H39 | 1.775578  | -1.264599 | -3.798887 |
| C15 | 0.005333  | -3.731022 | -1.427888 | H40 | 1.229785  | 3.182392  | 4.494538  |
| C16 | 2.090186  | 3.192132  | 0.738247  | H41 | -1.229785 | -3.182392 | 4.494538  |
| C17 | -2.090186 | -3.192132 | 0.738247  | H42 | -0.113263 | 5.125069  | -3.030451 |
| C18 | -1.273720 | 1.958749  | -3.141054 | H43 | 0.113263  | -5.125069 | -3.030451 |
| C19 | 1.273720  | -1.958749 | -3.141054 | H44 | 3.885149  | 4.193291  | 1.302174  |
| C20 | 1.472561  | 3.189287  | 3.442275  | H45 | -3.885149 | -4.193291 | 1.302174  |
| C21 | -1.472561 | -3.189287 | 3.442275  | H46 | -1.217156 | 3.545816  | -4.585807 |
| C22 | -0.962696 | 3.235821  | -3.583808 | H47 | 1.217156  | -3.545816 | -4.585807 |
| C23 | 0.962696  | -3.235821 | -3.583808 | H48 | 3.335027  | 4.220482  | 3.713120  |
| C24 | 2.653414  | 3.773744  | 3.005287  | H49 | -3.335027 | -4.220482 | 3.713120  |
| C25 | -2.653414 | -3.773744 | 3.005287  |     |           |           |           |

|                      |        |               |        |               |        |            |       |         |       |
|----------------------|--------|---------------|--------|---------------|--------|------------|-------|---------|-------|
| (1-2)                | 1.182  | (2-4)         | 1.319  | (4-6)         | 1.387  | (4-8)      | 1.399 | (6-10)  | 1.398 |
| (6-14)               | 1.400  | (8-12)        | 1.394  | (8-16)        | 1.395  | (10-18)    | 1.383 | (10-30) | 1.076 |
| (12-20)              | 1.382  | (12-32)       | 1.078  | (14-26)       | 1.382  | (14-34)    | 1.078 | (16-28) | 1.384 |
| (16-36)              | 1.079  | (18-22)       | 1.387  | (18-38)       | 1.080  | (20-24)    | 1.388 | (20-40) | 1.080 |
| (22-26)              | 1.389  | (22-46)       | 1.079  | (24-28)       | 1.387  | (24-48)    | 1.079 | (26-42) | 1.080 |
| (28-44)              | 1.080  |               |        |               |        |            |       |         |       |
| (2-1-3)              | 178.8  | (1-2-4)       | 111.3  | (2-4-6)       | 117.4  | (2-4-8)    | 116.3 |         |       |
| (6-4-8)              | 126.1  | (4-6-10)      | 119.0  | (4-6-14)      | 121.8  | (10-6-14)  | 119.2 |         |       |
| (4-8-12)             | 118.6  | (4-8-16)      | 121.6  | (12-8-16)     | 119.8  | (6-10-18)  | 120.0 |         |       |
| (6-10-30)            | 119.2  | (18-10-30)    | 120.8  | (8-12-20)     | 119.8  | (8-12-32)  | 118.8 |         |       |
| (20-12-32)           | 121.4  | (6-14-26)     | 119.9  | (6-14-34)     | 120.3  | (26-14-34) | 119.8 |         |       |
| (8-16-28)            | 119.8  | (8-16-36)     | 120.1  | (28-16-36)    | 120.2  | (10-18-22) | 120.9 |         |       |
| (10-18-38)           | 119.0  | (22-18-38)    | 120.1  | (12-20-24)    | 120.6  | (12-20-40) | 119.3 |         |       |
| (24-20-40)           | 120.0  | (18-22-26)    | 119.0  | (18-22-46)    | 120.5  | (26-22-46) | 120.4 |         |       |
| (20-24-28)           | 119.4  | (20-24-48)    | 120.3  | (28-24-48)    | 120.3  | (14-26-22) | 120.9 |         |       |
| (14-26-42)           | 119.0  | (22-26-42)    | 120.1  | (16-28-24)    | 120.6  | (16-28-44) | 119.3 |         |       |
| (24-28-44)           | 120.1  |               |        |               |        |            |       |         |       |
| (3-1-2-4)            | -67.7  | (1-2-4-6)     | 105.1  | (1-2-4-8)     | -78.9  |            |       |         |       |
| (2-4-6-10)           | -19.2  | (2-4-6-14)    | 158.1  | (8-4-6-10)    | 165.3  |            |       |         |       |
| (8-4-6-14)           | -17.4  | (2-4-8-12)    | -30.5  | (2-4-8-16)    | 146.1  |            |       |         |       |
| (6-4-8-12)           | 145.0  | (6-4-8-16)    | -38.3  | (4-6-10-18)   | 179.3  |            |       |         |       |
| (4-6-10-30)          | 0.1    | (14-6-10-18)  | 2.0    | (14-6-10-30)  | -177.2 |            |       |         |       |
| (4-6-14-26)          | -179.1 | (4-6-14-34)   | -1.0   | (10-6-14-26)  | -1.9   |            |       |         |       |
| (10-6-14-34)         | 176.2  | (4-8-12-20)   | 178.3  | (4-8-12-32)   | -1.5   |            |       |         |       |
| (16-8-12-20)         | 1.5    | (16-8-12-32)  | -178.3 | (4-8-16-28)   | -178.4 |            |       |         |       |
| (4-8-16-36)          | -0.1   | (12-8-16-28)  | -1.7   | (12-8-16-36)  | 176.5  |            |       |         |       |
| (6-10-18-22)         | -0.6   | (6-10-18-38)  | 179.5  | (30-10-18-22) | 178.6  |            |       |         |       |
| (30-10-18-38)        | -1.3   | (8-12-20-24)  | -0.3   | (8-12-20-40)  | 179.5  |            |       |         |       |
| (32-12-20-24)        | 179.5  | (32-12-20-40) | -0.7   | (6-14-26-22)  | 0.5    |            |       |         |       |
| (6-14-26-42)         | 179.6  | (34-14-26-22) | -177.6 | (34-14-26-42) | 1.4    |            |       |         |       |
| (8-16-28-24)         | 0.7    | (8-16-28-44)  | 179.5  | (36-16-28-24) | -177.6 |            |       |         |       |
| (36-16-28-44)        | 1.3    | (10-18-22-26) | -0.9   | (10-18-22-46) | 180.0  |            |       |         |       |
| (38-18-22-26)        | 179.0  | (38-18-22-46) | -0.1   | (12-20-24-28) | -0.7   |            |       |         |       |
| (12-20-24-48)        | 180.0  | (40-20-24-28) | 179.5  | (40-20-24-48) | 0.2    |            |       |         |       |
| (18-22-26-14)        | 0.9    | (18-22-26-42) | -178.1 | (46-22-26-14) | 180.0  |            |       |         |       |
| (46-22-26-42)        | 1.0    | (20-24-28-16) | 0.5    | (20-24-28-44) | -178.3 |            |       |         |       |
| (48-24-28-16)        | 179.8  | (48-24-28-44) | 1.0    |               |        |            |       |         |       |
| (bond)-(plane) angle |        | (2-4)-(6-4-8) |        | 4.0           |        |            |       |         |       |

|                                  |         |        |        |        |        |        |        |        |        |        |
|----------------------------------|---------|--------|--------|--------|--------|--------|--------|--------|--------|--------|
| Frequencies( $\text{cm}^{-1}$ ): | -2774.3 | 5.4    | 18.9   | 19.6   | 34.6   | 41.5   | 51.7   | 53.9   |        |        |
|                                  | 71.4    | 75.8   | 108.2  | 115.4  | 147.5  | 170.7  | 238.2  | 240.3  | 251.3  | 267.9  |
|                                  | 322.8   | 324.5  | 372.7  | 374.9  | 422.5  | 424.6  | 428.6  | 434.6  | 437.5  | 438.2  |
|                                  | 487.7   | 490.3  | 532.9  | 540.0  | 584.5  | 588.8  | 637.8  | 638.8  | 639.8  | 640.6  |
|                                  | 647.1   | 651.7  | 684.6  | 716.9  | 720.0  | 726.2  | 728.2  | 760.7  | 771.7  | 787.9  |
|                                  | 789.9   | 801.4  | 804.3  | 865.7  | 872.3  | 884.1  | 885.9  | 942.1  | 946.3  | 961.4  |
|                                  | 963.3   | 971.2  | 971.3  | 1019.2 | 1021.3 | 1028.0 | 1029.2 | 1031.6 | 1032.8 | 1035.1 |
|                                  | 1036.2  | 1038.5 | 1038.6 | 1040.0 | 1040.1 | 1083.3 | 1083.4 | 1085.3 | 1085.8 | 1137.7 |
|                                  | 1137.9  | 1143.4 | 1144.3 | 1201.4 | 1202.8 | 1207.3 | 1207.4 | 1208.5 | 1208.6 | 1222.6 |
|                                  | 1225.1  | 1238.4 | 1239.1 | 1244.4 | 1357.3 | 1358.6 | 1361.4 | 1363.6 | 1398.7 | 1398.8 |
|                                  | 1403.6  | 1404.3 | 1407.8 | 1408.4 | 1429.0 | 1440.6 | 1531.6 | 1531.7 | 1547.3 | 1548.7 |
|                                  | 1569.8  | 1570.1 | 1573.0 | 1573.3 | 1688.9 | 1689.0 | 1694.5 | 1701.6 | 1702.1 | 1704.0 |
|                                  | 1705.0  | 1714.5 | 1715.9 | 3274.4 | 3274.6 | 3274.8 | 3275.0 | 3282.9 | 3283.1 | 3283.6 |
|                                  | 3283.7  | 3297.4 | 3297.5 | 3299.5 | 3299.7 | 3304.8 | 3304.9 | 3312.4 | 3312.5 | 3318.6 |
|                                  | 3318.6  | 3334.1 | 3335.4 |        |        |        |        |        |        |        |
